# Supplementary material for: Synthesis and energetic properties of homocubane based high energy density materials
Source: Royal Society of Chemistry journal article supplement (doi:10.1039/d0qo01084g), 2020-10-23
Supplement: d0qo01084g1.pdf [file d0qo01084g1.pdf]

Computational Data  
For  
**Synthesis and Energetic Properties of Homocubane Based High Energy Density Materials**

Sohan Lal,<sup>a</sup> Arindrajit Chowdhury,<sup>b\*</sup> Neeraj Kumbhakarna,<sup>b\*</sup> Sundaramoorthy Nandagopal,<sup>c</sup> Arvind Kumar,<sup>c</sup> Irishi N. N.  
Namboothiri<sup>a\*</sup>

*Department of Chemistry,<sup>a</sup> Department of Mechanical Engineering,<sup>b</sup> Indian Institute of Technology Bombay, Mumbai, 400 076, India*  
irishi@iitb.ac.in, arindra@iitb.ac.in, neeraj\_k@iitb.ac.in

*High Energy Materials Research Laboratory, Defence Research and Development Organisation, Pune 411 021, Maharashtra, India<sup>c</sup>*

| <b>Entry</b> | <b>Table of Contents</b>                                                                       | <b>Page</b> |
|--------------|------------------------------------------------------------------------------------------------|-------------|
| 1            | <b>Table S1.</b> Overall yields for compounds <b>8-30</b>                                      | 5           |
| 2            | <b>Table S2.</b> Comparison of predicted explosive properties                                  | 6           |
| 3            | <b>Table S3.</b> Plausible decomposition pathways and corresponding bond dissociation energies | 7           |
| 4            | <b>Table S4.</b> Atomic coordinates for optimized structure of compound <b>8</b>               | 22          |
| 5            | <b>Table S5.</b> Atomic coordinates for optimized structure of compound <b>13</b>              | 23          |
| 6            | <b>Table S6.</b> Atomic coordinates for optimized structure of compound <b>14</b>              | 25          |
| 7            | <b>Table S7.</b> Atomic coordinates for optimized structure of compound <b>15</b>              | 26          |
| 8            | <b>Table S8.</b> Atomic coordinates for optimized structure of compound <b>16</b>              | 28          |
| 9            | <b>Table S9.</b> Atomic coordinates for optimized structure of compound <b>18</b>              | 30          |
| 10           | <b>Table S10.</b> Atomic coordinates for optimized structure of compound <b>18a</b>            | 32          |
| 11           | <b>Table S11.</b> Atomic coordinates for optimized structure of compound <b>19</b>             | 33          |

|           |                                                                                      |           |
|-----------|--------------------------------------------------------------------------------------|-----------|
| <b>12</b> | <b>Table S12.</b> Atomic coordinates for optimized structure of compound <b>21a</b>  | <b>35</b> |
| <b>13</b> | <b>Table S13.</b> Atomic coordinates for optimized structure of compound <b>21b</b>  | <b>37</b> |
| <b>14</b> | <b>Table S14.</b> Atomic coordinates for optimized structure of compound <b>24</b>   | <b>39</b> |
| <b>15</b> | <b>Table S15.</b> Atomic coordinates for optimized structure of compound <b>25</b>   | <b>41</b> |
| <b>16</b> | <b>Table S16.</b> Atomic coordinates for optimized structure of compound <b>27</b>   | <b>43</b> |
| <b>17</b> | <b>Table S17.</b> Atomic coordinates for optimized structure of compound <b>28</b>   | <b>45</b> |
| <b>18</b> | <b>Table S18.</b> Atomic coordinates for optimized structure of compound <b>30a</b>  | <b>48</b> |
| <b>19</b> | <b>Table S19.</b> Atomic coordinates for optimized structure of compound <b>30b</b>  | <b>50</b> |
| <b>20</b> | <b>Table S20.</b> Atomic coordinates for optimized structure of compound <b>30c</b>  | <b>52</b> |
| <b>21</b> | <b>Table S21.</b> Atomic coordinates for optimized structure of compound <b>31</b>   | <b>55</b> |
| <b>22</b> | <b>Table S22.</b> Atomic coordinates for optimized structure of compound <b>32</b>   | <b>57</b> |
| <b>23</b> | <b>Table S23.</b> Atomic coordinates for optimized structure of compound <b>33</b>   | <b>59</b> |
| <b>24</b> | <b>Table S24.</b> Atomic coordinates for optimized structure of biradical <b>8A</b>  | <b>61</b> |
| <b>25</b> | <b>Table S25.</b> Atomic coordinates for optimized structure of biradical <b>8B</b>  | <b>62</b> |
| <b>26</b> | <b>Table S26.</b> Atomic coordinates for optimized structure of biradical <b>13A</b> | <b>64</b> |
| <b>27</b> | <b>Table S27.</b> Atomic coordinates for optimized structure of biradical <b>13B</b> | <b>65</b> |
| <b>28</b> | <b>Table S28.</b> Atomic coordinates for optimized structure of biradical <b>14A</b> | <b>67</b> |
| <b>29</b> | <b>Table S29.</b> Atomic coordinates for optimized structure of biradical <b>14B</b> | <b>68</b> |
| <b>30</b> | <b>Table S30.</b> Atomic coordinates for optimized structure of biradical <b>15A</b> | <b>70</b> |

|           |                                                                                       |            |
|-----------|---------------------------------------------------------------------------------------|------------|
| <b>31</b> | <b>Table S31.</b> Atomic coordinates for optimized structure of biradical <b>15B</b>  | <b>71</b>  |
| <b>32</b> | <b>Table S32.</b> Atomic coordinates for optimized structure of biradical <b>15C</b>  | <b>73</b>  |
| <b>33</b> | <b>Table S33.</b> Atomic coordinates for optimized structure of biradical <b>15D</b>  | <b>74</b>  |
| <b>34</b> | <b>Table S34.</b> Atomic coordinates for optimized structure of biradical <b>16A</b>  | <b>76</b>  |
| <b>35</b> | <b>Table S35.</b> Atomic coordinates for optimized structure of biradical <b>16B</b>  | <b>78</b>  |
| <b>36</b> | <b>Table S36.</b> Atomic coordinates for optimized structure of biradical <b>18A</b>  | <b>80</b>  |
| <b>37</b> | <b>Table S37.</b> Atomic coordinates for optimized structure of biradical <b>18B</b>  | <b>81</b>  |
| <b>38</b> | <b>Table S38.</b> Atomic coordinates for optimized structure of biradical <b>18aA</b> | <b>83</b>  |
| <b>39</b> | <b>Table S39.</b> Atomic coordinates for optimized structure of biradical <b>18aB</b> | <b>84</b>  |
| <b>40</b> | <b>Table S40.</b> Atomic coordinates for optimized structure of biradical <b>19A</b>  | <b>86</b>  |
| <b>41</b> | <b>Table S41.</b> Atomic coordinates for optimized structure of biradical <b>19B</b>  | <b>88</b>  |
| <b>42</b> | <b>Table S42.</b> Atomic coordinates for optimized structure of biradical <b>21aA</b> | <b>89</b>  |
| <b>43</b> | <b>Table S43.</b> Atomic coordinates for optimized structure of biradical <b>21aB</b> | <b>91</b>  |
| <b>44</b> | <b>Table S44.</b> Atomic coordinates for optimized structure of biradical <b>21bA</b> | <b>93</b>  |
| <b>45</b> | <b>Table S45.</b> Atomic coordinates for optimized structure of biradical <b>21bB</b> | <b>95</b>  |
| <b>46</b> | <b>Table S46.</b> Atomic coordinates for optimized structure of biradical <b>24A</b>  | <b>98</b>  |
| <b>47</b> | <b>Table S47.</b> Atomic coordinates for optimized structure of biradical <b>24B</b>  | <b>100</b> |
| <b>48</b> | <b>Table S48.</b> Atomic coordinates for optimized structure of biradical <b>25A</b>  | <b>102</b> |
| <b>49</b> | <b>Table S49.</b> Atomic coordinates for optimized structure of biradical <b>25B</b>  | <b>103</b> |

|           |                                                                                       |            |
|-----------|---------------------------------------------------------------------------------------|------------|
| <b>50</b> | <b>Table S50.</b> Atomic coordinates for optimized structure of biradical <b>27A</b>  | <b>105</b> |
| <b>51</b> | <b>Table S51.</b> Atomic coordinates for optimized structure of biradical <b>27B</b>  | <b>107</b> |
| <b>52</b> | <b>Table S52.</b> Atomic coordinates for optimized structure of biradical <b>28A</b>  | <b>109</b> |
| <b>53</b> | <b>Table S53.</b> Atomic coordinates for optimized structure of biradical <b>28B</b>  | <b>111</b> |
| <b>54</b> | <b>Table S54.</b> Atomic coordinates for optimized structure of biradical <b>28C</b>  | <b>114</b> |
| <b>55</b> | <b>Table S55.</b> Atomic coordinates for optimized structure of biradical <b>28D</b>  | <b>116</b> |
| <b>56</b> | <b>Table S56.</b> Atomic coordinates for optimized structure of biradical <b>30aA</b> | <b>118</b> |
| <b>57</b> | <b>Table S57.</b> Atomic coordinates for optimized structure of biradical <b>30aB</b> | <b>121</b> |
| <b>58</b> | <b>Table S58.</b> Atomic coordinates for optimized structure of biradical <b>30bA</b> | <b>123</b> |
| <b>59</b> | <b>Table S59.</b> Atomic coordinates for optimized structure of biradical <b>30bB</b> | <b>126</b> |
| <b>60</b> | <b>Table S60.</b> Atomic coordinates for optimized structure of biradical <b>30cA</b> | <b>128</b> |
| <b>61</b> | <b>Table S61.</b> Atomic coordinates for optimized structure of biradical <b>30cB</b> | <b>130</b> |
| <b>62</b> | <b>Table S62.</b> Atomic coordinates for optimized structure of biradical <b>31A</b>  | <b>133</b> |
| <b>63</b> | <b>Table S63.</b> Atomic coordinates for optimized structure of biradical <b>32A</b>  | <b>134</b> |
| <b>64</b> | <b>Table S64.</b> Atomic coordinates for optimized structure of biradical <b>32B</b>  | <b>136</b> |
| <b>65</b> | <b>Table S65.</b> Atomic coordinates for optimized structure of biradical <b>33C</b>  | <b>138</b> |
| <b>66</b> | <b>Table S66.</b> Atomic coordinates for optimized structure of biradical <b>32D</b>  | <b>140</b> |
| <b>67</b> | <b>Table S67.</b> Atomic coordinates for optimized structure of biradical <b>33A</b>  | <b>142</b> |
| <b>68</b> | <b>Table S68.</b> Atomic coordinates for optimized structure of biradical <b>33B</b>  | <b>143</b> |

---

**Table S1. Overall yields for compounds 8-30 Calculated starting from (A) 1,4-dioxaspiro[4.4]nonane. (B) Cyclopentanone**

| Compound          |          | <b>8</b>    | <b>9</b>    | <b>10</b>   | <b>11</b>   | <b>12</b>   | <b>13</b>   | <b>14</b>   | <b>15</b>   | <b>16</b>    | <b>17</b>   | <b>18</b>   |
|-------------------|----------|-------------|-------------|-------------|-------------|-------------|-------------|-------------|-------------|--------------|-------------|-------------|
| Overall yield (%) | <b>A</b> | 38.7<br>(5) | 36.0<br>(6) | 32.8<br>(7) | 28.1<br>(7) | 19.9<br>(8) | 27.1<br>(6) | 25.7<br>(7) | 19.6<br>(8) | 14.9<br>(9)  | 21.4<br>(7) | 14.8<br>(8) |
|                   | <b>B</b> | 27.1<br>(6) | 25.2<br>(7) | 23.0<br>(8) | 19.7<br>(8) | 13.9<br>(9) | 19.0<br>(7) | 18.0<br>(8) | 13.7<br>(9) | 10.4<br>(10) | 15.0<br>(8) | 10.4<br>(9) |
|                   |          |             |             |             |             |             |             |             |             |              |             |             |
| Compound          |          | <b>19</b>   | <b>21a</b>  | <b>21b</b>  | <b>24</b>   | <b>25</b>   | <b>27</b>   | <b>28</b>   | <b>30a</b>  | <b>30b</b>   | <b>30c</b>  |             |
| Overall yield (%) | <b>A</b> | 36.8<br>(6) | 21.3<br>(7) | 20.6<br>(7) | 15.5<br>(7) | 25.7<br>(7) | 25.0<br>(7) | 18.0<br>(8) | 15.7<br>(7) | 14.6<br>(7)  | 14.9<br>(7) |             |
|                   | <b>B</b> | 25.8<br>(7) | 14.9<br>(8) | 14.4<br>(8) | 10.9<br>(8) | 18.0<br>(8) | 17.5<br>(8) | 12.6<br>(9) | 11.0<br>(8) | 10.3<br>(8)  | 10.4<br>(8) |             |

Detonation properties of these homocubanes are reported in Table S1 and compared with that of the well-known explosive RDX. The calculations based on CO<sub>2</sub> as well as CO suggested that, all of these compounds have a negative oxygen balance indicating that they are oxygen deficient compounds. Due to low oxygen contents, these compounds are not good candidates as monopropellants. Compounds **8**, **13**, **18**, **18a** and **19** do not contain nitrogen, whereas compounds **14** and **33** bear, respectively, only 5% and 4.7% nitrogen in the skeleton. Compounds **15**, **27** and **31** possess a higher percentage of nitrogen (17.34%, 14.70% and 13.55%, respectively) in their molecule than other homocubanes studied in the present work. Overall percentage of nitrogen and oxygen was also calculated which showed that compounds **15**, **25**, **27**, **28** and **33** are superior in the series, having, respectively, 27.24%, 24.28%, 31.49%, 20.33% and 20.80% of nitrogen and oxygen. This is clearly reflected in their performance as better explosives. Comparison of detonation properties with well-known explosive RDX suggests that compounds **15**, **25**, **28** and **31** are best candidates in the series, however, these compounds are not explosive in nature.

**Table S2. Comparison of predicted explosive properties<sup>a-g</sup>**

| <b>Propellant</b> | <b>OB<sup>CO2</sup> (%)</b> | <b>OB<sup>CO</sup> (%)</b> | <b>N (%)<sup>b</sup></b> | <b>O (%)<sup>c</sup></b> | <b>N+O (%)<sup>d</sup></b> | <b>HOF (kJ mol<sup>-1</sup>)</b> | <b>DP<sup>e</sup>(GPa)</b> | <b>DV<sup>f</sup>(km s<sup>-1</sup>)</b> |
|-------------------|-----------------------------|----------------------------|--------------------------|--------------------------|----------------------------|----------------------------------|----------------------------|------------------------------------------|
| <b>RDX</b>        | -21.62                      | 0.0                        | 37.84                    | 43.22                    | 81.06                      | 67.00                            | 35.10                      | 8.93                                     |
| <b>CB</b>         | -307.69                     | -184.62                    | -                        | -                        | -                          | 601.92 (621.57) <sup>h</sup>     | 12.70 <sup>i</sup>         | 5.99 <sup>i</sup>                        |
| <b>CL20</b>       | -10.95                      | 10.95                      | 38.36                    | 43.82                    | 82.18                      | 539.33 (550±20) <sup>j</sup>     | 46.33 (45.60) <sup>k</sup> | 9.86 (9.79) <sup>k</sup>                 |
| <b>8</b>          | -133.82                     | -69.58                     | -                        | 21.40                    | 21.40                      | -107.71                          | 11.90                      | 5.23                                     |
| <b>13</b>         | -151.63                     | -84.24                     | -                        | 16.83                    | 16.83                      | 84.14                            | 14.94                      | 5.78                                     |
| <b>14</b>         | -151.48                     | -82.88                     | 5.00                     | 11.42                    | 16.42                      | 387.66                           | 13.73                      | 5.48                                     |
| <b>15</b>         | -133.79                     | -74.32                     | 17.34                    | 9.90                     | 27.24                      | 581.25                           | 16.08                      | 5.97                                     |
| <b>16</b>         | -168.46                     | -92.25                     | 7.02                     | 12.02                    | 19.04                      | 441.14                           | 10.40                      | 4.95                                     |
| <b>18</b>         | -244.21                     | -143.16                    | -                        | 16.82                    | 16.82                      | 201.51                           | 10.19                      | 5.09                                     |
| <b>18a</b>        | -166.60                     | -95.20                     | -                        | 11.89                    | 11.89                      | 225.45                           | 13.23                      | 5.39                                     |
| <b>19</b>         | -143.18                     | -76.70                     | -                        | 20.44                    | 20.44                      | -86.60                           | 12.66                      | 5.45                                     |
| <b>21a</b>        | -174.38                     | -96.87                     | 6.78                     | 11.61                    | 18.39                      | 442.54                           | 11.66                      | 5.16                                     |
| <b>21b</b>        | 181.78                      | -99.80                     | 6.23                     | 10.68                    | 16.91                      | 556.43                           | 10.35                      | 4.89                                     |
| <b>24</b>         | -137.30                     | -73.67                     | 5.86                     | 10.04                    | 15.90                      | 476.10                           | 14.25                      | 5.44                                     |
| <b>25</b>         | -140.17                     | -79.00                     | 8.95                     | 15.33                    | 24.28                      | 1704.91                          | 25.49                      | 7.48                                     |
| <b>27</b>         | -126.02                     | -67.21                     | 14.70                    | 16.79                    | 31.49                      | 301.55                           | 10.07                      | 5.12                                     |
| <b>28</b>         | -146.49                     | -81.38                     | 9.49                     | 10.84                    | 20.33                      | 873.47                           | 26.24                      | 7.05                                     |
| <b>30a</b>        | -195.93                     | 110.31                     | 8.64                     | 6.58                     | 15.22                      | 694.26                           | 7.79                       | 4.38                                     |
| <b>30b</b>        | -165.82                     | -90.84                     | 7.57                     | 5.76                     | 13.33                      | 680.47                           | 6.10                       | 3.94                                     |
| <b>30c</b>        | -142.92                     | -78.29                     | 6.52                     | 4.97                     | 11.49                      | 760.33                           | 9.25                       | 4.54                                     |
| <b>31</b>         | -141.98                     | -80.02                     | 13.55                    | 10.32                    | 23.87                      | 561.73                           | 15.94                      | 5.96                                     |
| <b>32</b>         | -180.62                     | -102.93                    | 10.19                    | 7.76                     | 17.95                      | 648.48                           | 7.61                       | 4.48                                     |
| <b>33</b>         | -142.33                     | -77.87                     | 4.70                     | 16.10                    | 20.80                      | 70.91                            | 10.19                      | 4.98                                     |

<sup>a</sup>Calculated using Kamlet-Jacobs correlations; literature (experimental or calculated) values in parenthesis. <sup>b</sup>Nitrogen content. <sup>c</sup>Oxygen content. <sup>d</sup>Nitrogen and oxygen contents. <sup>e</sup>D.P. -detonation pressure. <sup>f</sup>D.V. -detonation velocity. <sup>g</sup>Method: (B3LYP/6-311++g(d,p)). <sup>h</sup>Experimental, ref 8, main text). <sup>i</sup>Calculated, ref 26d, main text. <sup>j</sup>Calculated, ref 64, main text. <sup>k</sup>Experimental, B. M. Dobratz and P. C. Crawford, LLNL Explosives Handbook of Properties of Chemical Explosives and Explosive Simulants, UCRL-52997, 1985.

**Table S3. Plausible decomposition pathways and corresponding bond dissociation energies<sup>a</sup>**

| #   | Decomposition pathways                                                                             | LB <sup>b</sup> | LBL (Å) <sup>c</sup> | SLB <sup>d</sup> | SLBL (Å) <sup>e</sup> | BO <sup>f</sup> | HOF <sup>g</sup> | BDE <sup>h</sup> |
|-----|----------------------------------------------------------------------------------------------------|-----------------|----------------------|------------------|-----------------------|-----------------|------------------|------------------|
|     |                                                                                                    |                 |                      |                  |                       |                 | kcal/mol         | (kcal/mol)       |
| 8A  | 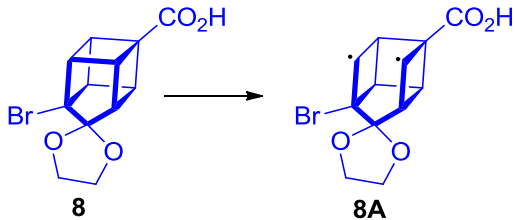 <p>8 → 8A</p>    | 8,13            | 1.5794               | ---              | ---                   | 0.9733          | 24.31            | 50.04            |
| 8B  |  <p>8 → 8B</p>    | ---             | ---                  | 1,4              | 1.5786                | 0.9555          | 24.34            | 50.08            |
| 13A |  <p>13 → 13A</p> | 1,7             | 1.5805               | ---              | ---                   | 0.9633          | 69.35            | 49.24            |

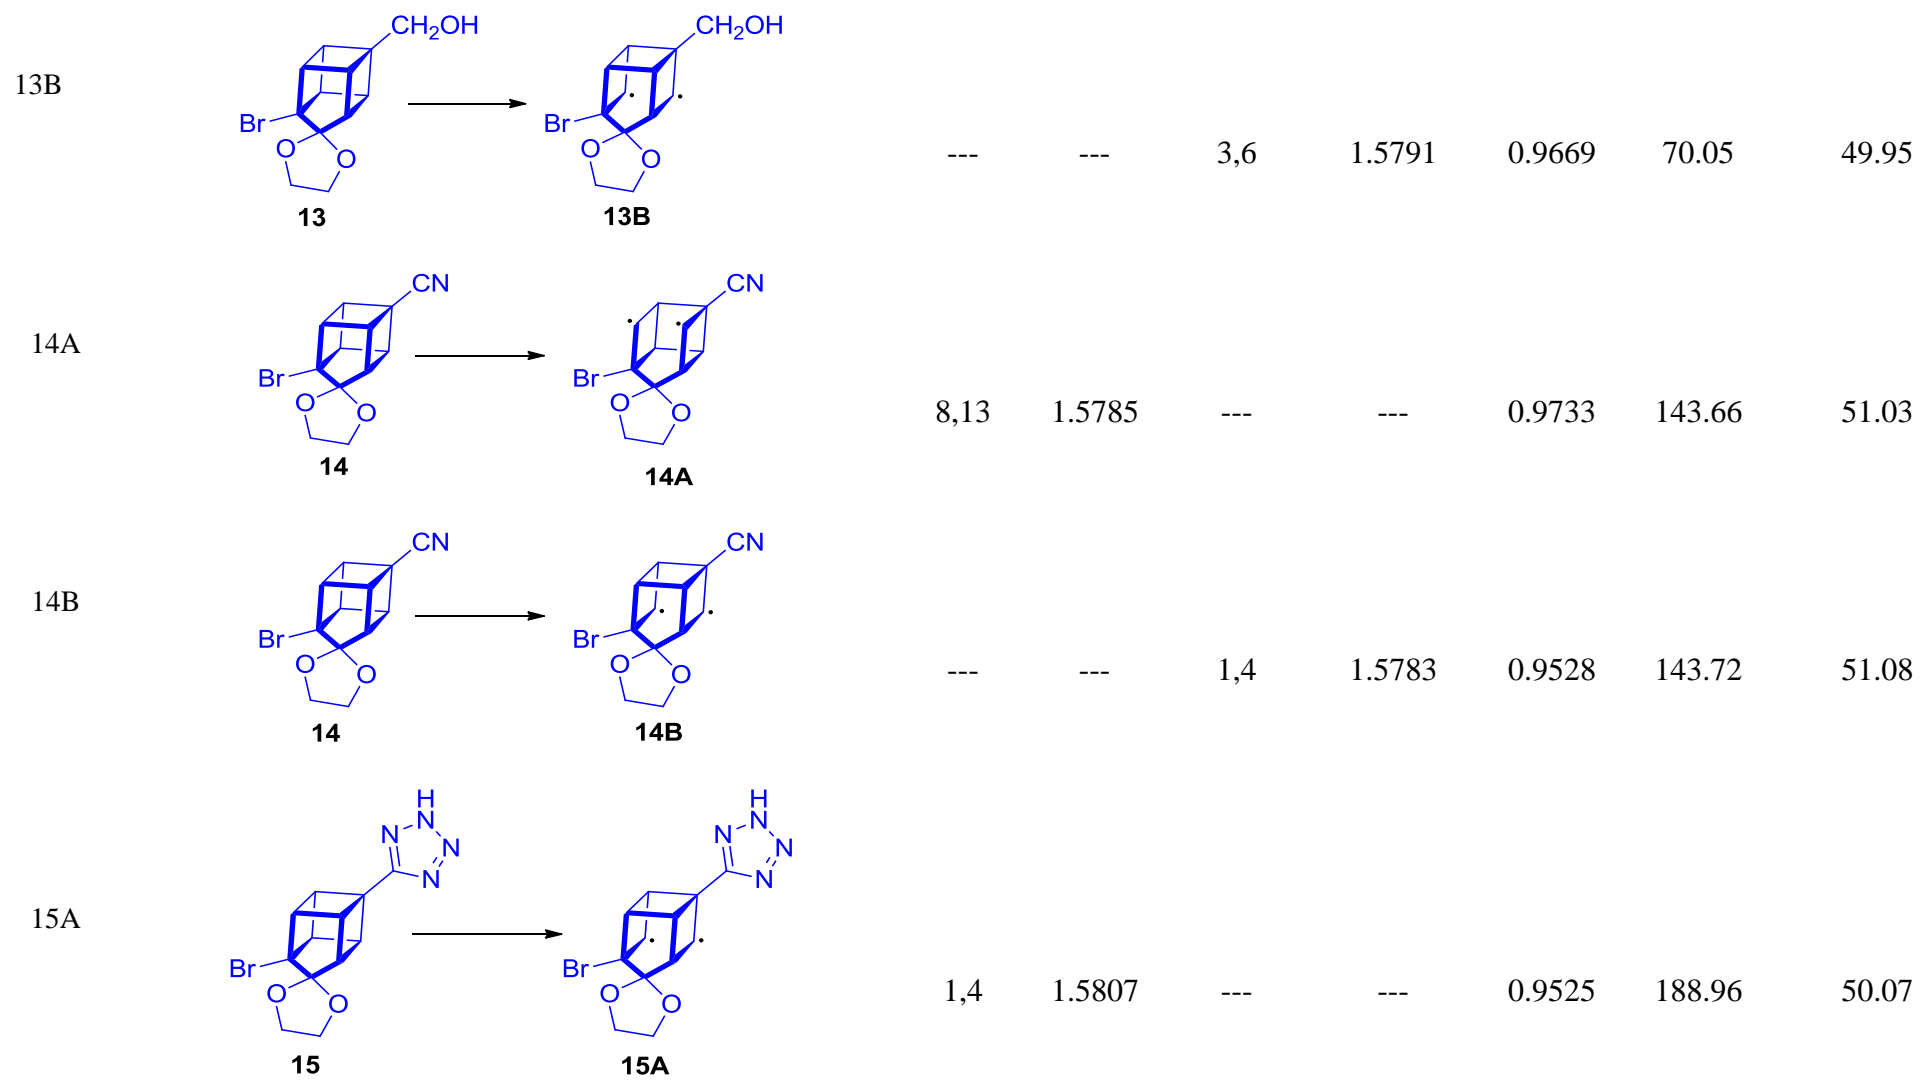



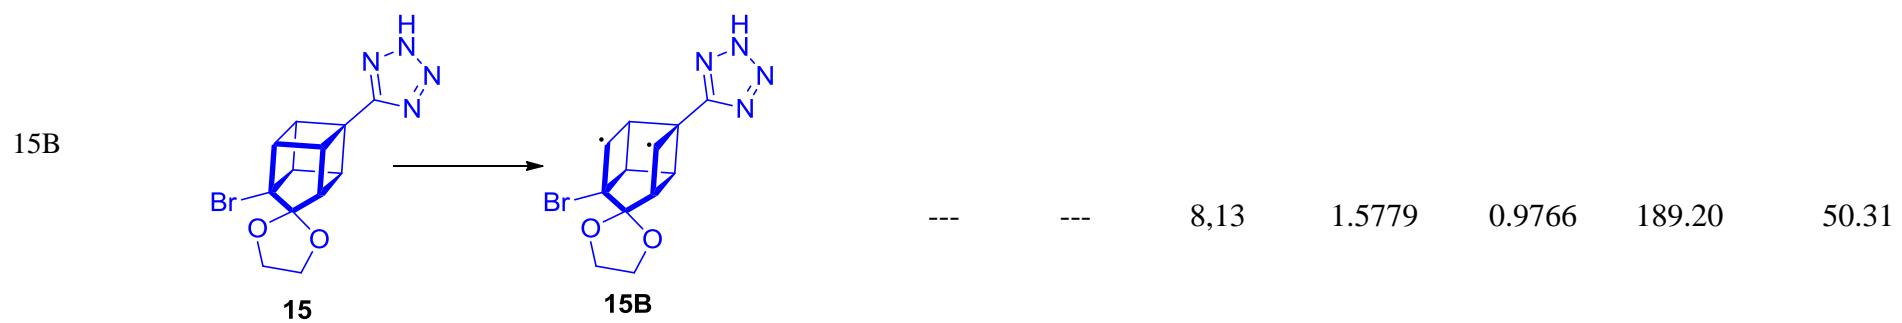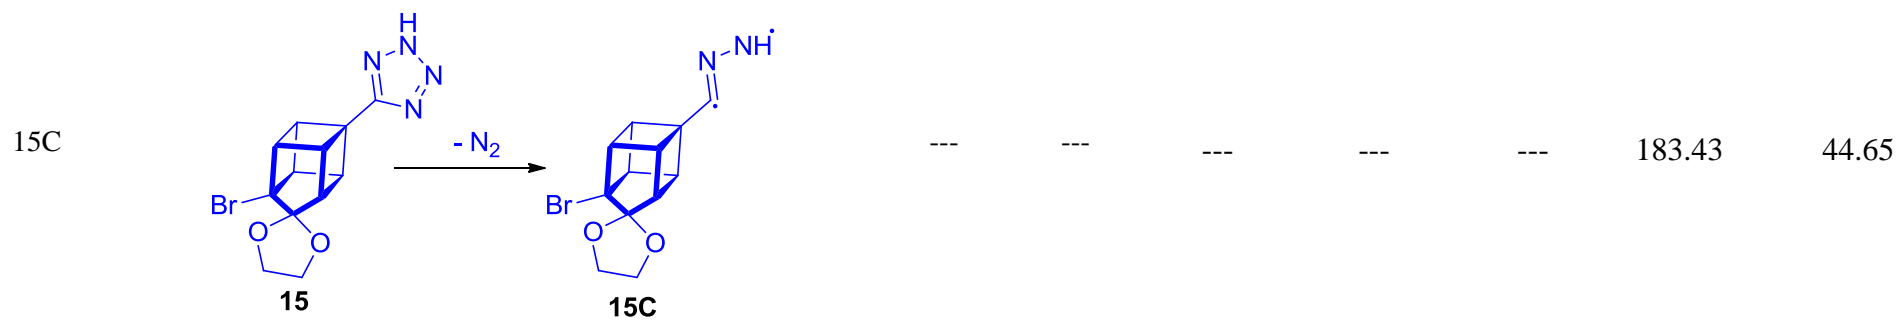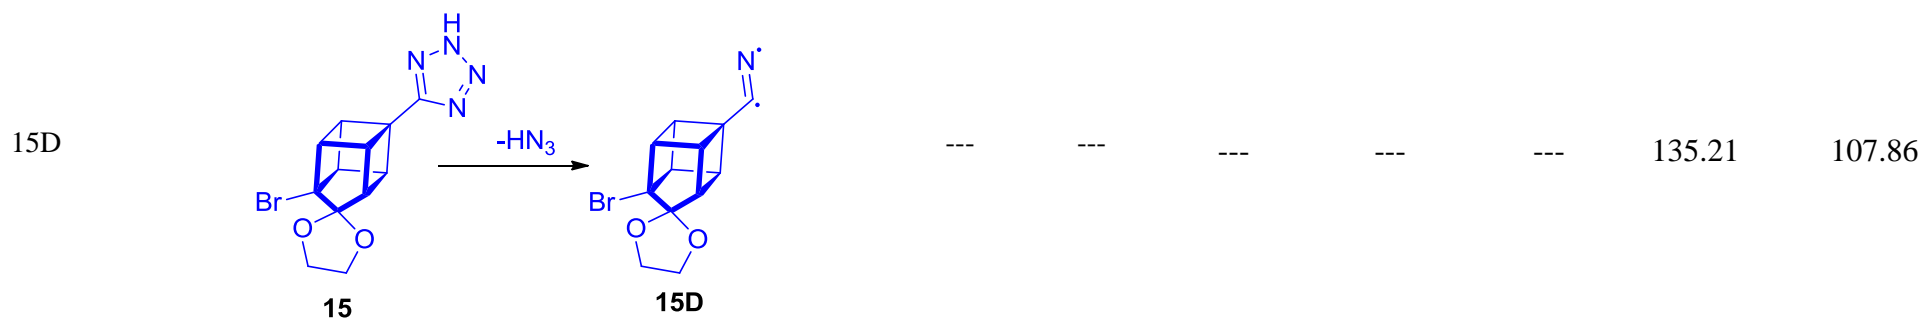

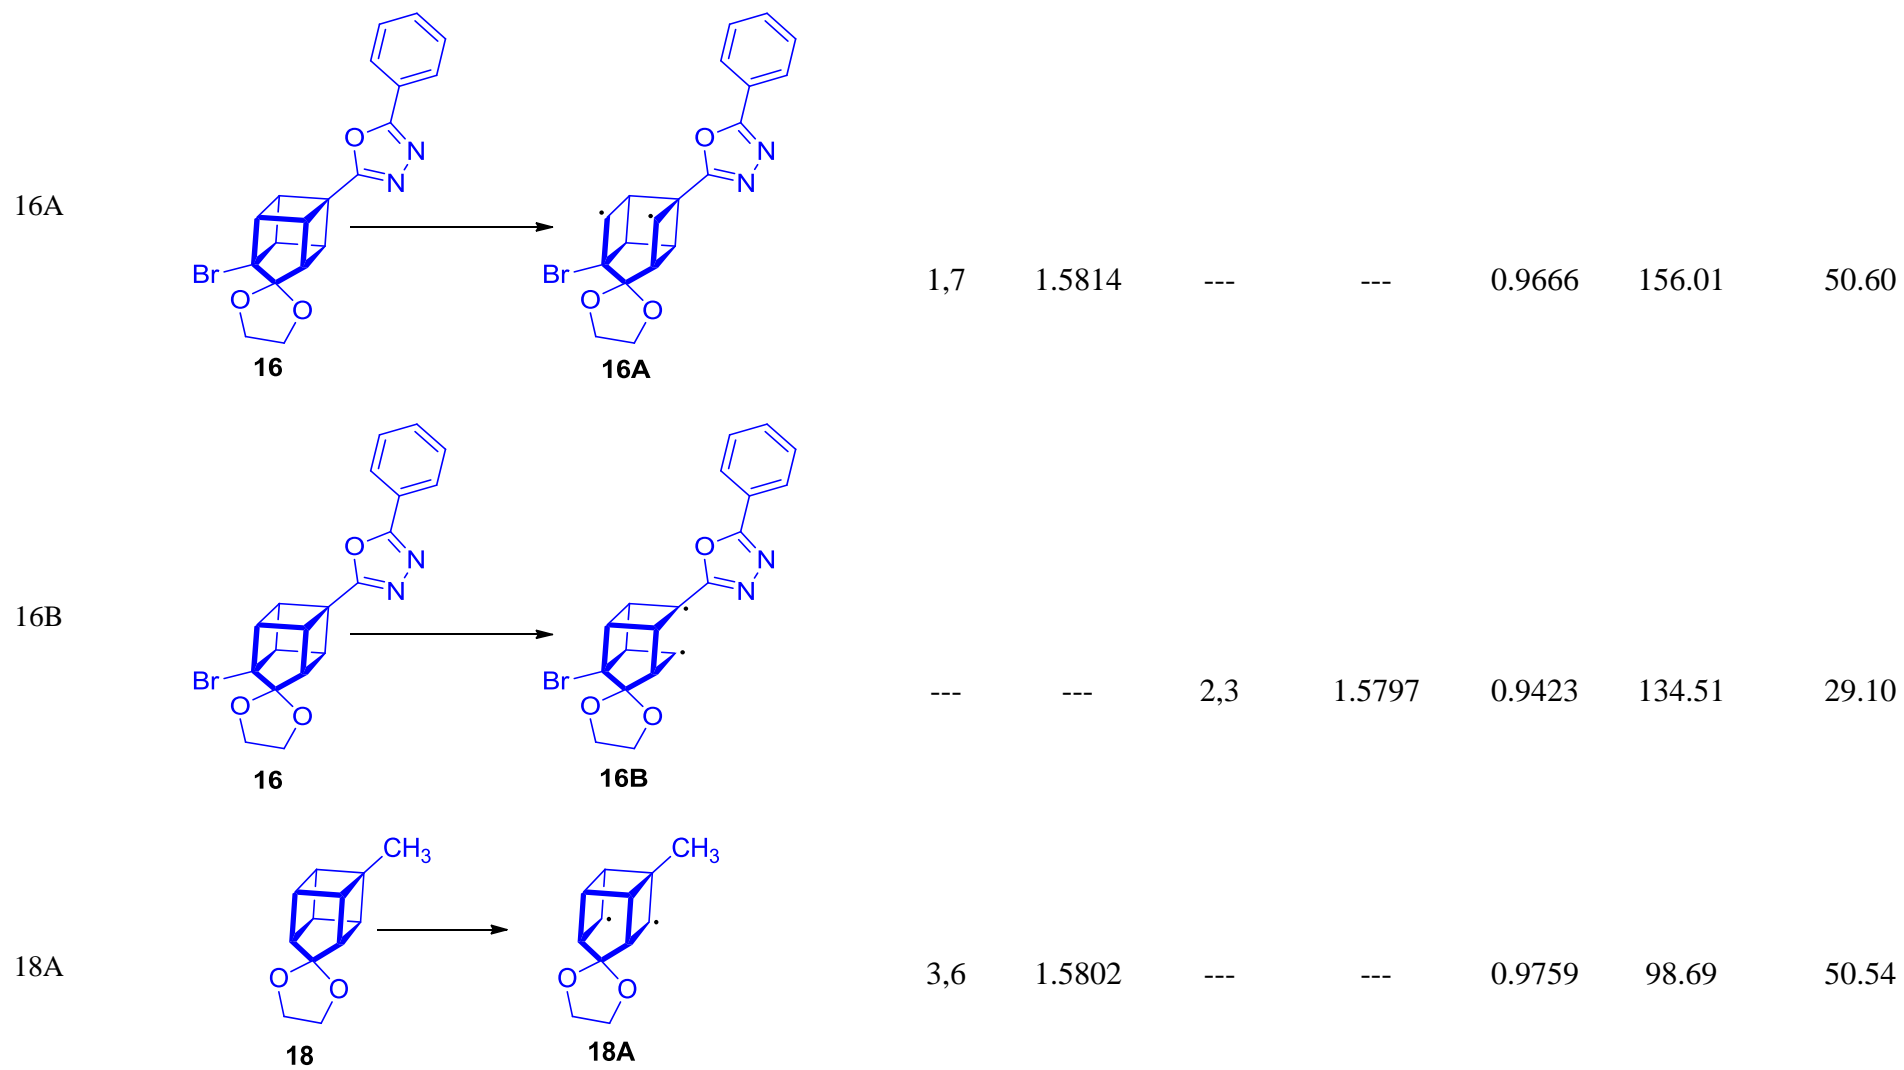

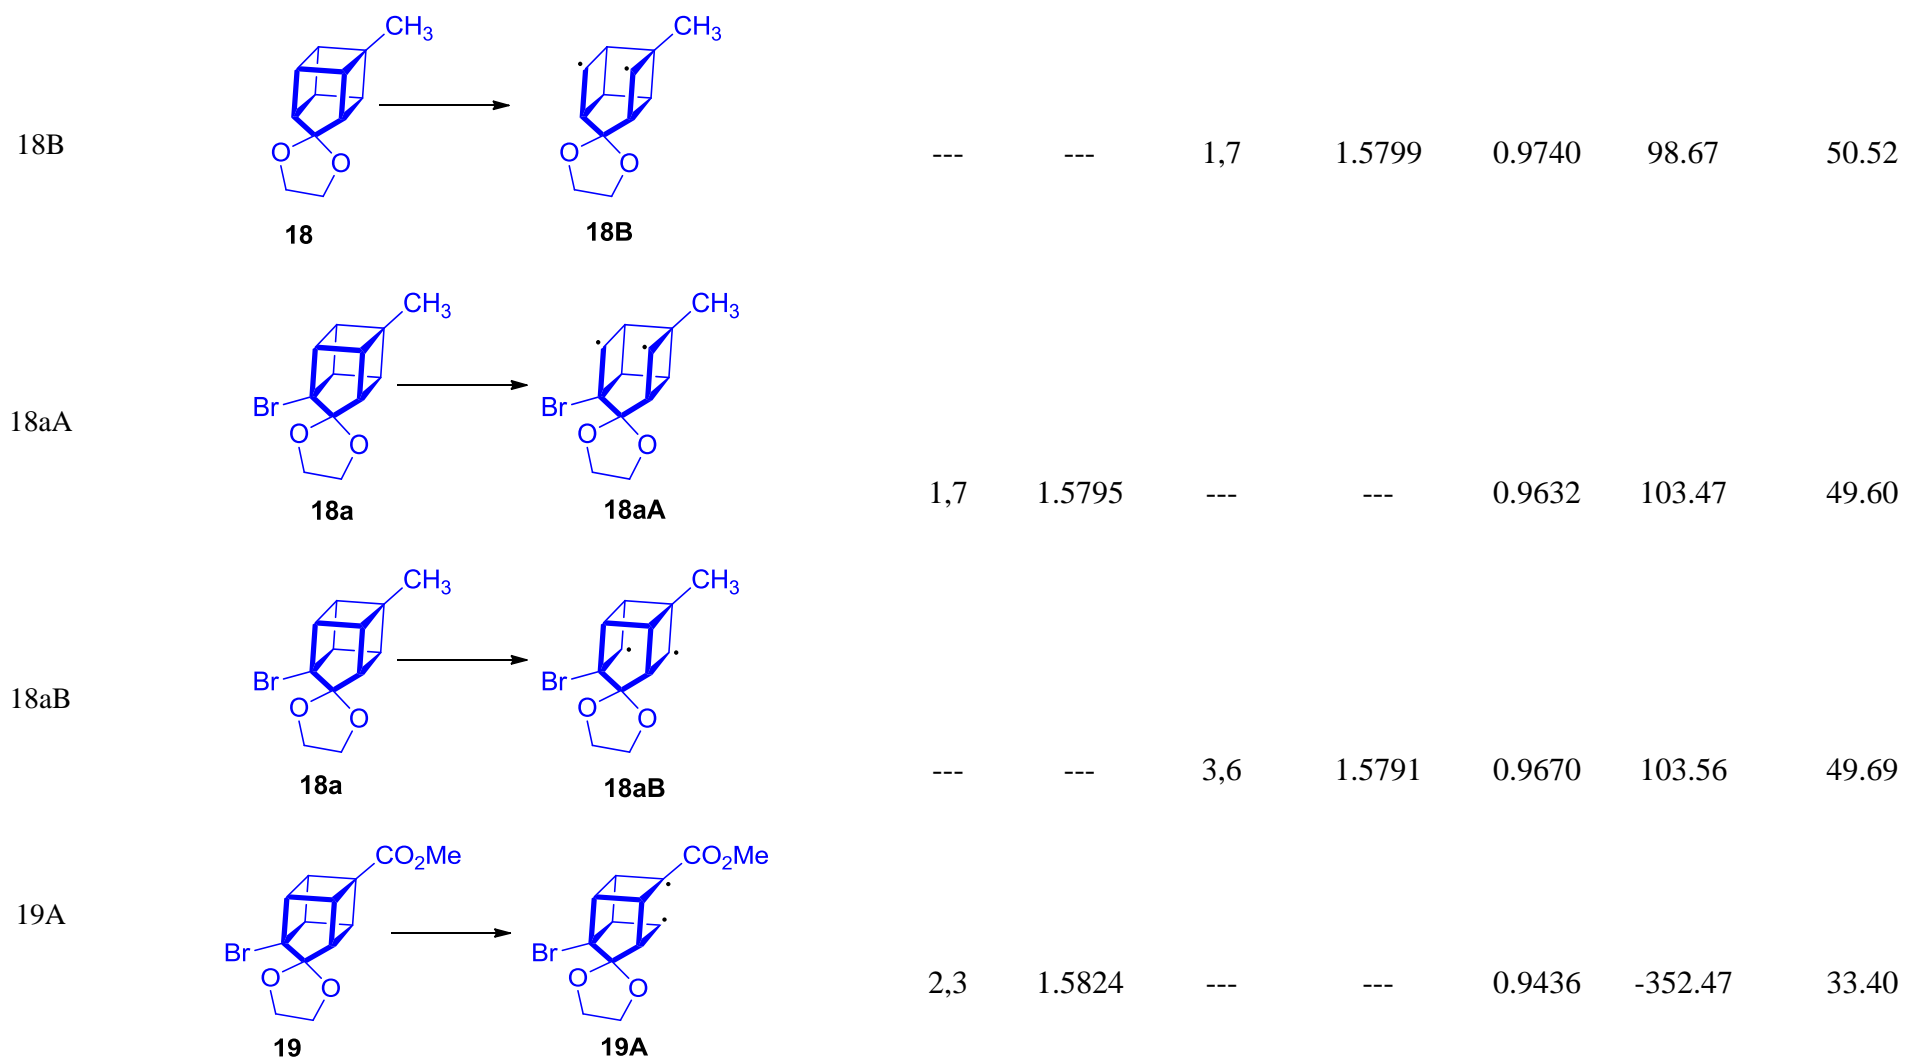

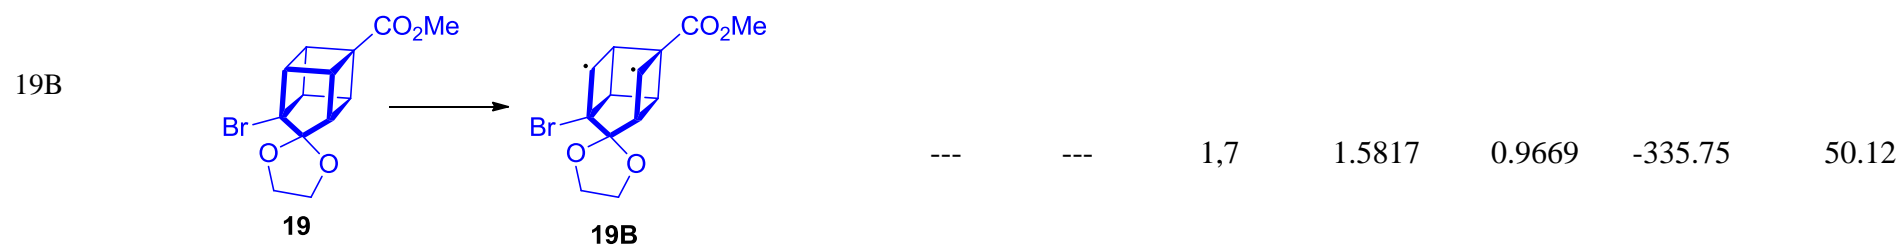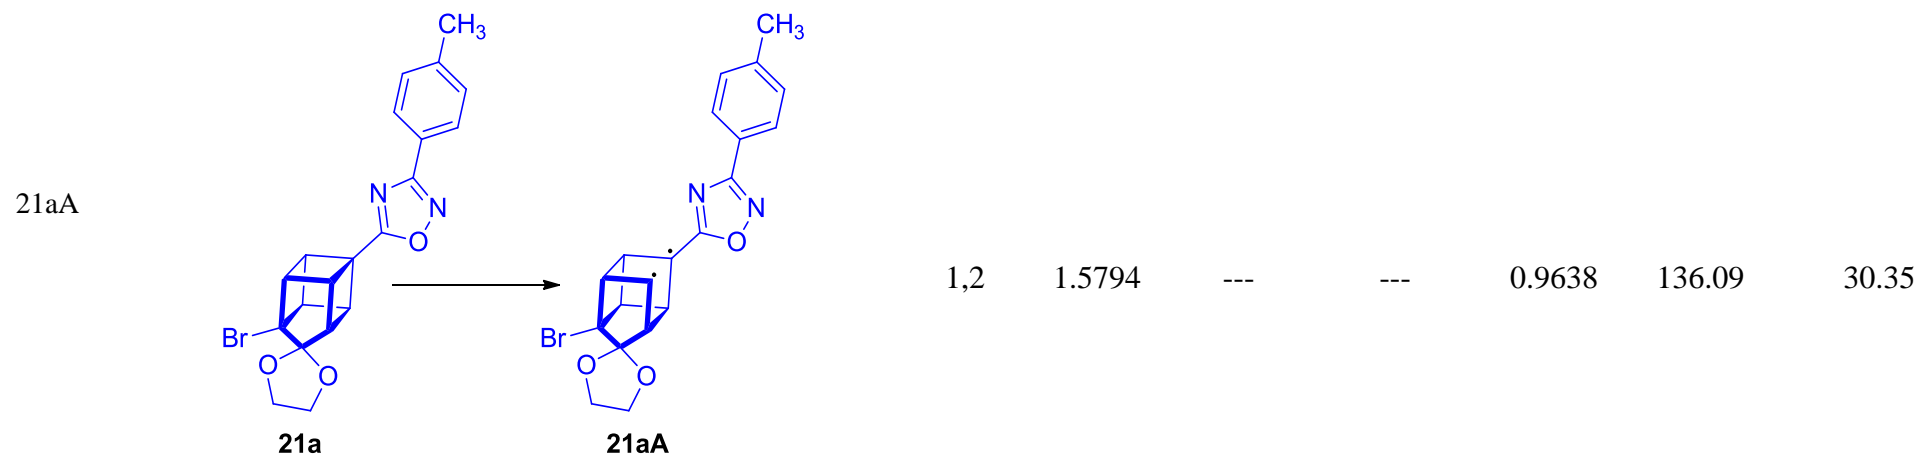

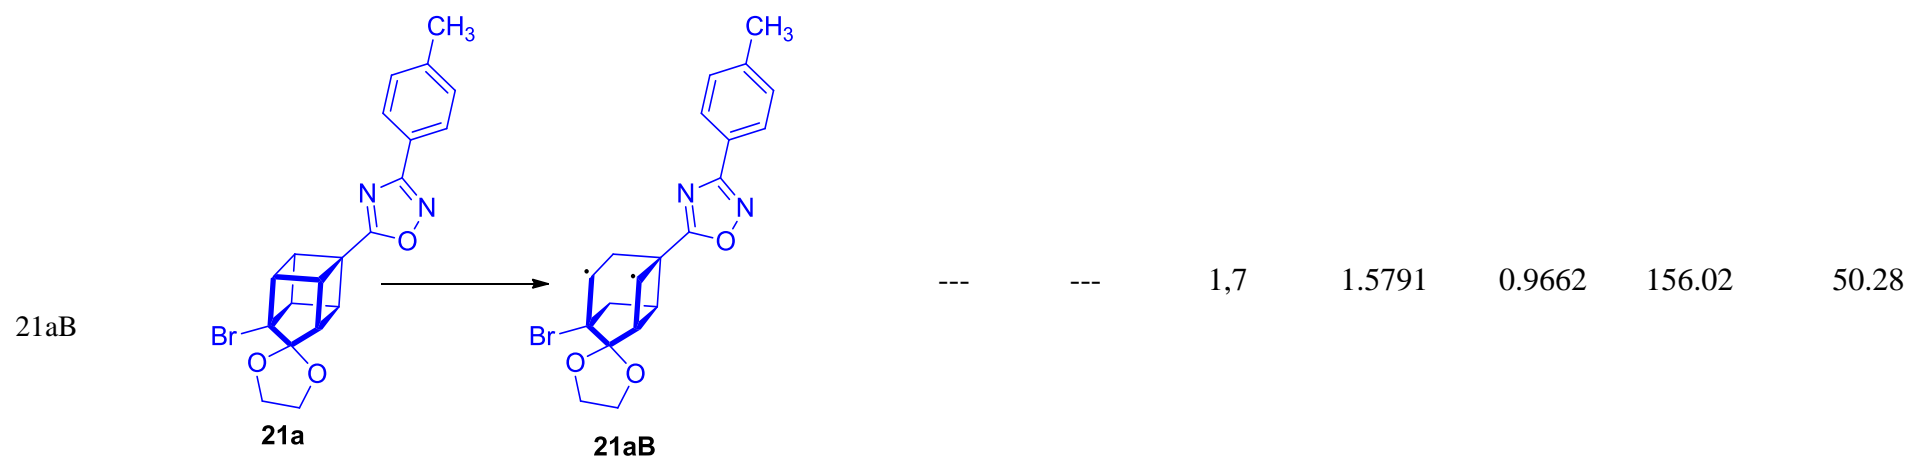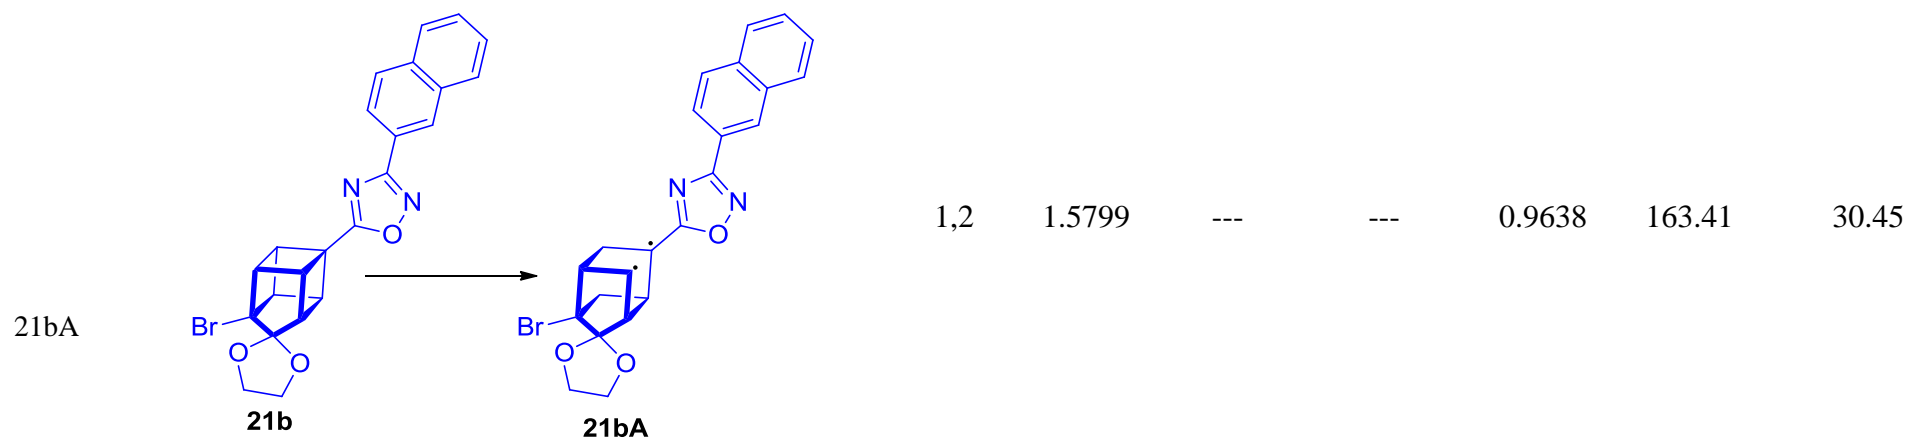

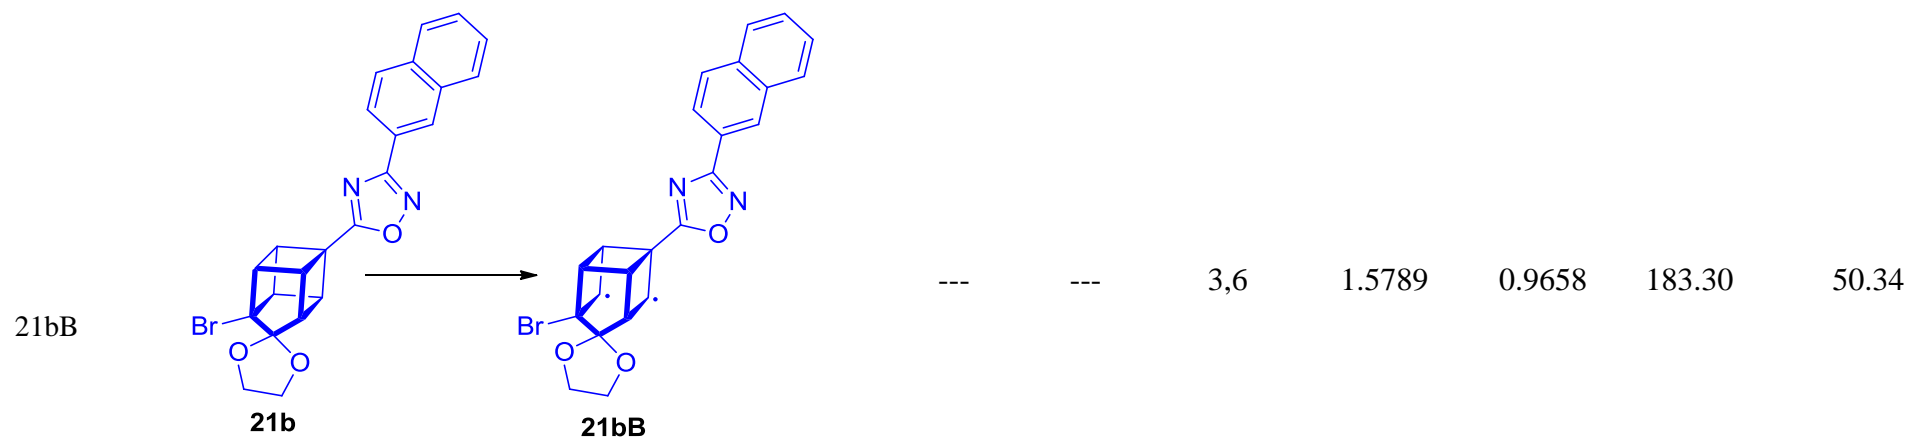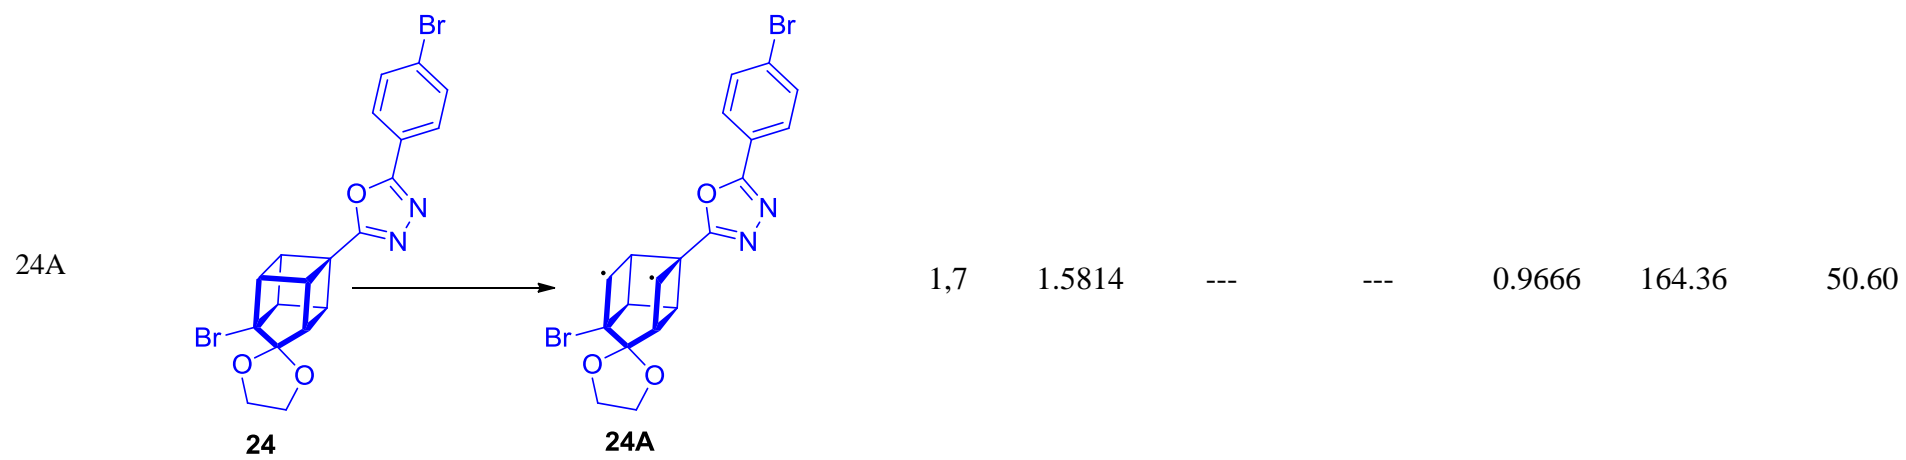

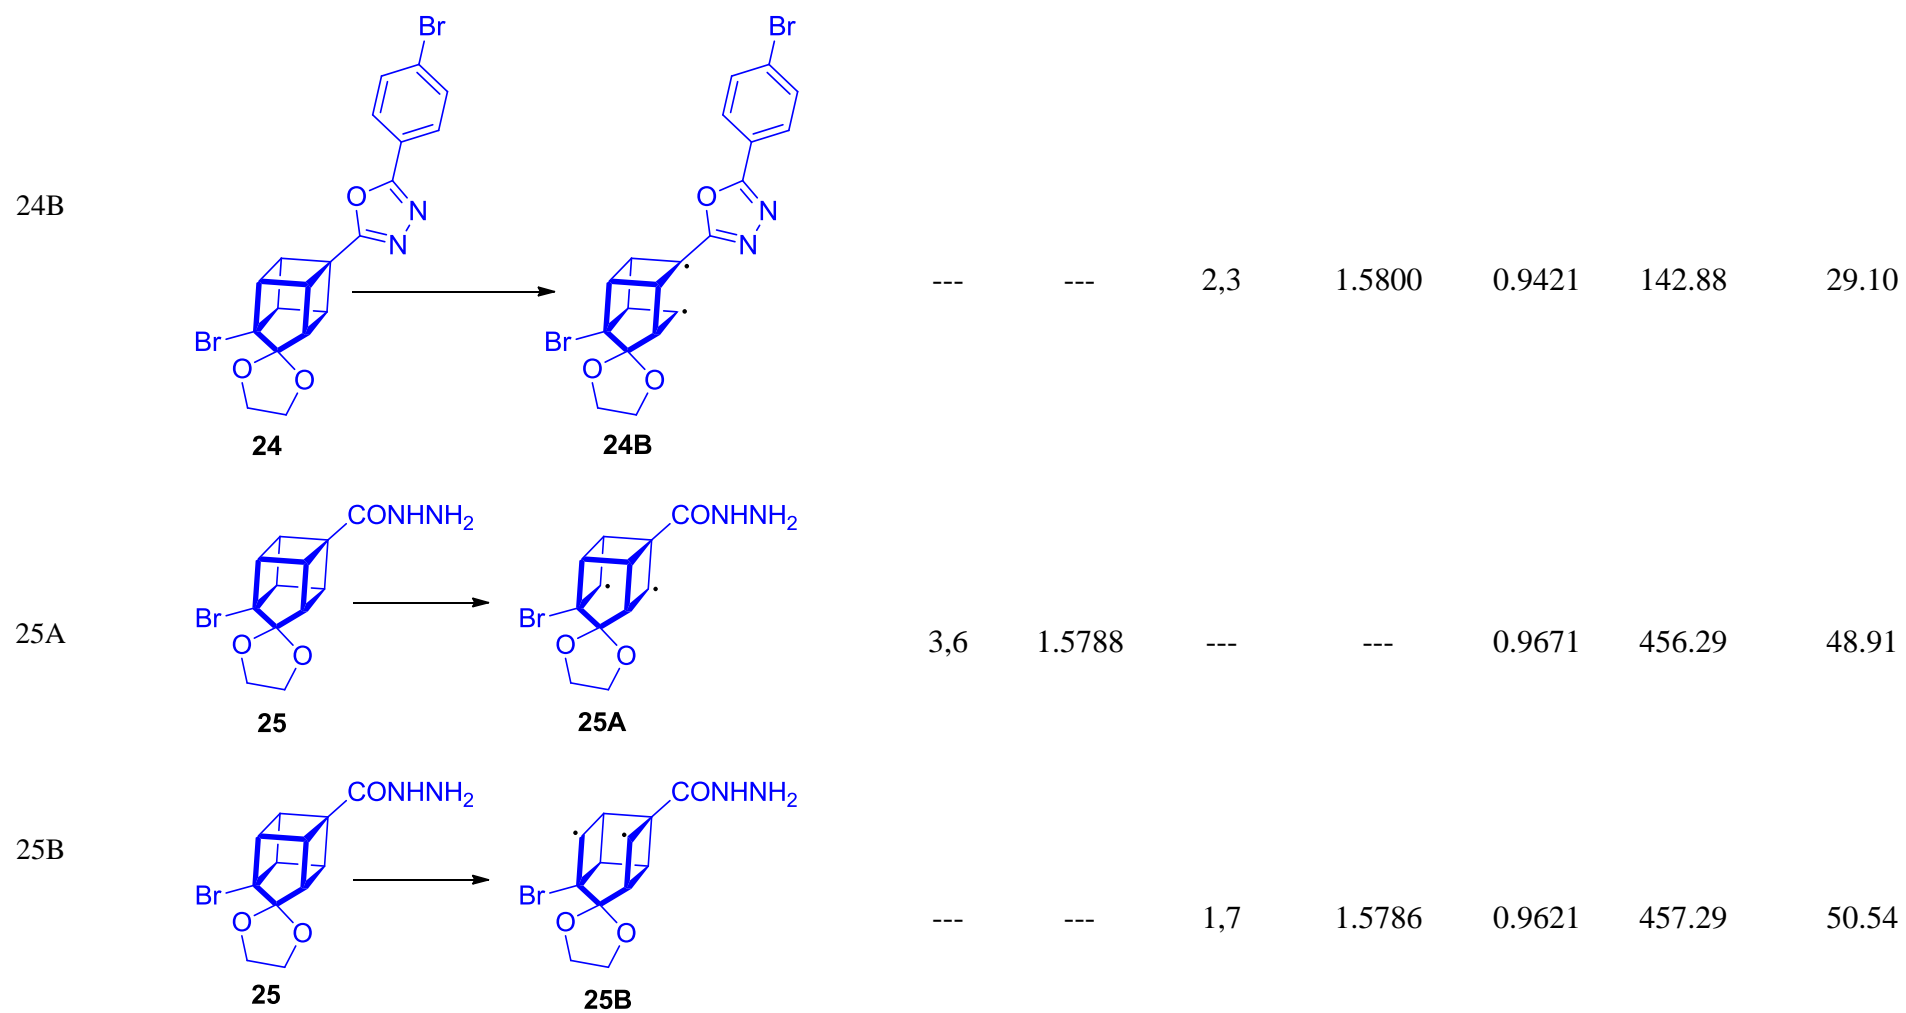

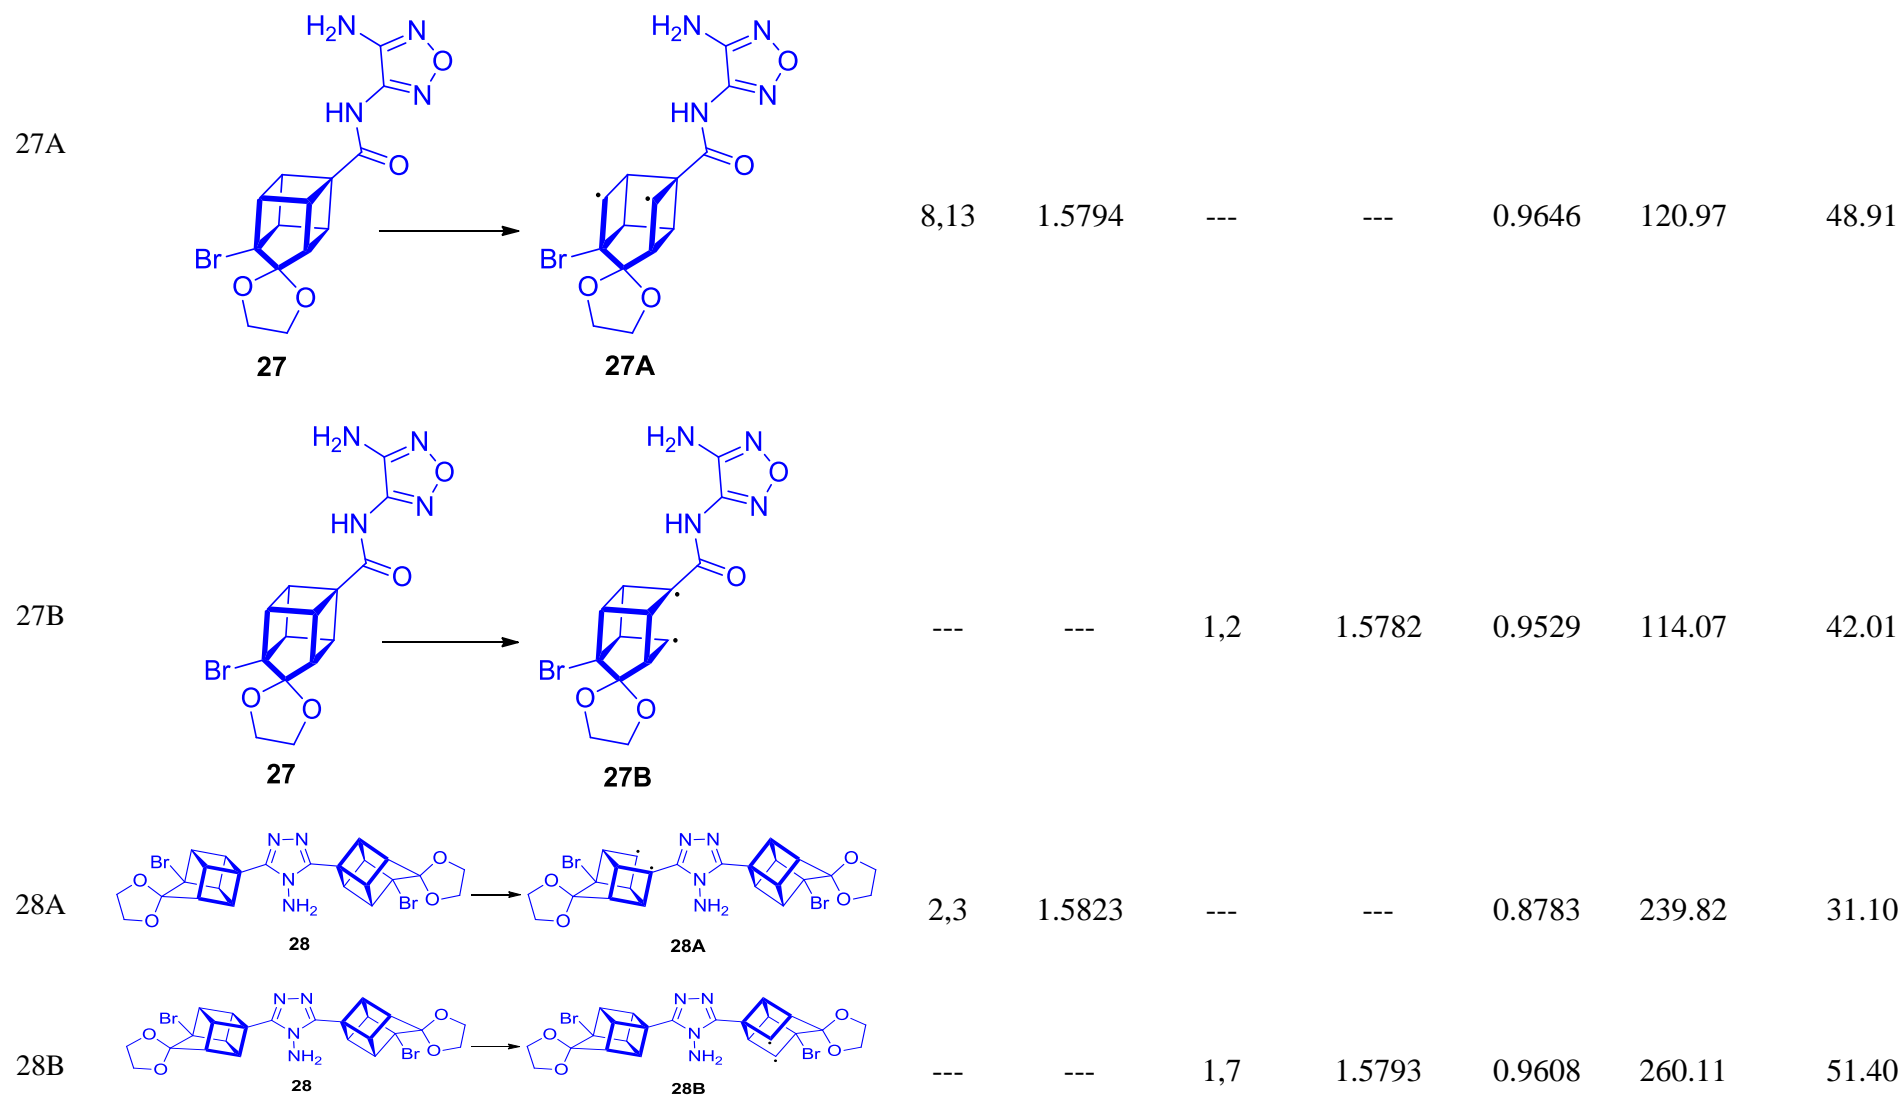



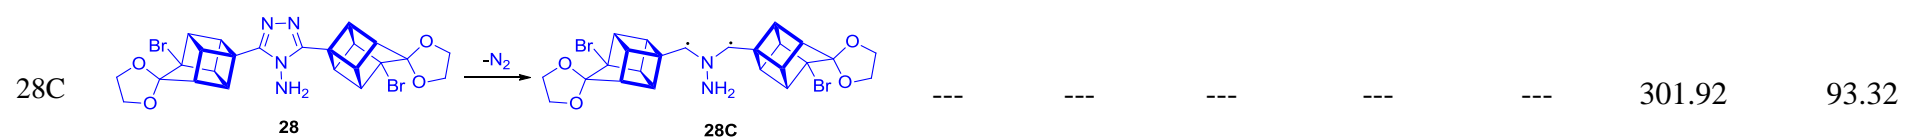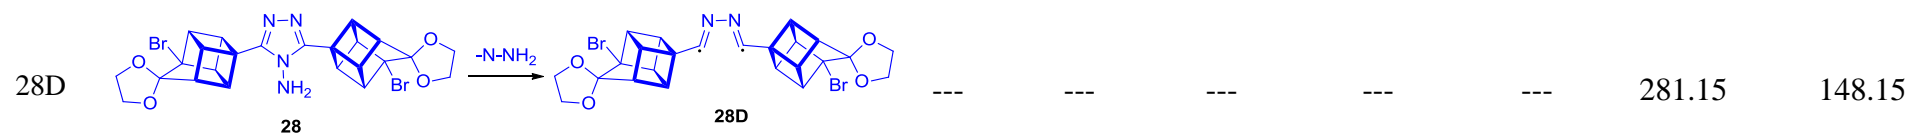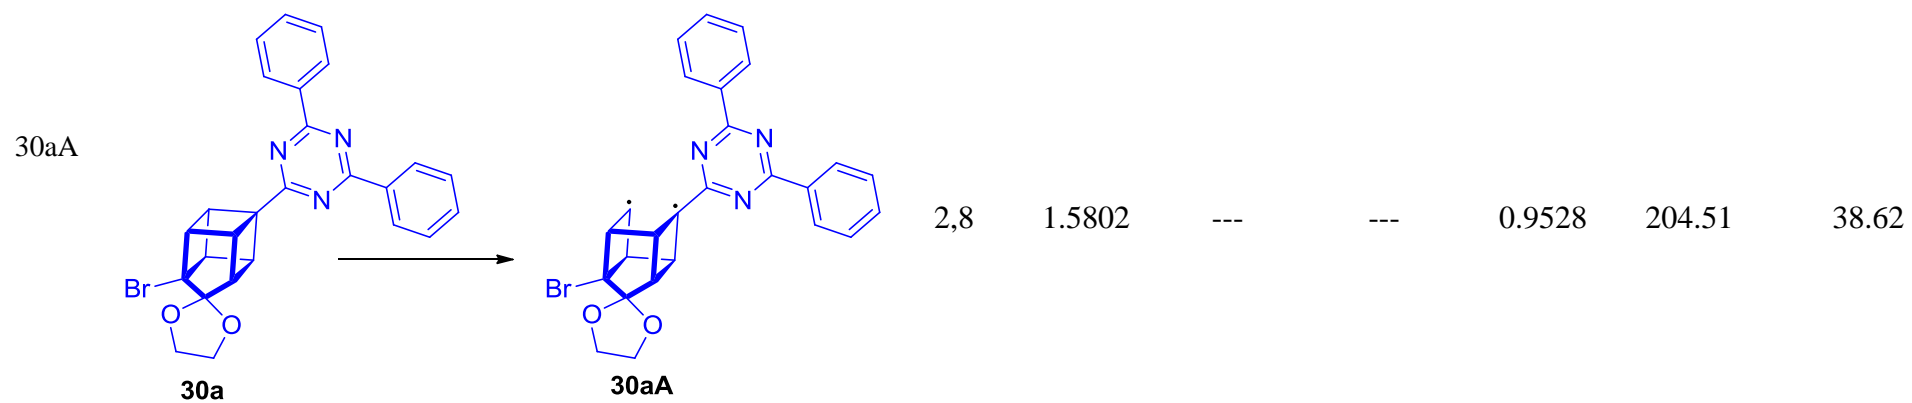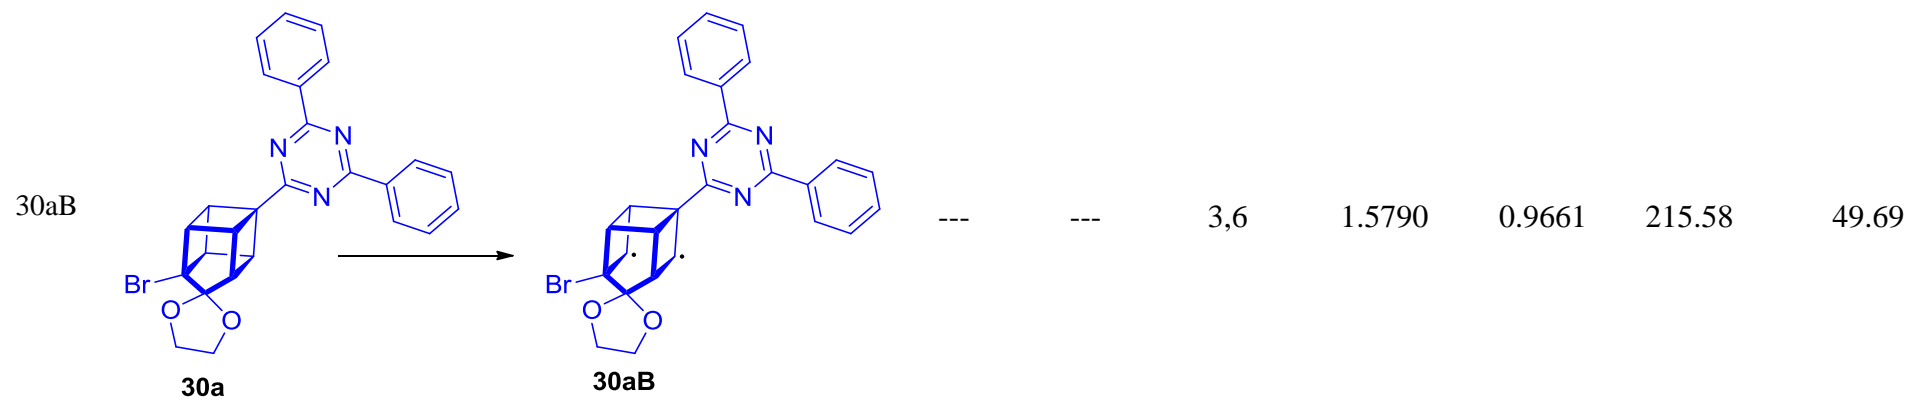

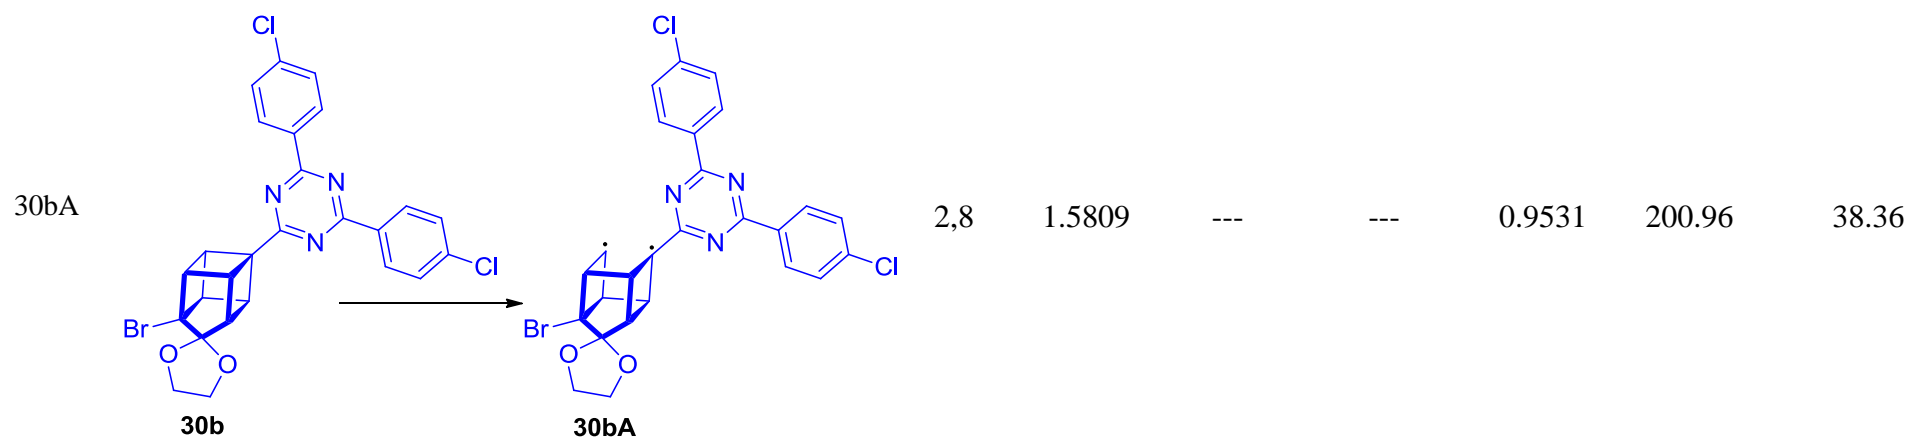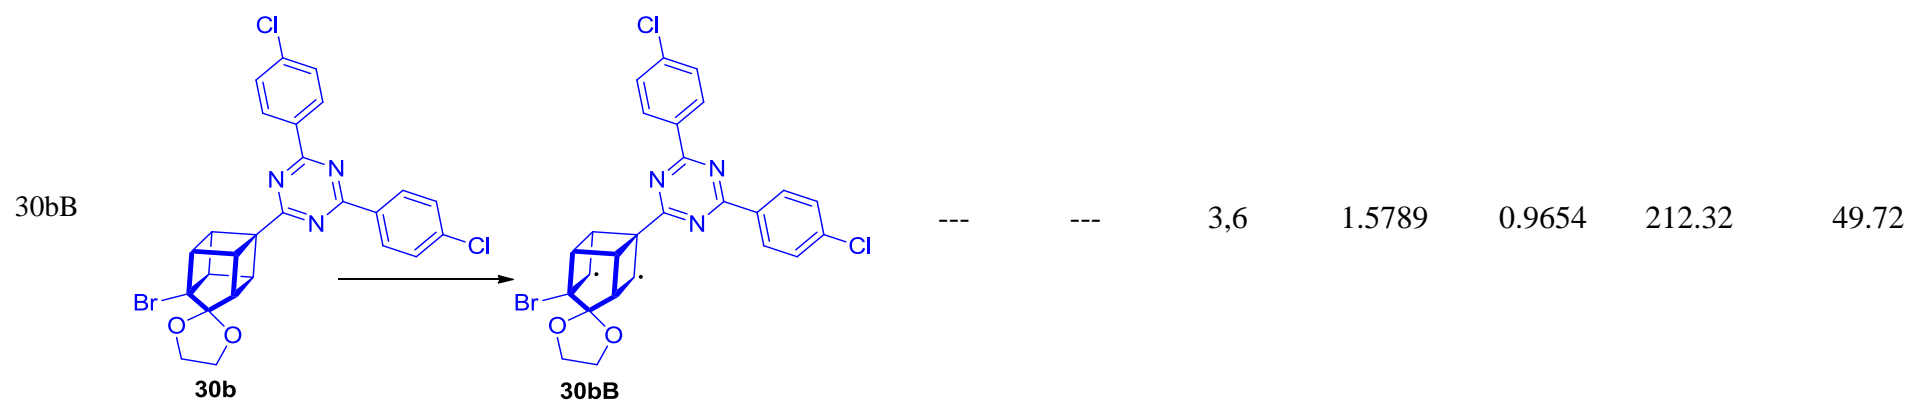

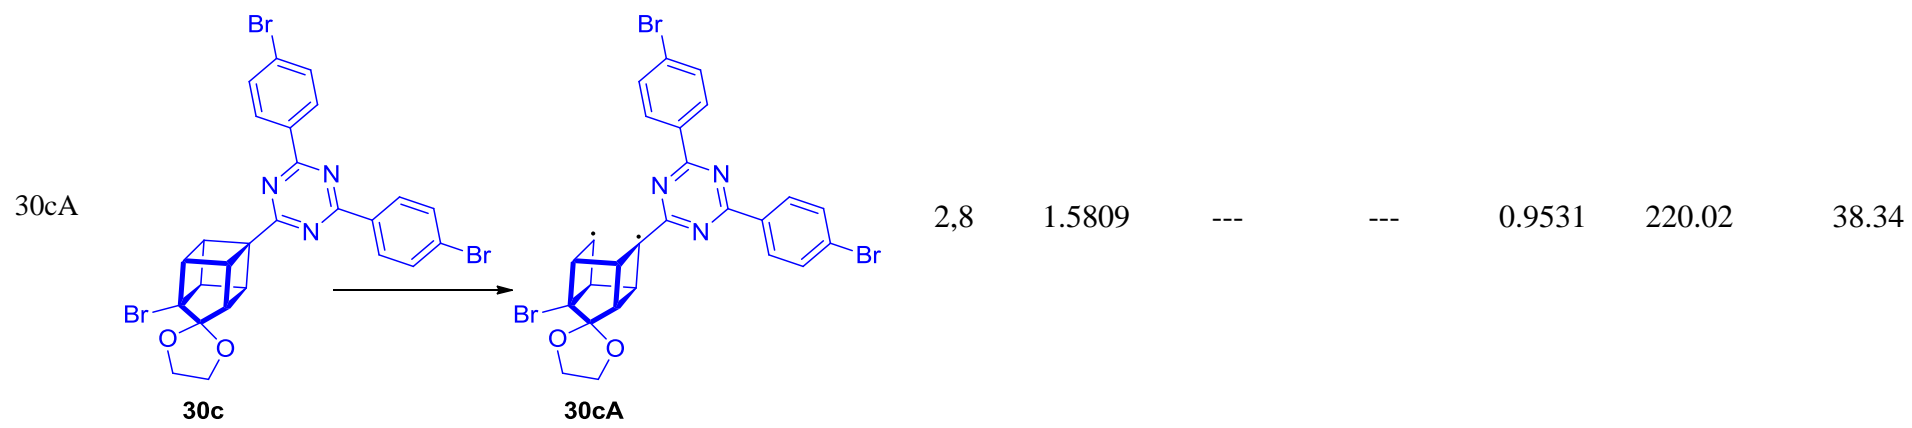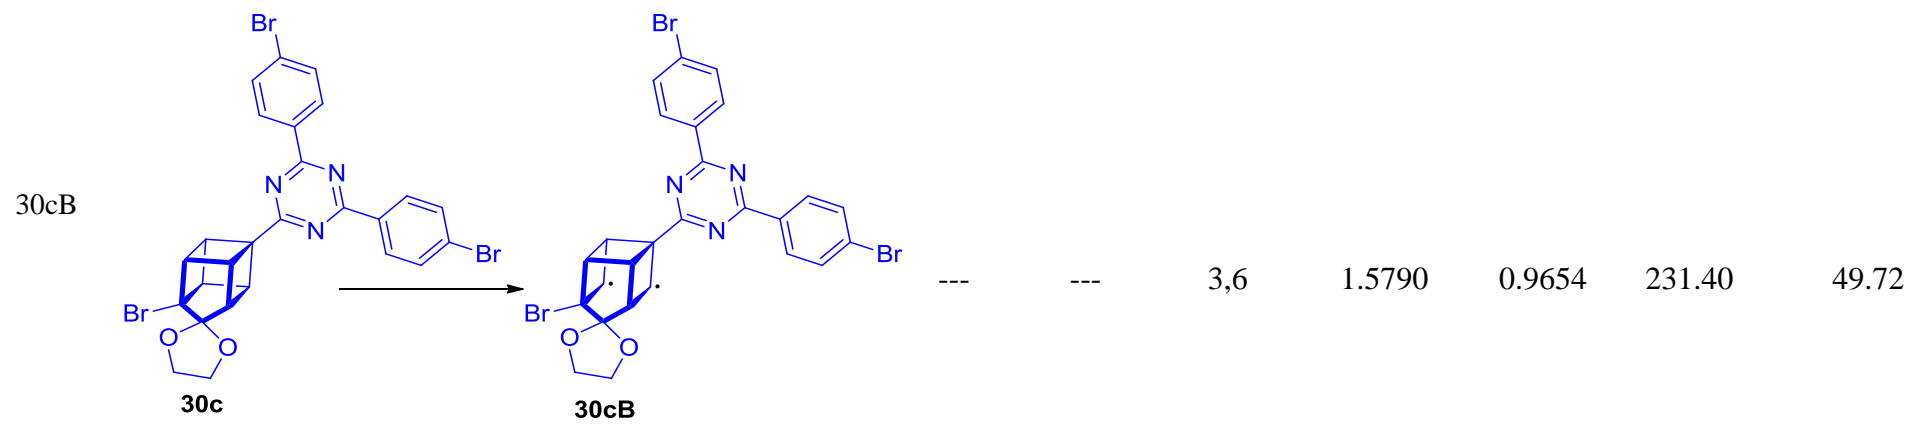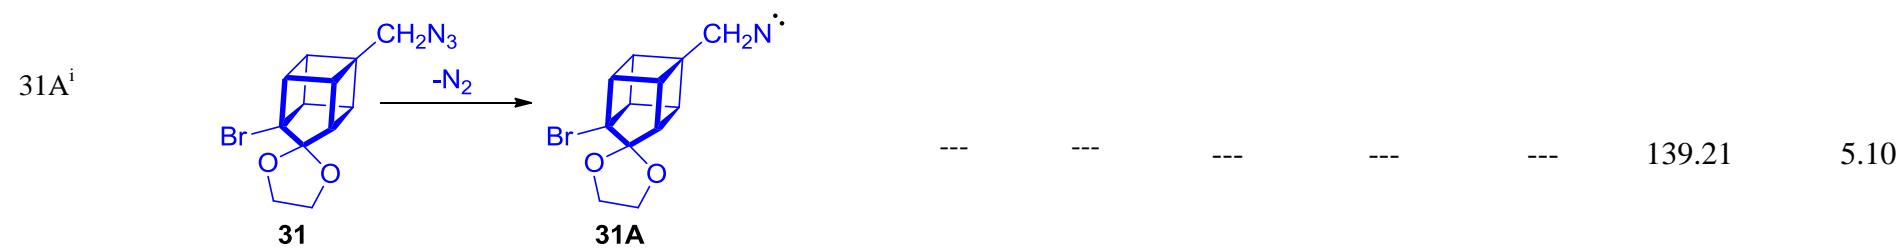

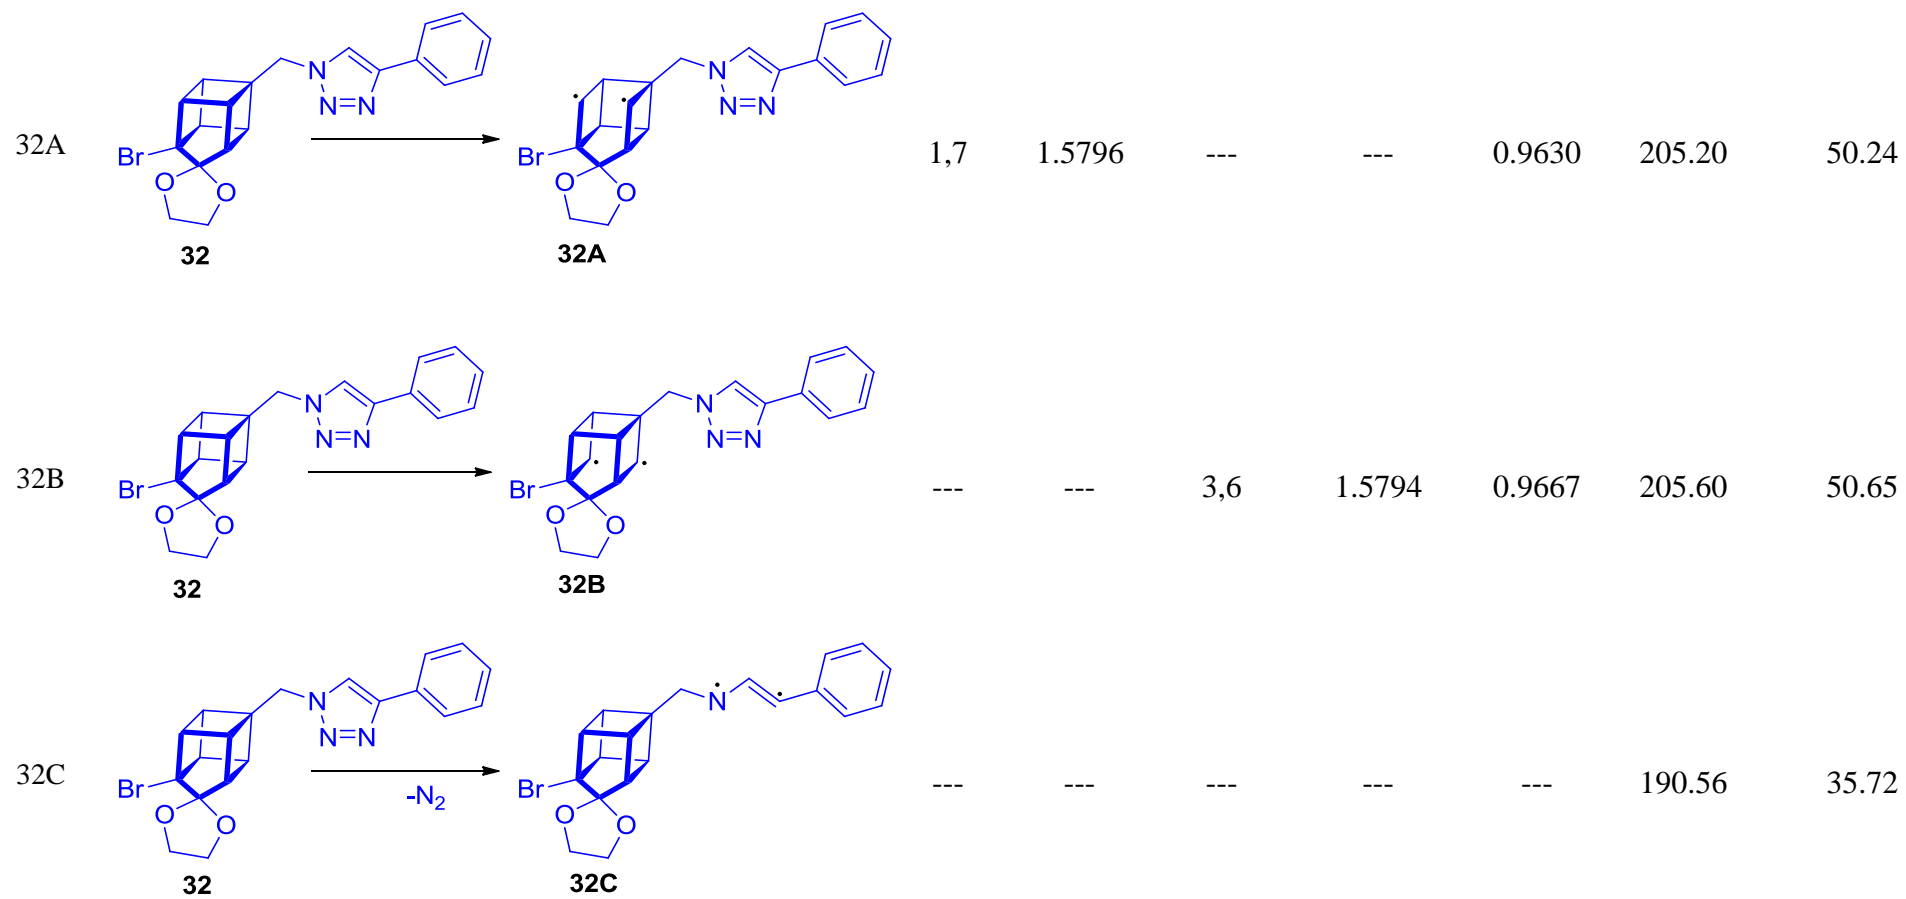

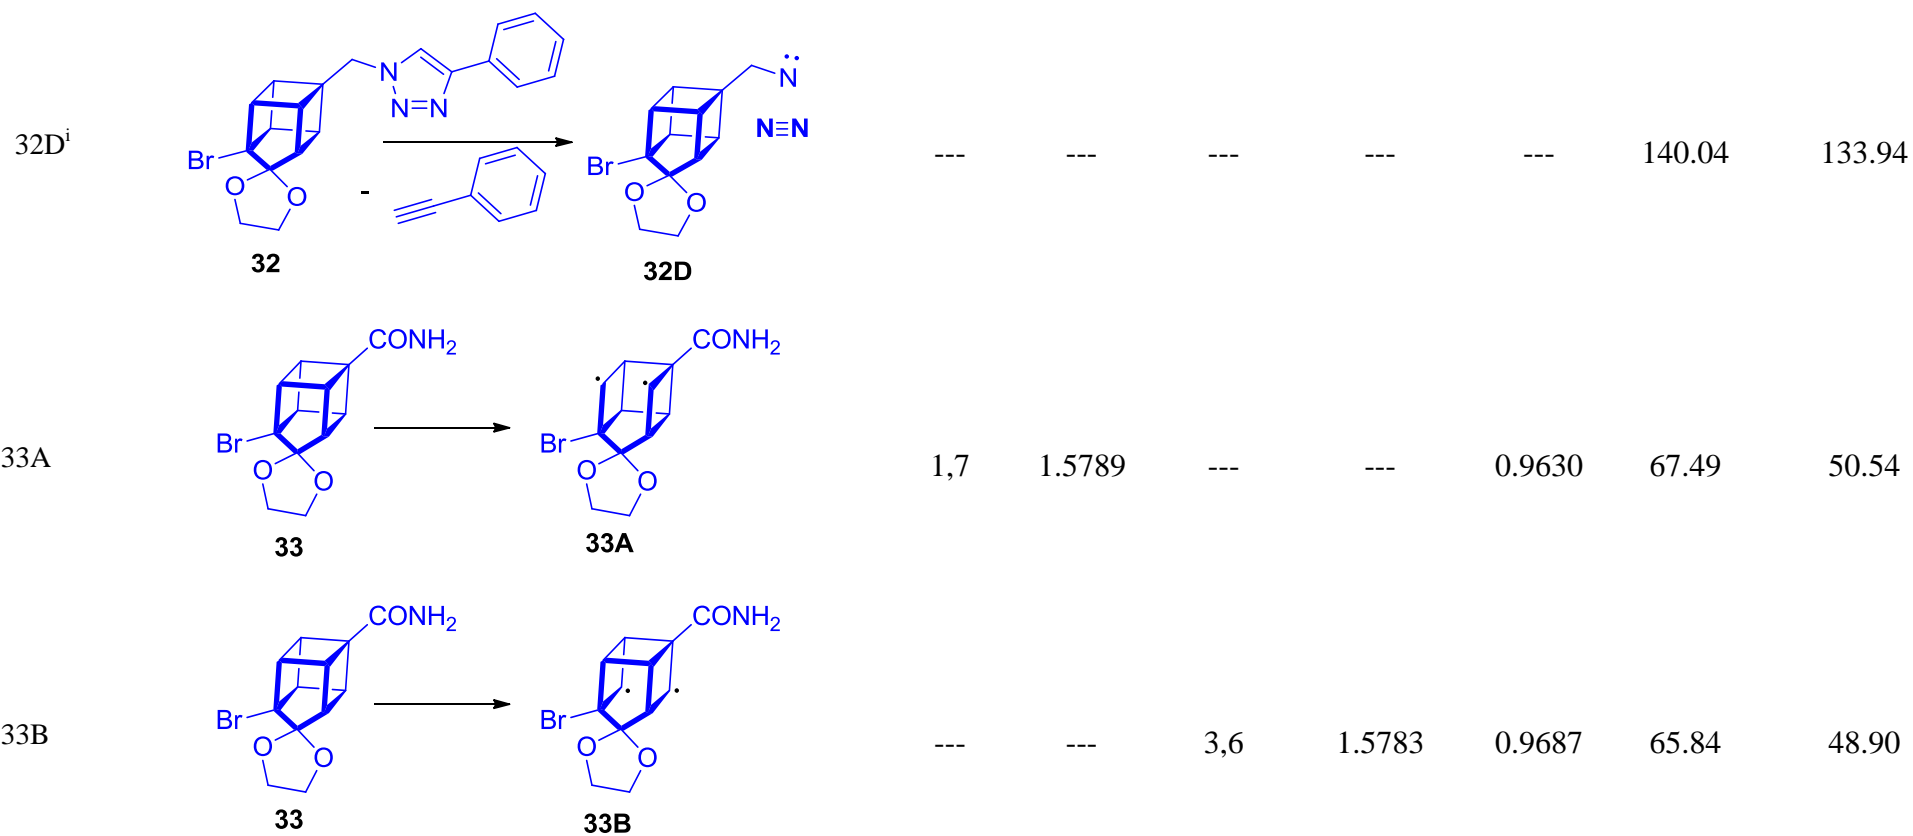

<sup>a</sup>Method: B3LYP/6-311++G (d,p); <sup>b</sup>Longest bond (LB), numbering taken from optimized geometry; <sup>c</sup>Longest bond length (LBL); <sup>d</sup>Second longest bond (SLB), numbering taken from optimized geometry; <sup>e</sup>Second longest bond length (SLBL); <sup>f</sup>Bond order (BO). <sup>g</sup>Heat of Formation (HOF); <sup>h</sup>Bond dissociation energy (BDE); <sup>i</sup> Loss of N<sub>2</sub> via N-N bond cleavage to form nitrene is the overwhelmingly preferred pathway.

**Table S4.** Atomic coordinates for optimized structure of compound **8** obtained using the B3LYP/6-311++G(d,p) level of theory

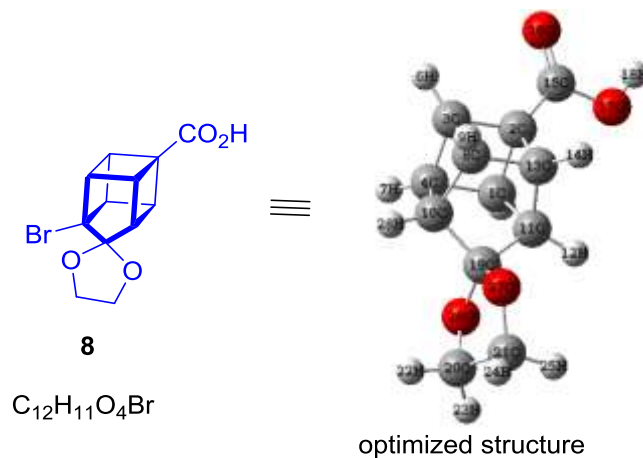

| Center Number | Atomic Symbol | Coordinates (Angstroms) |          |           |
|---------------|---------------|-------------------------|----------|-----------|
|               |               | X                       | Y        | Z         |
| 1             | C             | 0.823486                | 2.314801 | 0.691627  |
| 2             | C             | 0.157983                | 1.802746 | -0.643601 |
| 3             | C             | -1.102676               | 2.667917 | -0.369168 |
| 4             | C             | -0.465321               | 3.183838 | 0.967023  |
| 5             | H             | 1.199563                | 1.661489 | 1.474394  |
| 6             | H             | -2.133603               | 2.352936 | -0.501611 |
| 7             | H             | -0.932519               | 3.145984 | 1.946725  |
| 8             | C             | -0.420866               | 3.895084 | -1.066905 |
| 9             | H             | -0.848020               | 4.481606 | -1.875064 |
| 10            | C             | -0.103247               | 4.541316 | 0.308085  |
| 11            | C             | 1.761145                | 3.276607 | -0.091803 |
| 12            | H             | 2.816851                | 3.023098 | -0.155347 |
| 13            | C             | 0.869288                | 3.026047 | -1.340243 |
| 14            | H             | 1.285621                | 2.997537 | -2.343674 |
| 15            | C             | 0.184260                | 0.404462 | -1.131688 |

|    |    |           |           |           |
|----|----|-----------|-----------|-----------|
| 16 | O  | -0.780250 | -0.275865 | -1.387095 |
| 17 | O  | 1.457791  | -0.056619 | -1.268851 |
| 18 | H  | 1.397576  | -0.969814 | -1.587701 |
| 19 | C  | 1.433440  | 4.693673  | 0.396139  |
| 20 | C  | 2.464504  | 6.259408  | 1.732585  |
| 21 | C  | 2.889510  | 6.475259  | 0.284988  |
| 22 | H  | 1.694770  | 6.972416  | 2.041638  |
| 23 | H  | 3.291269  | 6.271401  | 2.443314  |
| 24 | H  | 2.834037  | 7.513518  | -0.043010 |
| 25 | H  | 3.893842  | 6.079848  | 0.092584  |
| 26 | O  | 1.928515  | 4.930151  | 1.698091  |
| 27 | O  | 1.913005  | 5.724173  | -0.443480 |
| 28 | Br | -1.175198 | 6.084842  | 0.830083  |

**Table S5.** Atomic coordinates for optimized structure of compound **13** obtained using the B3LYP/6-311++G(d,p) level of theory

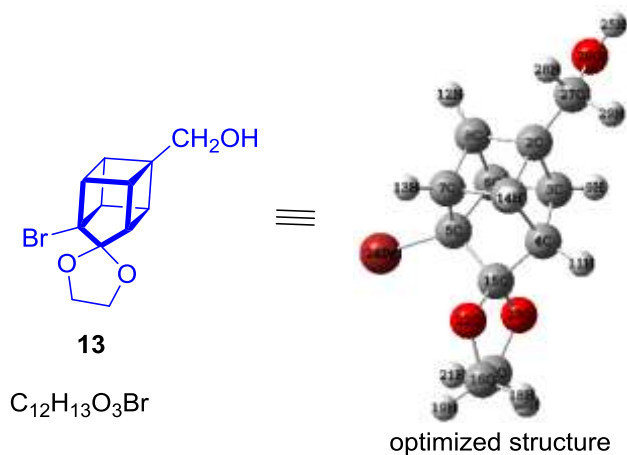

| Center | Atomic | Coordinates (Angstroms) |           |           |
|--------|--------|-------------------------|-----------|-----------|
| Number | Symbol | X                       | Y         | Z         |
| 1      | C      | -0.056669               | -0.659057 | -0.287511 |

|    |    |           |           |           |
|----|----|-----------|-----------|-----------|
| 2  | C  | 1.425173  | -1.171159 | -0.202620 |
| 3  | C  | 1.851937  | 0.338582  | -0.175738 |
| 4  | C  | 0.425018  | 0.785997  | -0.613933 |
| 5  | C  | 0.302644  | 0.758036  | 1.668295  |
| 6  | C  | 1.766513  | 0.318227  | 1.400901  |
| 7  | C  | -0.141752 | -0.679854 | 1.290535  |
| 8  | C  | 1.339357  | -1.187812 | 1.359267  |
| 9  | H  | 2.747948  | 0.738515  | -0.643604 |
| 10 | H  | 2.586548  | 0.726364  | 1.984363  |
| 11 | H  | 0.288938  | 1.159720  | -1.627142 |
| 12 | H  | 1.713305  | -1.963538 | 2.023036  |
| 13 | H  | -0.998414 | -1.141283 | 1.773953  |
| 14 | H  | -0.851496 | -1.135828 | -0.858563 |
| 15 | C  | -0.114154 | 1.685578  | 0.503816  |
| 16 | C  | -1.754003 | 3.285307  | 0.238064  |
| 17 | C  | -0.493531 | 3.936946  | 0.794343  |
| 18 | H  | -1.873564 | 3.482420  | -0.834110 |
| 19 | H  | -2.666349 | 3.564344  | 0.766249  |
| 20 | H  | -0.213973 | 4.862522  | 0.290046  |
| 21 | H  | -0.565644 | 4.105389  | 1.872898  |
| 22 | O  | -1.513866 | 1.893497  | 0.462873  |
| 23 | O  | 0.508719  | 2.954747  | 0.506529  |
| 24 | Br | -0.118382 | 1.367517  | 3.477311  |
| 25 | H  | 3.769582  | -3.062466 | -1.323771 |
| 26 | O  | 3.396197  | -2.364572 | -0.777306 |
| 27 | C  | 2.005602  | -2.225978 | -1.088273 |
| 28 | H  | 1.476685  | -3.177059 | -0.927026 |
| 29 | H  | 1.871137  | -1.940461 | -2.142570 |

---



**Table S6.** Atomic coordinates for optimized structure of compound **14** obtained using the B3LYP/6-311++G(d,p) level of theory

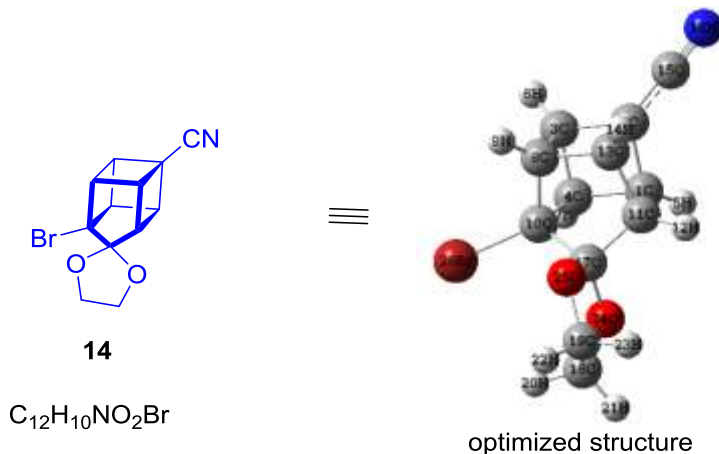

| Center Number | Atomic Symbol | Coordinates (Angstroms) |           |           |
|---------------|---------------|-------------------------|-----------|-----------|
|               |               | X                       | Y         | Z         |
| 1             | C             | 0.918422                | 2.423166  | 0.883943  |
| 2             | C             | 0.309052                | 1.693212  | -0.373930 |
| 3             | C             | -1.012706               | 2.527871  | -0.221470 |
| 4             | C             | -0.417293               | 3.250881  | 1.031601  |
| 5             | H             | 1.319228                | 1.904525  | 1.750192  |
| 6             | H             | -2.022273               | 2.137057  | -0.311655 |
| 7             | H             | -0.894173               | 3.320338  | 2.004520  |
| 8             | C             | -0.393113               | 3.678127  | -1.081797 |
| 9             | H             | -0.847109               | 4.120728  | -1.963222 |
| 10            | C             | -0.124654               | 4.524327  | 0.192140  |
| 11            | C             | 1.808461                | 3.317468  | -0.025929 |
| 12            | H             | 2.877037                | 3.115653  | -0.053034 |
| 13            | C             | 0.943902                | 2.852832  | -1.232884 |
| 14            | H             | 1.368696                | 2.709615  | -2.222371 |
| 15            | C             | 0.417847                | 0.296282  | -0.656753 |
| 16            | N             | 0.501172                | -0.834176 | -0.885461 |

|    |    |           |          |           |
|----|----|-----------|----------|-----------|
| 17 | C  | 1.401572  | 4.769098 | 0.260514  |
| 18 | C  | 2.347452  | 6.553114 | 1.366774  |
| 19 | C  | 2.771278  | 6.584538 | -0.096657 |
| 20 | H  | 1.544993  | 7.266773 | 1.573886  |
| 21 | H  | 3.168439  | 6.699844 | 2.068855  |
| 22 | H  | 2.670983  | 7.563079 | -0.566364 |
| 23 | H  | 3.792867  | 6.211527 | -0.233697 |
| 24 | O  | 1.869824  | 5.208659 | 1.517557  |
| 25 | O  | 1.832177  | 5.695979 | -0.712989 |
| 26 | Br | -1.279614 | 6.063797 | 0.495121  |

**Table S7.** Atomic coordinates for optimized structure of compound **15** obtained using the B3LYP/6-311++G(d,p) level of theory

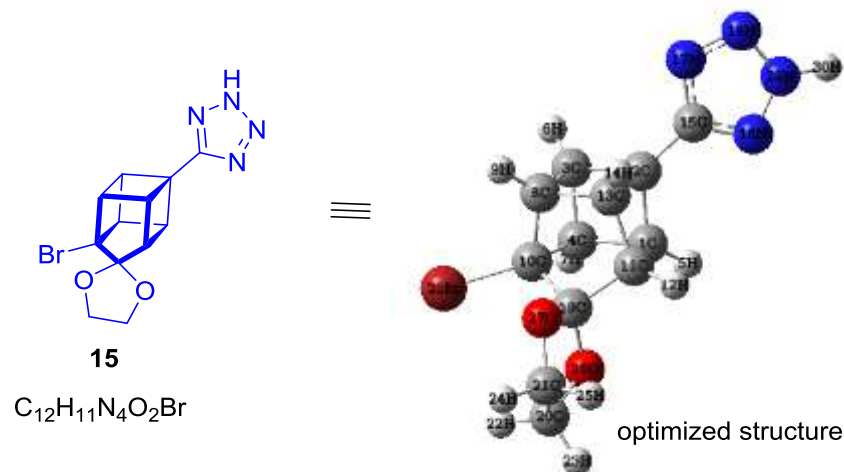

| Center Number | Atomic Symbol | Coordinates (Angstroms) |          |           |
|---------------|---------------|-------------------------|----------|-----------|
|               |               | X                       | Y        | Z         |
| 1             | C             | 0.587734                | 1.671793 | -0.490938 |
| 2             | C             | 0.107423                | 0.831047 | -1.719316 |
| 3             | C             | -0.816962               | 2.011302 | -2.183889 |

|    |    |           |           |           |
|----|----|-----------|-----------|-----------|
| 4  | C  | -0.350095 | 2.857865  | -0.951562 |
| 5  | H  | 0.541979  | 1.332864  | 0.540256  |
| 6  | H  | -1.838093 | 1.919290  | -2.544587 |
| 7  | H  | -1.003883 | 3.333547  | -0.226327 |
| 8  | C  | 0.372424  | 2.650887  | -2.972751 |
| 9  | H  | 0.353375  | 2.942486  | -4.018586 |
| 10 | C  | 0.587782  | 3.704551  | -1.852904 |
| 11 | C  | 1.943661  | 1.985982  | -1.190045 |
| 12 | H  | 2.837660  | 1.489583  | -0.818112 |
| 13 | C  | 1.310875  | 1.468120  | -2.514397 |
| 14 | H  | 1.894644  | 0.940014  | -3.263819 |
| 15 | C  | -0.231745 | -0.595379 | -1.691915 |
| 16 | N  | -0.164970 | -1.369414 | -0.610314 |
| 17 | N  | -0.656305 | -1.295163 | -2.785486 |
| 18 | N  | -0.858877 | -2.521530 | -2.392902 |
| 19 | C  | 2.025854  | 3.511825  | -1.318363 |
| 20 | C  | 3.221204  | 5.192981  | -0.295362 |
| 21 | C  | 3.994937  | 4.691276  | -1.508530 |
| 22 | H  | 2.697390  | 6.129906  | -0.506184 |
| 23 | H  | 3.827965  | 5.298786  | 0.604426  |
| 24 | H  | 4.377194  | 5.485434  | -2.150294 |
| 25 | H  | 4.814479  | 4.022633  | -1.219439 |
| 26 | O  | 2.281223  | 4.133643  | -0.074786 |
| 27 | O  | 2.998224  | 3.968488  | -2.237388 |
| 28 | Br | 0.025300  | 5.534565  | -2.232784 |
| 29 | N  | -0.559540 | -2.538439 | -1.101926 |
| 30 | H  | -0.631570 | -3.375804 | -0.541095 |

---

**Table S8.** Atomic coordinates for optimized structure of compound **16** obtained using the B3LYP/6-311++G(d,p) level of theory

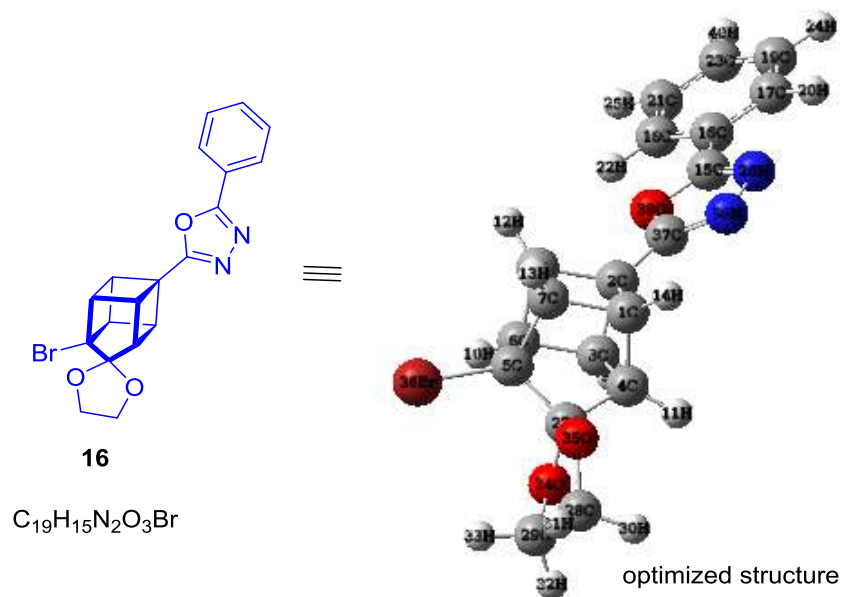

| Center Number | Atomic Symbol | Coordinates (Angstroms) |           |           |
|---------------|---------------|-------------------------|-----------|-----------|
|               |               | X                       | Y         | Z         |
| 1             | C             | 0.938883                | -0.165115 | -0.310914 |
| 2             | C             | 2.068785                | -0.780821 | 0.575660  |
| 3             | C             | 2.307304                | 0.678779  | 1.130852  |
| 4             | C             | 1.440956                | 1.278944  | -0.014387 |
| 5             | C             | -0.070965               | 0.879824  | 1.655535  |
| 6             | C             | 1.265508                | 0.399087  | 2.281590  |
| 7             | C             | -0.104125               | -0.443595 | 0.844640  |
| 8             | C             | 1.037420                | -1.046847 | 1.730594  |
| 9             | H             | 3.281482                | 1.086253  | 1.388827  |
| 10            | H             | 1.522542                | 0.650691  | 3.306292  |
| 11            | H             | 1.948167                | 1.818193  | -0.811451 |

|    |    |           |           |           |
|----|----|-----------|-----------|-----------|
| 12 | H  | 0.965428  | -1.949764 | 2.331659  |
| 13 | H  | -1.045152 | -0.931173 | 0.607844  |
| 14 | H  | 0.714484  | -0.497184 | -1.319970 |
| 15 | C  | 4.804145  | -2.971245 | 0.139818  |
| 16 | C  | 5.929175  | -3.699431 | 0.715091  |
| 17 | C  | 6.736765  | -4.484771 | -0.120723 |
| 18 | C  | 6.213113  | -3.626474 | 2.085132  |
| 19 | C  | 7.811619  | -5.185236 | 0.412462  |
| 20 | H  | 6.509295  | -4.534615 | -1.178222 |
| 21 | C  | 7.291730  | -4.332005 | 2.610634  |
| 22 | H  | 5.590990  | -3.020539 | 2.731980  |
| 23 | C  | 8.092495  | -5.111866 | 1.778018  |
| 24 | H  | 8.432698  | -5.790742 | -0.237603 |
| 25 | H  | 7.506107  | -4.272633 | 3.671521  |
| 26 | N  | 4.400778  | -2.946958 | -1.092424 |
| 27 | C  | 0.276237  | 2.012637  | 0.662218  |
| 28 | C  | -0.901017 | 3.733362  | -0.314418 |
| 29 | C  | -0.303553 | 4.215965  | 1.001971  |
| 30 | H  | -0.323600 | 4.085773  | -1.177226 |
| 31 | H  | -1.951951 | 3.992067  | -0.445220 |
| 32 | H  | 0.196379  | 5.182508  | 0.932975  |
| 33 | H  | -1.047320 | 4.235813  | 1.803893  |
| 34 | O  | 0.692104  | 3.219330  | 1.269123  |
| 35 | O  | -0.802947 | 2.310168  | -0.199071 |
| 36 | Br | -1.549698 | 1.208601  | 2.884807  |
| 37 | C  | 3.095516  | -1.686112 | 0.073142  |
| 38 | N  | 3.287687  | -2.112193 | -1.134717 |
| 39 | O  | 4.022801  | -2.191168 | 0.945035  |
| 40 | H  | 8.931715  | -5.660594 | 2.190099  |

---

**Table S9.** Atomic coordinates for optimized structure of compound **18** obtained using the B3LYP/6-311++G(d,p) level of theory

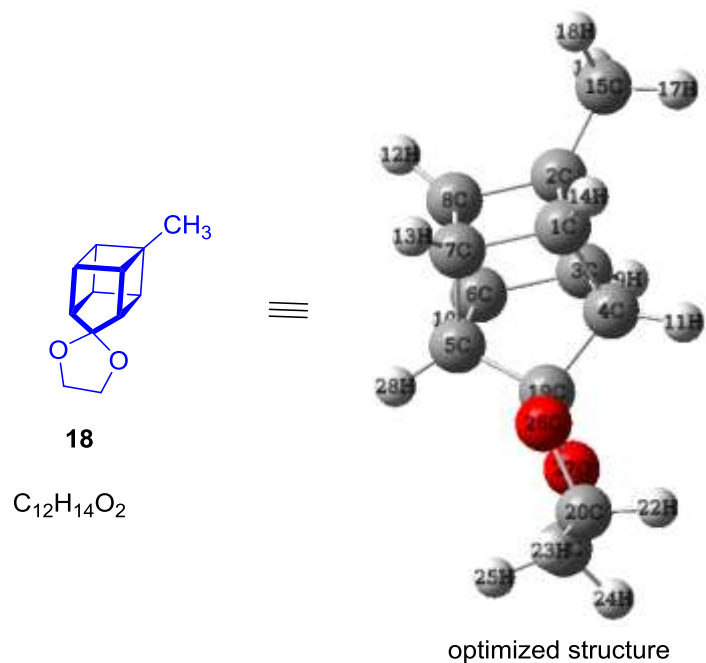

| Center Number | Atomic Symbol | Coordinates (Angstroms) |           |           |
|---------------|---------------|-------------------------|-----------|-----------|
|               |               | X                       | Y         | Z         |
| 1             | C             | -0.045859               | -0.619307 | -0.010834 |
| 2             | C             | 1.484848                | -0.980843 | -0.015977 |
| 3             | C             | 1.748647                | 0.563142  | -0.158368 |
| 4             | C             | 0.253407                | 0.825921  | -0.504257 |
| 5             | C             | 0.314653                | 1.018606  | 1.791010  |
| 6             | C             | 1.790090                | 0.694372  | 1.415781  |
| 7             | C             | -0.004041               | -0.488734 | 1.563133  |
| 8             | C             | 1.522425                | -0.844922 | 1.543511  |
| 9             | H             | 2.552617                | 1.003935  | -0.746318 |
| 10            | H             | 2.619269                | 1.226697  | 1.877304  |

|    |   |           |           |           |
|----|---|-----------|-----------|-----------|
| 11 | H | -0.001630 | 1.088169  | -1.529877 |
| 12 | H | 2.022324  | -1.515708 | 2.241898  |
| 13 | H | -0.760525 | -1.001017 | 2.154014  |
| 14 | H | -0.827153 | -1.224113 | -0.469359 |
| 15 | C | 2.126007  | -2.057958 | -0.844108 |
| 16 | H | 3.211689  | -2.076268 | -0.697533 |
| 17 | H | 1.936066  | -1.901916 | -1.912012 |
| 18 | H | 1.736639  | -3.046670 | -0.576971 |
| 19 | C | -0.274034 | 1.763951  | 0.588202  |
| 20 | C | -2.079382 | 3.165282  | 0.268790  |
| 21 | C | -0.867737 | 3.991008  | 0.681215  |
| 22 | H | -2.249420 | 3.215637  | -0.814208 |
| 23 | H | -2.998658 | 3.426360  | 0.794899  |
| 24 | H | -0.716550 | 4.891976  | 0.085147  |
| 25 | H | -0.906663 | 4.257070  | 1.745222  |
| 26 | O | -1.695891 | 1.847966  | 0.660709  |
| 27 | O | 0.211459  | 3.094452  | 0.421802  |
| 28 | H | 0.112279  | 1.443876  | 2.772802  |

---

**Table S10.** Atomic coordinates for optimized structure of compound **18a** obtained using the B3LYP/6-311++G(d,p) level of theory

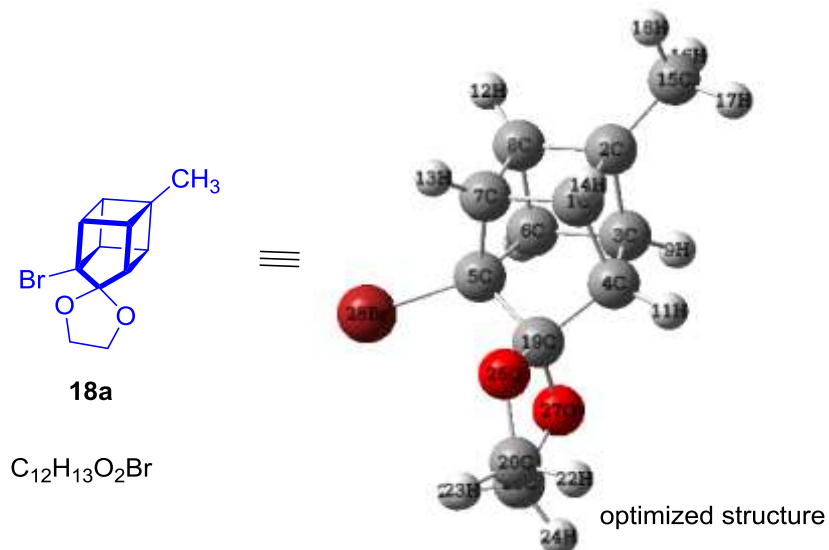

| Center Number | Atomic Symbol | Coordinates (Angstroms) |           |           |
|---------------|---------------|-------------------------|-----------|-----------|
|               |               | X                       | Y         | Z         |
| 1             | C             | -0.041731               | -0.624814 | -0.015383 |
| 2             | C             | 1.489009                | -0.983917 | -0.016762 |
| 3             | C             | 1.753796                | 0.559505  | -0.155725 |
| 4             | C             | 0.259394                | 0.821479  | -0.508767 |
| 5             | C             | 0.314194                | 1.005025  | 1.768332  |
| 6             | C             | 1.791752                | 0.686958  | 1.417816  |
| 7             | C             | -0.004066               | -0.499169 | 1.558635  |
| 8             | C             | 1.522381                | -0.851251 | 1.544711  |
| 9             | H             | 2.560532                | 1.005420  | -0.734853 |
| 10            | H             | 2.602477                | 1.232150  | 1.892959  |
| 11            | H             | 0.010196                | 1.079573  | -1.536399 |
| 12            | H             | 2.018845                | -1.519415 | 2.246238  |
| 13            | H             | -0.765518               | -0.993463 | 2.155511  |



|    |    |           |           |           |
|----|----|-----------|-----------|-----------|
| 14 | H  | -0.824972 | -1.227771 | -0.471603 |
| 15 | C  | 2.133387  | -2.059156 | -0.844064 |
| 16 | H  | 3.218220  | -2.076504 | -0.693268 |
| 17 | H  | 1.947160  | -1.902042 | -1.912192 |
| 18 | H  | 1.743714  | -3.047990 | -0.579029 |
| 19 | C  | -0.282351 | 1.771070  | 0.565416  |
| 20 | C  | -2.090094 | 3.175950  | 0.291517  |
| 21 | C  | -0.864217 | 3.996584  | 0.675475  |
| 22 | H  | -2.309020 | 3.250395  | -0.780539 |
| 23 | H  | -2.984104 | 3.421214  | 0.865823  |
| 24 | H  | -0.717755 | 4.885978  | 0.061626  |
| 25 | H  | -0.873742 | 4.270946  | 1.734584  |
| 26 | O  | -1.694399 | 1.843188  | 0.626128  |
| 27 | O  | 0.208687  | 3.087718  | 0.402861  |
| 28 | Br | -0.030129 | 1.746097  | 3.544187  |

**Table S11.** Atomic coordinates for optimized structure of compound **19** obtained using the B3LYP/6-311++G(d,p) level of theory

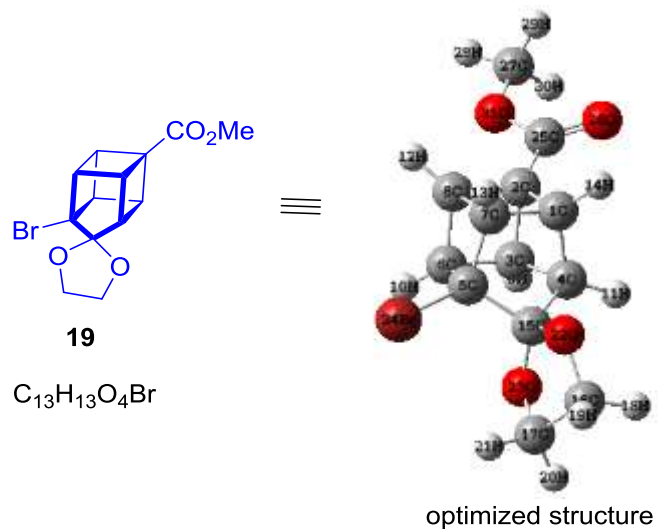

| Center | Atomic | Coordinates (Angstroms) |           |           |
|--------|--------|-------------------------|-----------|-----------|
| Number | Symbol | X                       | Y         | Z         |
| 1      | C      | -0.198179               | -0.647122 | -0.093952 |
| 2      | C      | 1.285371                | -1.135606 | -0.072338 |
| 3      | C      | 1.688867                | 0.391357  | -0.170416 |
| 4      | C      | 0.229075                | 0.781490  | -0.540627 |
| 5      | C      | 0.262968                | 0.899215  | 1.743682  |
| 6      | C      | 1.715775                | 0.471185  | 1.404115  |
| 7      | C      | -0.171523               | -0.568224 | 1.485591  |
| 8      | C      | 1.322927                | -1.041435 | 1.486958  |
| 9      | H      | 2.543150                | 0.760404  | -0.732128 |
| 10     | H      | 2.563272                | 0.934955  | 1.900217  |
| 11     | H      | 0.023561                | 1.081003  | -1.565892 |
| 12     | H      | 1.759172                | -1.770410 | 2.164206  |
| 13     | H      | -0.977709               | -1.020948 | 2.055634  |
| 14     | H      | -1.006710               | -1.179463 | -0.587199 |
| 15     | C      | -0.249062               | 1.743789  | 0.553454  |
| 16     | C      | -1.926367               | 3.299072  | 0.281104  |
| 17     | C      | -0.646218               | 4.005812  | 0.710245  |
| 18     | H      | -2.112469               | 3.411588  | -0.793497 |
| 19     | H      | -2.810464               | 3.604896  | 0.841113  |
| 20     | H      | -0.412490               | 4.894466  | 0.123237  |
| 21     | H      | -0.655433               | 4.252506  | 1.776025  |
| 22     | O      | -1.649064               | 1.930873  | 0.595984  |
| 23     | O      | 0.354122                | 3.016588  | 0.435203  |
| 24     | Br     | -0.045257               | 1.614294  | 3.533676  |
| 25     | C      | 1.848292                | -2.179140 | -0.966502 |
| 26     | O      | 1.365311                | -2.529847 | -2.018753 |
| 27     | C      | 3.669656                | -3.658243 | -1.294304 |
| 28     | H      | 4.567318                | -3.935093 | -0.745804 |
| 29     | H      | 3.027193                | -4.527069 | -1.443714 |

|    |   |          |           |           |
|----|---|----------|-----------|-----------|
| 30 | H | 3.927842 | -3.233653 | -2.265525 |
| 31 | O | 3.006174 | -2.676670 | -0.475457 |

**Table S12.** Atomic coordinates for optimized structure of compound **21a** obtained using the B3LYP/6-311++G(d,p) level of theory

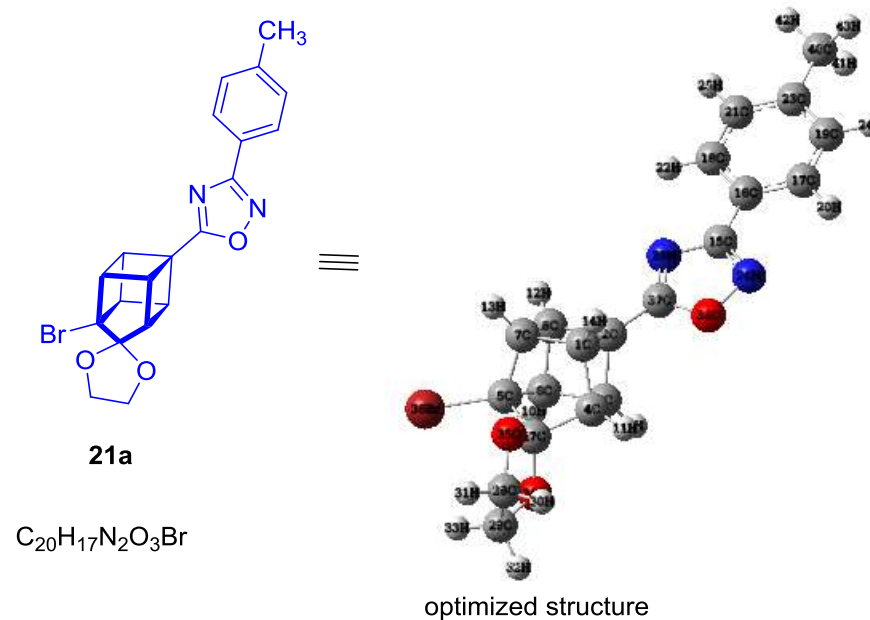

| Center Number | Atomic Symbol | Coordinates (Angstroms) |           |           |
|---------------|---------------|-------------------------|-----------|-----------|
|               |               | X                       | Y         | Z         |
| 1             | C             | 1.186202                | -0.221006 | 0.002163  |
| 2             | C             | 2.451638                | -0.460645 | 0.916304  |
| 3             | C             | 2.445646                | 1.099161  | 1.151929  |
| 4             | C             | 1.437793                | 1.313404  | -0.012931 |
| 5             | C             | 0.095076                | 0.999251  | 1.812846  |
| 6             | C             | 1.521433                | 0.878482  | 2.412870  |

|    |    |           |           |           |
|----|----|-----------|-----------|-----------|
| 7  | C  | 0.263441  | -0.442876 | 1.264194  |
| 8  | C  | 1.532389  | -0.667140 | 2.154974  |
| 9  | H  | 3.342544  | 1.704828  | 1.250958  |
| 10 | H  | 1.775565  | 1.364174  | 3.350325  |
| 11 | H  | 1.807095  | 1.763510  | -0.931723 |
| 12 | H  | 1.650674  | -1.437601 | 2.911021  |
| 13 | H  | -0.585165 | -1.116652 | 1.191175  |
| 14 | H  | 0.979840  | -0.775777 | -0.909315 |
| 15 | C  | 5.177879  | -2.659927 | 0.376986  |
| 16 | C  | 6.039979  | -3.813574 | 0.661201  |
| 17 | C  | 7.141767  | -4.111300 | -0.153508 |
| 18 | C  | 5.764683  | -4.637766 | 1.756450  |
| 19 | C  | 7.943010  | -5.208532 | 0.129255  |
| 20 | H  | 7.360247  | -3.480293 | -1.006419 |
| 21 | C  | 6.575671  | -5.735789 | 2.030102  |
| 22 | H  | 4.912804  | -4.413664 | 2.386088  |
| 23 | C  | 7.677723  | -6.040485 | 1.226448  |
| 24 | H  | 8.790132  | -5.427011 | -0.513227 |
| 25 | H  | 6.345369  | -6.366899 | 2.882318  |
| 26 | N  | 5.376763  | -1.850839 | -0.635418 |
| 27 | C  | 0.191457  | 1.960420  | 0.605720  |
| 28 | C  | -1.301496 | 3.241686  | -0.587629 |
| 29 | C  | -0.744730 | 4.065820  | 0.566974  |
| 30 | H  | -0.824327 | 3.500992  | -1.540035 |
| 31 | H  | -2.385130 | 3.299196  | -0.691672 |
| 32 | H  | -0.418258 | 5.065689  | 0.279509  |
| 33 | H  | -1.450039 | 4.128369  | 1.400914  |
| 34 | O  | 0.414492  | 3.312785  | 0.949134  |
| 35 | O  | -0.960626 | 1.904137  | -0.208952 |
| 36 | Br | -1.364232 | 1.308890  | 3.068488  |
| 37 | C  | 3.616447  | -1.269065 | 0.561544  |
| 38 | O  | 4.336134  | -0.914419 | -0.520984 |
| 39 | N  | 4.081566  | -2.327599 | 1.153504  |

|    |   |          |           |          |
|----|---|----------|-----------|----------|
| 40 | C | 8.570933 | -7.216369 | 1.535024 |
| 41 | H | 9.508419 | -6.885766 | 1.995269 |
| 42 | H | 8.090545 | -7.911190 | 2.226729 |
| 43 | H | 8.832289 | -7.766410 | 0.627103 |

**Table S13.** Atomic coordinates for optimized structure of compound **21b** obtained using the B3LYP/6-311++G(d,p) level of theory

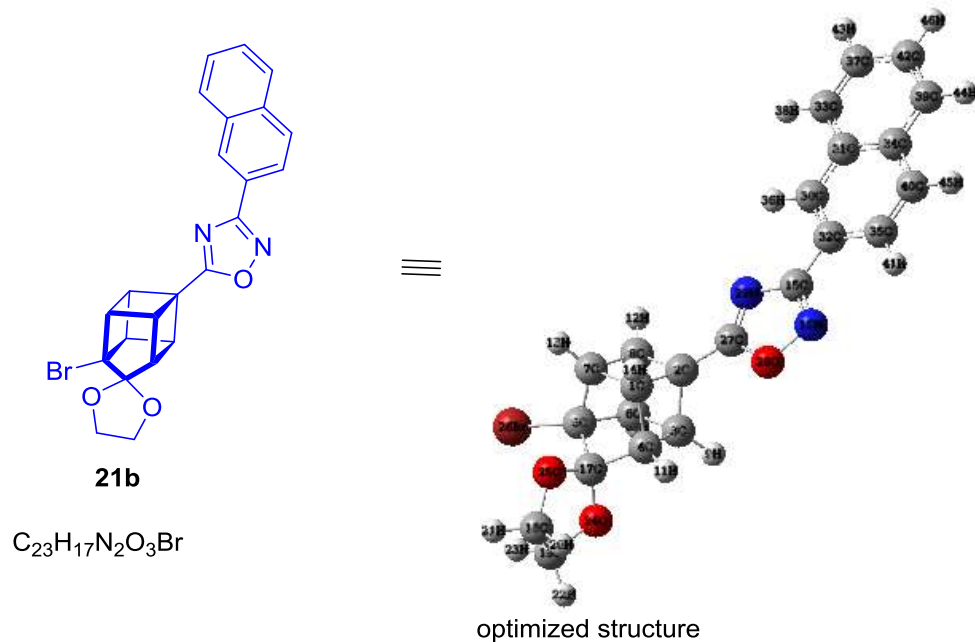

| Center<br>Number | Atomic<br>Symbol | Coordinates (Angstroms) |           |           |
|------------------|------------------|-------------------------|-----------|-----------|
|                  |                  | X                       | Y         | Z         |
| 1                | C                | 1.078127                | -0.003752 | -0.282008 |
| 2                | C                | 2.186597                | -0.009599 | 0.843739  |
| 3                | C                | 2.107817                | 1.564261  | 0.781892  |
| 4                | C                | 1.294733                | 1.513849  | -0.542607 |

|    |    |           |           |           |
|----|----|-----------|-----------|-----------|
| 5  | C  | -0.315799 | 1.463411  | 1.081935  |
| 6  | C  | 0.998785  | 1.526084  | 1.905044  |
| 7  | C  | -0.029117 | -0.043081 | 0.842231  |
| 8  | C  | 1.085367  | -0.038247 | 1.943098  |
| 9  | H  | 2.963064  | 2.223811  | 0.903026  |
| 10 | H  | 1.088958  | 2.184352  | 2.764072  |
| 11 | H  | 1.795473  | 1.810125  | -1.461644 |
| 12 | H  | 1.098234  | -0.653527 | 2.837804  |
| 13 | H  | -0.839792 | -0.761707 | 0.766228  |
| 14 | H  | 1.033608  | -0.723349 | -1.095214 |
| 15 | C  | 4.999276  | -2.146446 | 1.121810  |
| 16 | N  | 5.356294  | -1.493116 | 0.042437  |
| 17 | C  | -0.049431 | 2.195571  | -0.254355 |
| 18 | C  | -1.372359 | 3.158964  | -1.872783 |
| 19 | C  | -1.028423 | 4.202630  | -0.817177 |
| 20 | H  | -0.760413 | 3.275949  | -2.774882 |
| 21 | H  | -2.427639 | 3.134326  | -2.145196 |
| 22 | H  | -0.694027 | 5.155194  | -1.228952 |
| 23 | H  | -1.855085 | 4.365525  | -0.119463 |
| 24 | O  | 0.081968  | 3.597478  | -0.140766 |
| 25 | O  | -1.052915 | 1.929810  | -1.212201 |
| 26 | Br | -1.964646 | 1.913444  | 2.021012  |
| 27 | C  | 3.408682  | -0.810544 | 0.823719  |
| 28 | O  | 4.298014  | -0.594829 | -0.166285 |
| 29 | N  | 3.781868  | -1.746349 | 1.643471  |
| 30 | C  | 5.382396  | -3.864620 | 2.847470  |
| 31 | C  | 6.157883  | -4.891124 | 3.441758  |
| 32 | C  | 5.821640  | -3.205535 | 1.717830  |
| 33 | C  | 5.726075  | -5.583305 | 4.603965  |
| 34 | C  | 7.414209  | -5.241187 | 2.854365  |
| 35 | C  | 7.071784  | -3.556037 | 1.134689  |
| 36 | H  | 4.429812  | -3.592621 | 3.286391  |
| 37 | C  | 6.499509  | -6.574548 | 5.159666  |

|    |   |          |           |          |
|----|---|----------|-----------|----------|
| 38 | H | 4.772767 | -5.315828 | 5.047545 |
| 39 | C | 8.187968 | -6.267912 | 3.452219 |
| 40 | C | 7.840116 | -4.544415 | 1.690547 |
| 41 | H | 7.404571 | -3.030350 | 0.248534 |
| 42 | C | 7.742142 | -6.919670 | 4.578439 |
| 43 | H | 6.159624 | -7.096538 | 6.046977 |
| 44 | H | 9.140939 | -6.532817 | 3.006100 |
| 45 | H | 8.792543 | -4.808339 | 1.242917 |
| 46 | H | 8.343240 | -7.703127 | 5.026111 |

**Table S14.** Atomic coordinates for optimized structure of compound **24** obtained using the B3LYP/6-311++G(d,p) level of theory

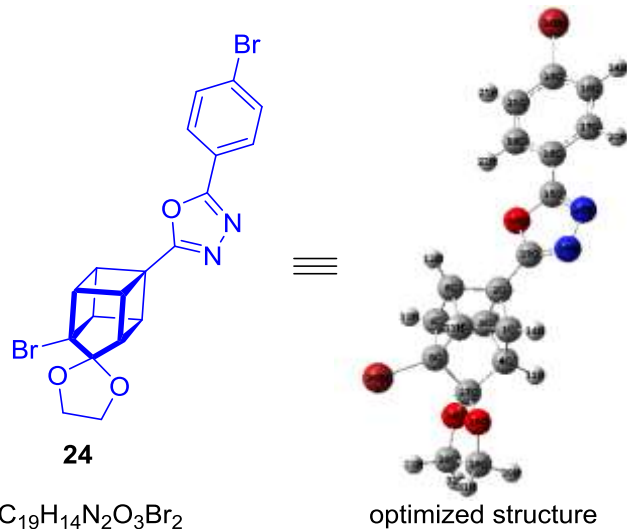

| Center Number | Atomic Symbol | Coordinates (Angstroms) |           |           |
|---------------|---------------|-------------------------|-----------|-----------|
|               |               | X                       | Y         | Z         |
| 1             | C             | 0.938781                | -0.166019 | -0.308058 |
| 2             | C             | 2.073501                | -0.777103 | 0.575687  |
| 3             | C             | 2.310034                | 0.684550  | 1.127178  |

|    |    |           |           |           |
|----|----|-----------|-----------|-----------|
| 4  | C  | 1.437915  | 1.279896  | -0.016128 |
| 5  | C  | -0.066903 | 0.879770  | 1.660239  |
| 6  | C  | 1.273315  | 0.404103  | 2.282225  |
| 7  | C  | -0.099106 | -0.445254 | 0.851908  |
| 8  | C  | 1.047203  | -1.043547 | 1.734985  |
| 9  | H  | 3.284121  | 1.095068  | 1.380649  |
| 10 | H  | 1.533464  | 0.658388  | 3.305455  |
| 11 | H  | 1.940726  | 1.819043  | -0.816018 |
| 12 | H  | 0.979824  | -1.945533 | 2.337991  |
| 13 | H  | -1.039425 | -0.936227 | 0.619456  |
| 14 | H  | 0.711573  | -0.500608 | -1.315656 |
| 15 | C  | 4.809735  | -2.964120 | 0.136684  |
| 16 | C  | 5.933067  | -3.694650 | 0.709266  |
| 17 | C  | 6.743234  | -4.475481 | -0.127366 |
| 18 | C  | 6.217273  | -3.632115 | 2.078934  |
| 19 | C  | 7.818547  | -5.181947 | 0.395108  |
| 20 | H  | 6.521686  | -4.522166 | -1.186263 |
| 21 | C  | 7.292702  | -4.338081 | 2.609029  |
| 22 | H  | 5.597581  | -3.031695 | 2.733059  |
| 23 | C  | 8.084287  | -5.107401 | 1.761586  |
| 24 | H  | 8.443268  | -5.784062 | -0.251646 |
| 25 | H  | 7.510183  | -4.289523 | 3.667972  |
| 26 | N  | 4.409670  | -2.935639 | -1.096248 |
| 27 | C  | 0.273490  | 2.011667  | 0.663415  |
| 28 | C  | -0.911876 | 3.727095  | -0.312440 |
| 29 | C  | -0.310694 | 4.214164  | 1.000606  |
| 30 | H  | -0.338781 | 4.079041  | -1.178259 |
| 31 | H  | -1.964007 | 3.982504  | -0.439765 |
| 32 | H  | 0.186793  | 5.181627  | 0.927474  |
| 33 | H  | -1.051373 | 4.234163  | 1.805325  |
| 34 | O  | 0.688400  | 3.220318  | 1.266447  |
| 35 | O  | -0.809440 | 2.304222  | -0.194397 |
| 36 | Br | -1.541510 | 1.206173  | 2.894351  |



|    |    |          |           |           |
|----|----|----------|-----------|-----------|
| 37 | C  | 3.101029 | -1.680143 | 0.071720  |
| 38 | Br | 9.564288 | -6.081816 | 2.485304  |
| 39 | N  | 3.296427 | -2.101783 | -1.137441 |
| 40 | O  | 4.027581 | -2.188517 | 0.943862  |

**Table S15.** Atomic coordinates for optimized structure of compound **25** obtained using the B3LYP/6-311++G(d,p) level of theory

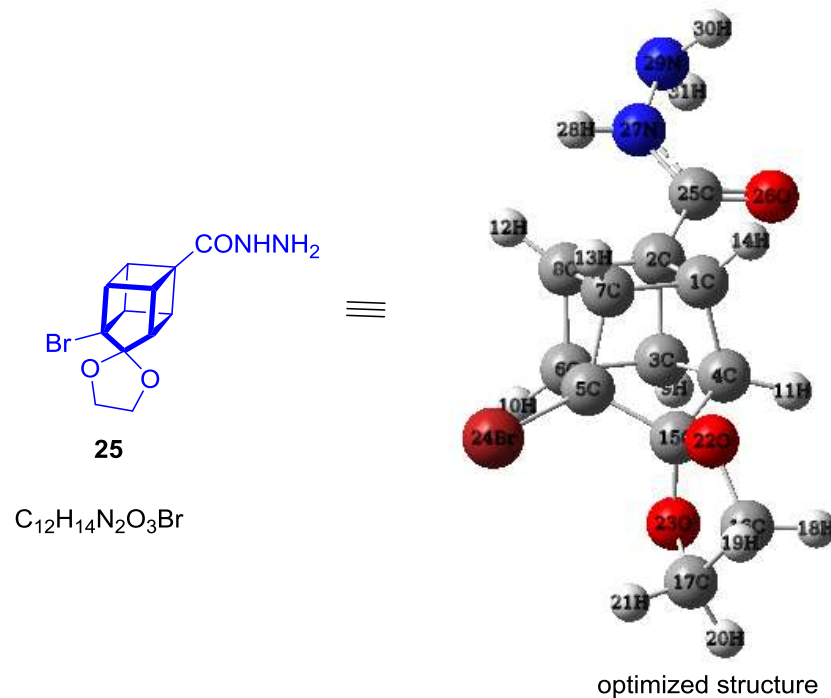

| Center | Atomic | Coordinates (Angstroms) |           |           |
|--------|--------|-------------------------|-----------|-----------|
| Number | Symbol | X                       | Y         | Z         |
| 1      | C      | 0.018988                | -0.716590 | 0.002534  |
| 2      | C      | 1.549942                | -1.058078 | -0.116286 |
| 3      | C      | 1.774299                | 0.488678  | -0.297228 |

|    |    |           |           |           |
|----|----|-----------|-----------|-----------|
| 4  | C  | 0.254904  | 0.725840  | -0.527805 |
| 5  | C  | 0.496937  | 0.932234  | 1.738220  |
| 6  | C  | 1.944346  | 0.630796  | 1.265955  |
| 7  | C  | 0.186398  | -0.578520 | 1.566172  |
| 8  | C  | 1.712085  | -0.909235 | 1.435873  |
| 9  | H  | 2.525456  | 0.919208  | -0.954112 |
| 10 | H  | 2.787014  | 1.189586  | 1.662829  |
| 11 | H  | -0.077048 | 0.960589  | -1.536140 |
| 12 | H  | 2.268777  | -1.549504 | 2.118429  |
| 13 | H  | -0.514701 | -1.082802 | 2.225087  |
| 14 | H  | -0.773164 | -1.346848 | -0.392777 |
| 15 | C  | -0.207793 | 1.678232  | 0.581704  |
| 16 | C  | -2.049370 | 3.045636  | 0.400520  |
| 17 | C  | -0.817015 | 3.899110  | 0.676442  |
| 18 | H  | -2.334781 | 3.073642  | -0.657725 |
| 19 | H  | -2.910557 | 3.296829  | 1.020045  |
| 20 | H  | -0.725339 | 4.766961  | 0.022563  |
| 21 | H  | -0.764113 | 4.213085  | 1.723213  |
| 22 | O  | -1.607601 | 1.733285  | 0.761889  |
| 23 | O  | 0.254548  | 2.997626  | 0.370824  |
| 24 | Br | 0.292588  | 1.684646  | 3.526547  |
| 25 | C  | 2.078758  | -2.072514 | -1.076284 |
| 26 | O  | 1.829985  | -2.031406 | -2.274177 |
| 27 | N  | 2.858807  | -3.052173 | -0.527820 |
| 28 | H  | 3.081293  | -3.055217 | 0.454148  |
| 29 | N  | 3.456150  | -4.072768 | -1.287461 |
| 30 | H  | 2.718039  | -4.606228 | -1.741329 |
| 31 | H  | 3.994505  | -3.639637 | -2.034695 |

---

**Table S16.** Atomic coordinates for optimized structure of compound **27** obtained using the B3LYP/6-311++G(d,p) level of theory

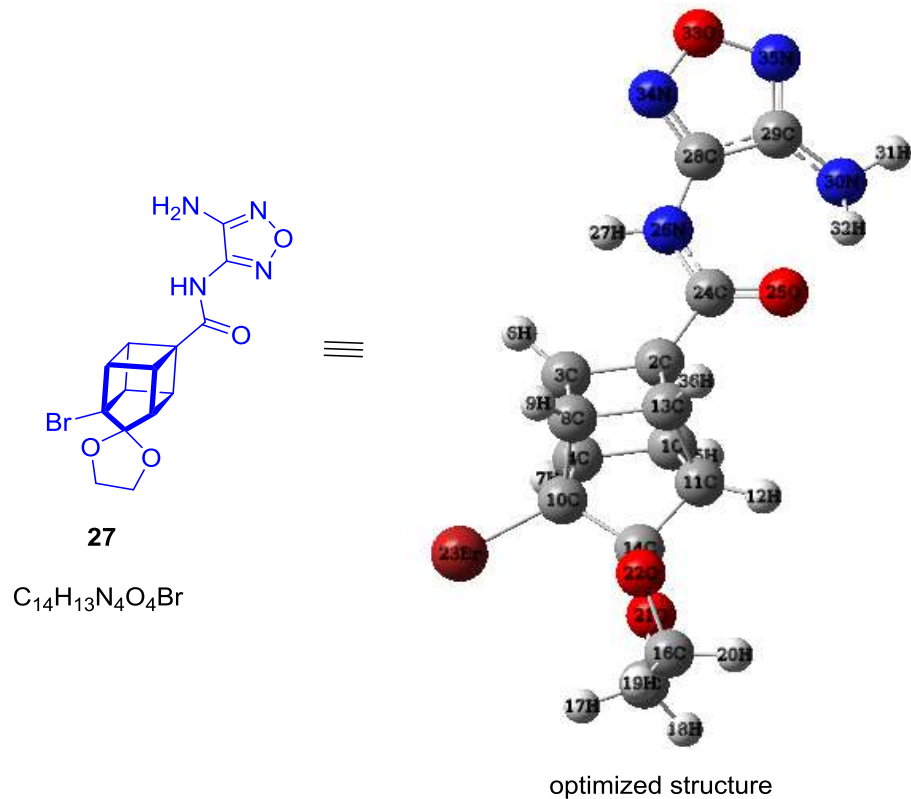

| Center Number | Atomic Symbol | Coordinates (Angstroms) |           |           |
|---------------|---------------|-------------------------|-----------|-----------|
|               |               | X                       | Y         | Z         |
| 1             | C             | -0.248865               | 1.243570  | -1.542881 |
| 2             | C             | -0.079952               | -0.315316 | -1.722198 |
| 3             | C             | 0.264352                | -0.110559 | -3.235873 |
| 4             | C             | 0.091750                | 1.437633  | -3.070924 |
| 5             | H             | -1.141662               | 1.709975  | -1.134930 |
| 6             | H             | -0.088418               | -0.687566 | -4.089775 |

|    |    |           |           |           |
|----|----|-----------|-----------|-----------|
| 7  | H  | -0.545576 | 2.069385  | -3.682586 |
| 8  | C  | 1.771033  | 0.102759  | -2.864410 |
| 9  | H  | 2.607666  | -0.440512 | -3.293777 |
| 10 | C  | 1.631069  | 1.637094  | -3.051797 |
| 11 | C  | 1.130831  | 1.354423  | -0.835663 |
| 12 | H  | 1.142195  | 1.537688  | 0.235900  |
| 13 | C  | 1.426864  | -0.087682 | -1.334774 |
| 14 | C  | 1.985423  | 2.293790  | -1.697148 |
| 15 | C  | 2.752778  | 4.456387  | -1.483329 |
| 16 | C  | 3.773154  | 3.494134  | -0.886100 |
| 17 | H  | 3.051160  | 4.804703  | -2.476361 |
| 18 | H  | 2.523386  | 5.309020  | -0.843645 |
| 19 | H  | 4.799505  | 3.685859  | -1.199344 |
| 20 | H  | 3.719260  | 3.470619  | 0.208518  |
| 21 | O  | 1.576754  | 3.640090  | -1.573711 |
| 22 | O  | 3.369759  | 2.232544  | -1.430064 |
| 23 | Br | 2.437167  | 2.414937  | -4.646208 |
| 24 | C  | -0.952587 | -1.302549 | -1.029609 |
| 25 | O  | -1.015356 | -1.363628 | 0.191906  |
| 26 | N  | -1.688078 | -2.115775 | -1.862505 |
| 27 | H  | -1.482609 | -2.077452 | -2.851227 |
| 28 | C  | -2.527852 | -3.164590 | -1.481244 |
| 29 | C  | -3.364342 | -3.341084 | -0.318040 |
| 30 | N  | -3.556227 | -2.475116 | 0.725016  |
| 31 | H  | -4.081674 | -2.861682 | 1.496439  |
| 32 | H  | -2.722554 | -1.954559 | 0.980956  |
| 33 | O  | -3.626052 | -4.977392 | -1.692833 |
| 34 | N  | -2.706188 | -4.169695 | -2.290201 |
| 35 | N  | -4.013486 | -4.468526 | -0.463516 |
| 36 | H  | 2.008654  | -0.788836 | -0.742739 |

---

**Table S17.** Atomic coordinates for optimized structure of compound **28** obtained using the B3LYP/6-311++G(d,p) level of theory

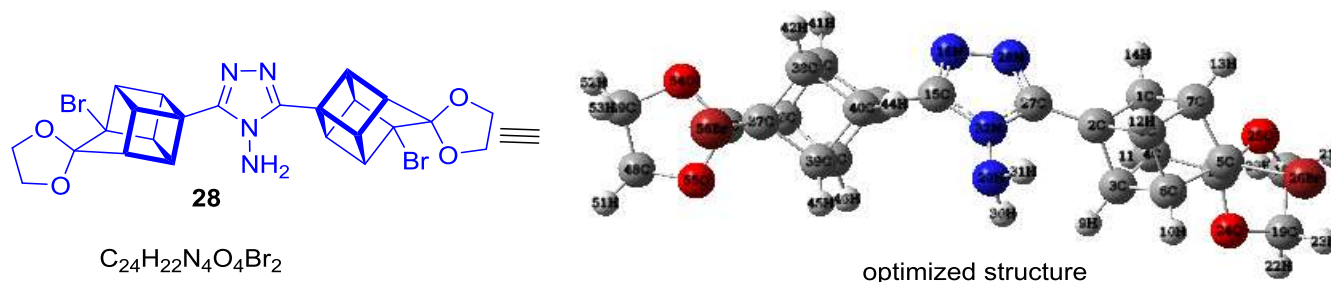

| Center Number | Atomic Symbol | Coordinates (Angstroms) |           |           |
|---------------|---------------|-------------------------|-----------|-----------|
|               |               | X                       | Y         | Z         |
| 1             | C             | 1.253435                | 0.908238  | -0.057763 |
| 2             | C             | 0.950918                | 1.304647  | 1.423179  |
| 3             | C             | -0.497590               | 1.699595  | 0.923531  |
| 4             | C             | -0.026838               | 1.639267  | -0.557770 |
| 5             | C             | -0.749206               | -0.490083 | -0.134975 |
| 6             | C             | -0.991288               | 0.229920  | 1.218898  |
| 7             | C             | 0.756370                | -0.561832 | 0.235711  |
| 8             | C             | 0.441728                | -0.158632 | 1.714843  |
| 9             | H             | -1.086107               | 2.537366  | 1.293200  |
| 10            | H             | -1.915634               | 0.076061  | 1.769018  |
| 11            | H             | 0.096577                | 2.577474  | -1.094179 |
| 12            | H             | 0.666402                | -0.767379 | 2.588642  |
| 13            | H             | 1.367968                | -1.404507 | -0.072327 |
| 14            | H             | 2.220266                | 1.058872  | -0.527039 |
| 15            | C             | 2.735993                | 3.289552  | 3.868761  |
| 16            | N             | 3.581631                | 3.311989  | 2.865195  |
| 17            | C             | -0.894337               | 0.576712  | -1.244612 |
| 18            | C             | -1.292105               | 0.546398  | -3.509235 |
| 19            | C             | -2.622313               | 0.624373  | -2.769802 |

|    |    |           |           |           |
|----|----|-----------|-----------|-----------|
| 20 | H  | -0.988129 | 1.522951  | -3.904307 |
| 21 | H  | -1.270471 | -0.195556 | -4.307560 |
| 22 | H  | -3.302394 | 1.381244  | -3.161894 |
| 23 | H  | -3.125286 | -0.346426 | -2.731895 |
| 24 | O  | -2.218047 | 1.028409  | -1.454520 |
| 25 | O  | -0.390332 | 0.122579  | -2.482236 |
| 26 | Br | -1.683753 | -2.179828 | -0.411050 |
| 27 | C  | 1.867302  | 2.128762  | 2.217140  |
| 28 | N  | 3.033869  | 2.582275  | 1.826218  |
| 29 | N  | 0.523950  | 2.319635  | 4.340362  |
| 30 | H  | -0.315704 | 2.679191  | 3.896747  |
| 31 | H  | 0.415461  | 1.321424  | 4.492992  |
| 32 | N  | 1.629906  | 2.551449  | 3.510969  |
| 33 | C  | 2.067862  | 5.152380  | 5.729331  |
| 34 | C  | 2.914646  | 3.945035  | 5.166714  |
| 35 | C  | 4.184070  | 4.782608  | 5.528883  |
| 36 | C  | 3.326907  | 6.067115  | 5.728354  |
| 37 | C  | 3.351471  | 5.111238  | 7.805298  |
| 38 | C  | 4.201617  | 4.122031  | 6.963885  |
| 39 | C  | 2.085576  | 4.486167  | 7.159485  |
| 40 | C  | 2.924895  | 3.292974  | 6.596783  |
| 41 | H  | 5.092088  | 4.785754  | 4.934033  |
| 42 | H  | 5.130526  | 3.715833  | 7.353399  |
| 43 | H  | 3.395508  | 6.847973  | 4.973890  |
| 44 | H  | 2.763785  | 2.243591  | 6.830768  |
| 45 | H  | 1.158867  | 4.398354  | 7.718863  |
| 46 | H  | 1.118355  | 5.487273  | 5.319145  |
| 47 | C  | 3.537232  | 6.512307  | 7.180249  |
| 48 | C  | 3.241861  | 8.679137  | 7.897581  |
| 49 | C  | 4.666995  | 8.238012  | 8.209374  |
| 50 | H  | 3.199633  | 9.316464  | 7.006098  |
| 51 | H  | 2.739900  | 9.176175  | 8.728116  |
| 52 | H  | 5.427894  | 8.962959  | 7.918245  |

|    |    |          |          |          |
|----|----|----------|----------|----------|
| 53 | H  | 4.788917 | 7.971733 | 9.263601 |
| 54 | O  | 4.817208 | 7.078978 | 7.380566 |
| 55 | O  | 2.576997 | 7.436510 | 7.653326 |
| 56 | Br | 3.514439 | 4.985839 | 9.747062 |

**Table S18.** Atomic coordinates for optimized structure of compound **30a** obtained using the B3LYP/6-311++G(d,p) level of theory

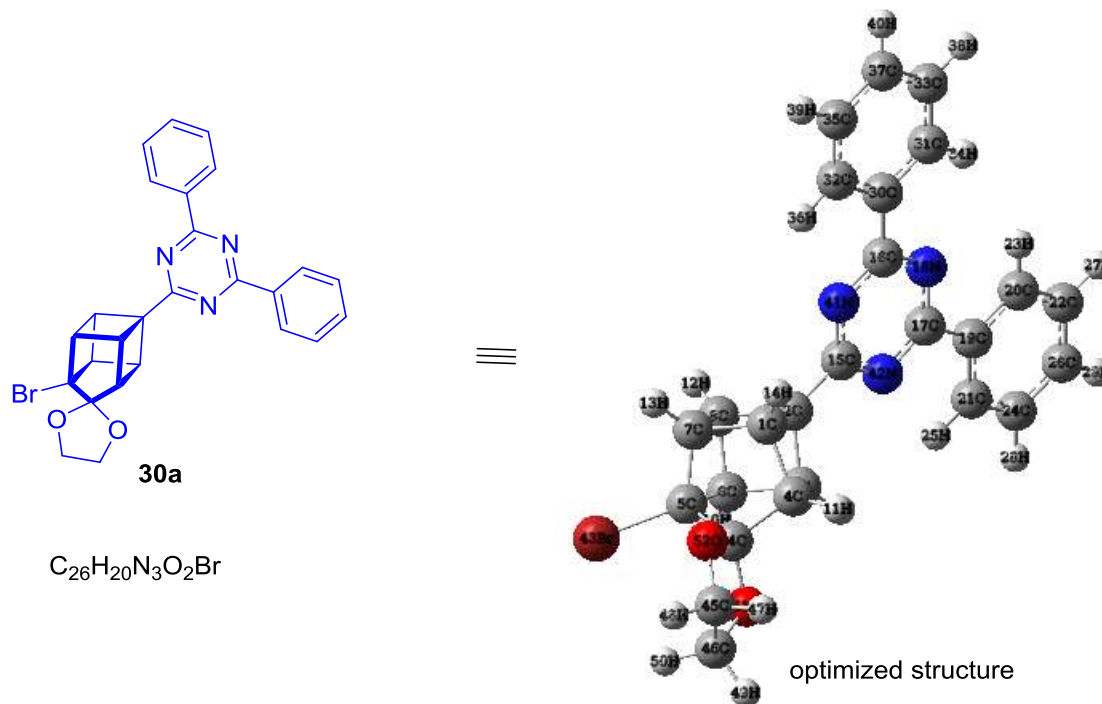

| Center | Atomic | Coordinates (Angstroms) |           |           |
|--------|--------|-------------------------|-----------|-----------|
| Number | Symbol | X                       | Y         | Z         |
| 1      | C      | -0.124376               | -0.804630 | -0.118231 |
| 2      | C      | 1.397450                | -1.080164 | -0.367157 |

|    |   |           |           |           |
|----|---|-----------|-----------|-----------|
| 3  | C | 1.581594  | 0.466270  | -0.502625 |
| 4  | C | 0.039657  | 0.660981  | -0.621492 |
| 5  | C | 0.425965  | 0.816322  | 1.625909  |
| 6  | C | 1.847153  | 0.571181  | 1.050306  |
| 7  | C | 0.145038  | -0.698690 | 1.433853  |
| 8  | C | 1.663470  | -0.975554 | 1.186923  |
| 9  | H | 2.276006  | 0.941845  | -1.189058 |
| 10 | H | 2.699359  | 1.139885  | 1.410751  |
| 11 | H | -0.369225 | 0.916567  | -1.597213 |
| 12 | H | 2.292388  | -1.643074 | 1.770802  |
| 13 | H | -0.491887 | -1.240562 | 2.126888  |
| 14 | H | -0.925631 | -1.448371 | -0.469842 |
| 15 | C | 1.962314  | -2.117872 | -1.256625 |
| 16 | C | 1.875466  | -4.212015 | -2.121077 |
| 17 | C | 3.582748  | -2.818385 | -2.678909 |
| 18 | N | 3.003712  | -4.017338 | -2.816296 |
| 19 | C | 4.837268  | -2.558102 | -3.426410 |
| 20 | C | 5.377065  | -3.536363 | -4.272965 |
| 21 | C | 5.497385  | -1.328307 | -3.294554 |
| 22 | C | 6.552786  | -3.288179 | -4.973388 |
| 23 | H | 4.864468  | -4.483873 | -4.371702 |
| 24 | C | 6.673806  | -1.084361 | -3.995449 |
| 25 | H | 5.076705  | -0.576606 | -2.639935 |
| 26 | C | 7.204381  | -2.062343 | -4.836762 |
| 27 | H | 6.962087  | -4.050732 | -5.626409 |
| 28 | H | 7.177882  | -0.130719 | -3.886206 |
| 29 | H | 8.121112  | -1.870294 | -5.383269 |
| 30 | C | 1.201541  | -5.528372 | -2.237418 |
| 31 | C | 1.727862  | -6.525878 | -3.069784 |
| 32 | C | 0.028603  | -5.789055 | -1.514998 |
| 33 | C | 1.092710  | -7.758589 | -3.177024 |
| 34 | H | 2.633198  | -6.320532 | -3.625225 |
| 35 | C | -0.603044 | -7.023472 | -1.623888 |



|    |    |           |           |           |
|----|----|-----------|-----------|-----------|
| 36 | H  | -0.373090 | -5.015472 | -0.874006 |
| 37 | C  | -0.073804 | -8.011019 | -2.454888 |
| 38 | H  | 1.507025  | -8.523712 | -3.823841 |
| 39 | H  | -1.509061 | -7.216305 | -1.060496 |
| 40 | H  | -0.567860 | -8.972664 | -2.539169 |
| 41 | N  | 1.315207  | -3.287466 | -1.327459 |
| 42 | N  | 3.095782  | -1.833770 | -1.907449 |
| 43 | Br | 0.321519  | 1.517809  | 3.445798  |
| 44 | C  | -0.376790 | 1.569516  | 0.539674  |
| 45 | C  | -2.265497 | 2.890437  | 0.562348  |
| 46 | C  | -1.034486 | 3.763011  | 0.777693  |
| 47 | H  | -2.642379 | 2.965988  | -0.464603 |
| 48 | H  | -3.075328 | 3.086048  | 1.265824  |
| 49 | H  | -1.019847 | 4.665957  | 0.166466  |
| 50 | H  | -0.898500 | 4.022458  | 1.831777  |
| 51 | O  | 0.026028  | 2.908636  | 0.331925  |
| 52 | O  | -1.764721 | 1.573546  | 0.811266  |

---

**Table S19.** Atomic coordinates for optimized structure of compound **30b** obtained using the B3LYP/6-311++G(d,p) level of theory

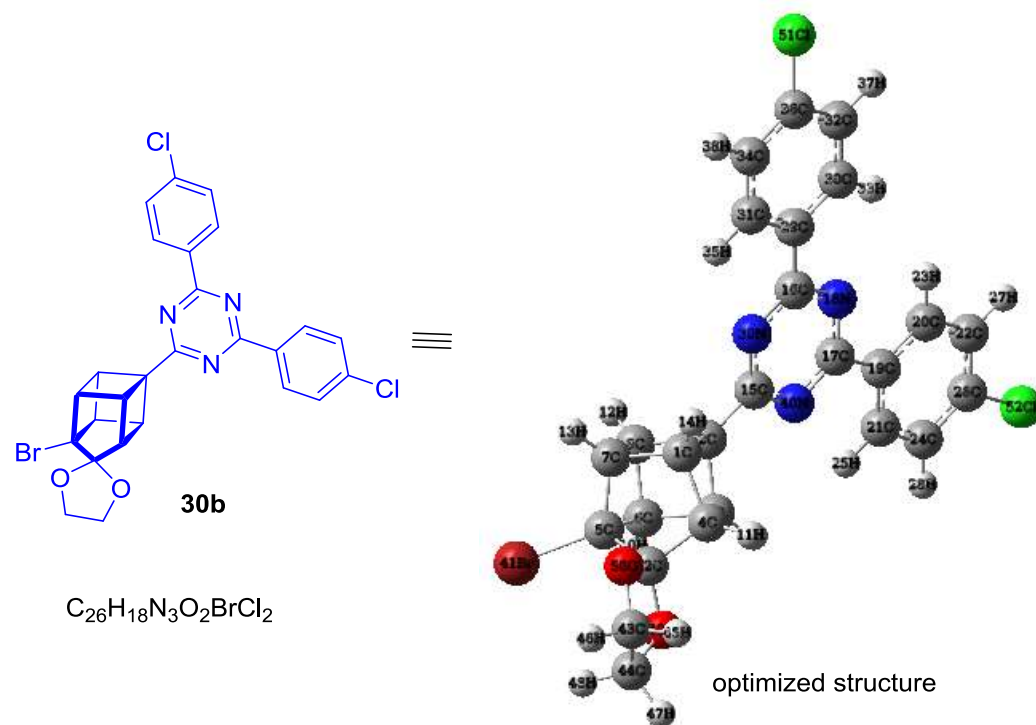

| Center | Atomic | Coordinates (Angstroms) |           |           |
|--------|--------|-------------------------|-----------|-----------|
| Number | Symbol | X                       | Y         | Z         |
| 1      | C      | -0.126270               | -0.803213 | -0.122383 |
| 2      | C      | 1.394992                | -1.079844 | -0.373964 |
| 3      | C      | 1.580684                | 0.466733  | -0.506608 |
| 4      | C      | 0.038853                | 0.662924  | -0.623318 |
| 5      | C      | 0.427984                | 0.814189  | 1.624142  |
| 6      | C      | 1.848187                | 0.568569  | 1.046137  |
| 7      | C      | 0.145094                | -0.700248 | 1.429432  |
| 8      | C      | 1.662942                | -0.977991 | 1.180727  |

|    |    |           |           |           |
|----|----|-----------|-----------|-----------|
| 9  | H  | 2.274429  | 0.943468  | -1.192953 |
| 10 | H  | 2.701525  | 1.135521  | 1.406565  |
| 11 | H  | -0.370820 | 0.920654  | -1.598113 |
| 12 | H  | 2.292045  | -1.647408 | 1.762214  |
| 13 | H  | -0.491442 | -1.242654 | 2.122353  |
| 14 | H  | -0.928950 | -1.445080 | -0.474237 |
| 15 | C  | 1.959111  | -2.117192 | -1.262647 |
| 16 | C  | 1.872559  | -4.211295 | -2.127919 |
| 17 | C  | 3.581980  | -2.821465 | -2.680709 |
| 18 | N  | 3.003130  | -4.020292 | -2.820502 |
| 19 | C  | 4.837507  | -2.562314 | -3.423840 |
| 20 | C  | 5.382465  | -3.538858 | -4.267994 |
| 21 | C  | 5.498251  | -1.333458 | -3.292619 |
| 22 | C  | 6.558946  | -3.298564 | -4.967256 |
| 23 | H  | 4.874371  | -4.488211 | -4.371048 |
| 24 | C  | 6.676034  | -1.082200 | -3.985871 |
| 25 | H  | 5.078637  | -0.578601 | -2.641077 |
| 26 | C  | 7.196346  | -2.069230 | -4.819169 |
| 27 | H  | 6.979344  | -4.052858 | -5.619858 |
| 28 | H  | 7.186949  | -0.133447 | -3.883690 |
| 29 | C  | 1.197005  | -5.524980 | -2.245339 |
| 30 | C  | 1.724639  | -6.528104 | -3.068973 |
| 31 | C  | 0.018074  | -5.782241 | -1.532641 |
| 32 | C  | 1.093306  | -7.760720 | -3.182094 |
| 33 | H  | 2.634645  | -6.332095 | -3.619925 |
| 34 | C  | -0.621778 | -7.011258 | -1.637351 |
| 35 | H  | -0.389786 | -5.008311 | -0.896094 |
| 36 | C  | -0.077218 | -7.991228 | -2.463541 |
| 37 | H  | 1.500900  | -8.535479 | -3.818630 |
| 38 | H  | -1.531990 | -7.210204 | -1.086393 |
| 39 | N  | 1.311056  | -3.286720 | -1.336309 |
| 40 | N  | 3.095140  | -1.836031 | -1.911385 |
| 41 | Br | 0.327317  | 1.510597  | 3.445377  |

|    |    |           |           |           |
|----|----|-----------|-----------|-----------|
| 42 | C  | -0.375348 | 1.570145  | 0.540006  |
| 43 | C  | -2.262309 | 2.893498  | 0.569986  |
| 44 | C  | -1.029430 | 3.763573  | 0.784590  |
| 45 | H  | -2.642221 | 2.972687  | -0.455475 |
| 46 | H  | -3.069643 | 3.087767  | 1.276616  |
| 47 | H  | -1.014765 | 4.668063  | 0.175775  |
| 48 | H  | -0.889967 | 4.019810  | 1.838925  |
| 49 | O  | 0.028806  | 2.908497  | 0.333537  |
| 50 | O  | -1.762608 | 1.574618  | 0.812832  |
| 51 | Cl | -0.880758 | -9.545810 | -2.601883 |
| 52 | Cl | 8.683158  | -1.758326 | -5.699143 |

**Table S20.** Atomic coordinates for optimized structure of compound **30c** obtained using the B3LYP/6-311++G(d,p) level of theory

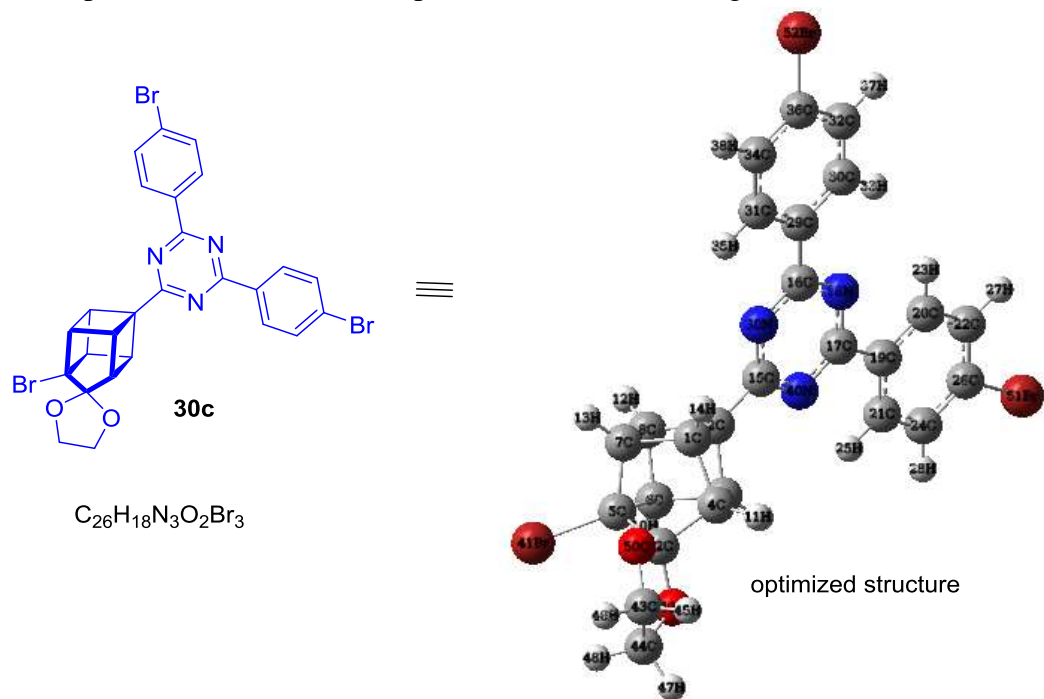

| Center | Atomic | Coordinates (Angstroms) |           |           |
|--------|--------|-------------------------|-----------|-----------|
| Number | Symbol | X                       | Y         | Z         |
| 1      | C      | -0.128117               | -0.800761 | -0.127029 |
| 2      | C      | 1.393566                | -1.081039 | -0.372970 |
| 3      | C      | 1.584128                | 0.465221  | -0.500962 |
| 4      | C      | 0.043355                | 0.666144  | -0.623649 |
| 5      | C      | 0.423400                | 0.810639  | 1.625872  |
| 6      | C      | 1.845331                | 0.562336  | 1.053238  |
| 7      | C      | 0.136986                | -0.702459 | 1.426124  |
| 8      | C      | 1.654990                | -0.984012 | 1.183125  |
| 9      | H      | 2.282110                | 0.941739  | -1.183131 |
| 10     | H      | 2.698828                | 1.125779  | 1.418741  |
| 11     | H      | -0.361474               | 0.927366  | -1.599531 |
| 12     | H      | 2.279624                | -1.656761 | 1.765580  |
| 13     | H      | -0.503975               | -1.244849 | 2.114958  |
| 14     | H      | -0.931043               | -1.439543 | -0.483912 |
| 15     | C      | 1.958103                | -2.117864 | -1.261877 |
| 16     | C      | 1.872369                | -4.212115 | -2.126904 |
| 17     | C      | 3.580511                | -2.821487 | -2.680800 |
| 18     | N      | 3.002482                | -4.020664 | -2.820116 |
| 19     | C      | 4.835566                | -2.561524 | -3.425009 |
| 20     | C      | 5.383201                | -3.539630 | -4.265327 |
| 21     | C      | 5.492455                | -1.330300 | -3.298667 |
| 22     | C      | 6.559157                | -3.298573 | -4.966469 |
| 23     | H      | 4.878321                | -4.491187 | -4.364619 |
| 24     | C      | 6.669522                | -1.077491 | -3.993825 |
| 25     | H      | 5.071032                | -0.574044 | -2.649795 |
| 26     | C      | 7.192378                | -2.066267 | -4.823698 |
| 27     | H      | 6.977936                | -4.057184 | -5.614824 |
| 28     | H      | 7.173623                | -0.125199 | -3.892620 |
| 29     | C      | 1.197366                | -5.526429 | -2.244121 |

|    |    |           |           |           |
|----|----|-----------|-----------|-----------|
| 30 | C  | 1.723407  | -6.527755 | -3.070655 |
| 31 | C  | 0.020953  | -5.785588 | -1.528315 |
| 32 | C  | 1.092862  | -7.761482 | -3.183735 |
| 33 | H  | 2.631528  | -6.330429 | -3.624393 |
| 34 | C  | -0.618436 | -7.015642 | -1.632275 |
| 35 | H  | -0.386072 | -5.012961 | -0.889515 |
| 36 | C  | -0.075164 | -7.993998 | -2.461486 |
| 37 | H  | 1.502862  | -8.531765 | -3.823873 |
| 38 | H  | -1.526345 | -7.211541 | -1.076762 |
| 39 | N  | 1.310818  | -3.287973 | -1.335111 |
| 40 | N  | 3.093537  | -1.836204 | -1.911477 |
| 41 | Br | 0.316885  | 1.502701  | 3.448359  |
| 42 | C  | -0.373041 | 1.571705  | 0.540178  |
| 43 | C  | -2.255997 | 2.900708  | 0.564072  |
| 44 | C  | -1.021581 | 3.766639  | 0.786413  |
| 45 | H  | -2.630540 | 2.982894  | -0.463125 |
| 46 | H  | -3.066254 | 3.096061  | 1.267033  |
| 47 | H  | -1.001263 | 4.672298  | 0.179508  |
| 48 | H  | -0.886514 | 4.020283  | 1.841939  |
| 49 | O  | 0.036268  | 2.909291  | 0.338792  |
| 50 | O  | -1.761382 | 1.579922  | 0.807053  |
| 51 | Br | 8.811301  | -1.725104 | -5.787065 |
| 52 | Br | -0.949568 | -9.690646 | -2.611229 |

---

**Table S21.** Atomic coordinates for optimized structure of compound **31** obtained using the B3LYP/6-311++G(d,p) level of theory

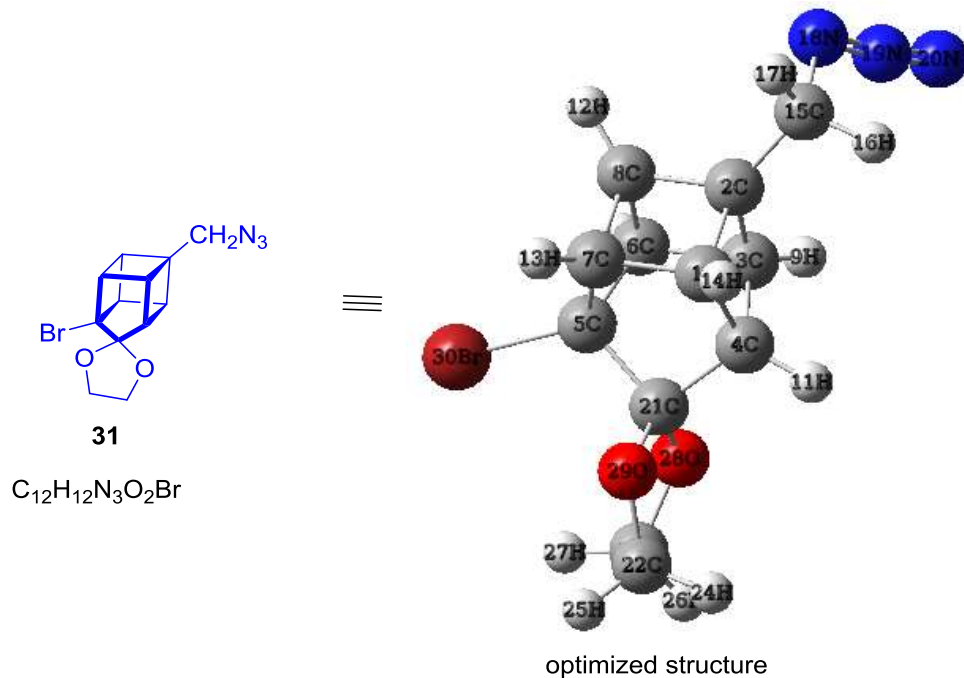

| Center | Atomic | Coordinates (Angstroms) |           |           |
|--------|--------|-------------------------|-----------|-----------|
| Number | Symbol | X                       | Y         | Z         |
| 1      | C      | -0.035946               | -0.543110 | 0.059401  |
| 2      | C      | 1.489881                | -0.902694 | 0.179216  |
| 3      | C      | 1.769779                | 0.640363  | 0.059894  |
| 4      | C      | 0.307356                | 0.902813  | -0.406280 |
| 5      | C      | 0.185360                | 1.079734  | 1.870051  |
| 6      | C      | 1.684950                | 0.759350  | 1.632581  |
| 7      | C      | -0.118146               | -0.423625 | 1.632594  |
| 8      | C      | 1.404806                | -0.778011 | 1.736027  |
| 9      | H      | 2.617397                | 1.092857  | -0.450090 |
| 10     | H      | 2.461079                | 1.297737  | 2.168613  |

|    |    |           |           |           |
|----|----|-----------|-----------|-----------|
| 11 | H  | 0.137725  | 1.162918  | -1.449375 |
| 12 | H  | 1.851296  | -1.448923 | 2.465983  |
| 13 | H  | -0.924692 | -0.919125 | 2.165550  |
| 14 | H  | -0.780129 | -1.145072 | -0.458672 |
| 15 | C  | 2.156518  | -1.997236 | -0.604321 |
| 16 | H  | 2.015087  | -1.845327 | -1.682143 |
| 17 | H  | 1.717853  | -2.963304 | -0.343721 |
| 18 | N  | 3.603994  | -2.127525 | -0.288078 |
| 19 | N  | 4.370703  | -1.424346 | -0.941347 |
| 20 | N  | 5.179439  | -0.841336 | -1.485959 |
| 21 | C  | -0.317354 | 1.849368  | 0.625976  |
| 22 | C  | -2.103925 | 3.253292  | 0.230042  |
| 23 | C  | -0.909986 | 4.071044  | 0.708762  |
| 24 | H  | -2.248066 | 3.339019  | -0.853468 |
| 25 | H  | -3.036094 | 3.489890  | 0.743927  |
| 26 | H  | -0.720528 | 4.966418  | 0.116142  |
| 27 | H  | -0.994610 | 4.333576  | 1.767253  |
| 28 | O  | 0.181561  | 3.165025  | 0.503960  |
| 29 | O  | -1.729185 | 1.915909  | 0.575360  |
| 30 | Br | -0.291602 | 1.813583  | 3.615708  |

---



**Table S22.** Atomic coordinates for optimized structure of compound **32** obtained using the B3LYP/6-311++G(d,p) level of theory

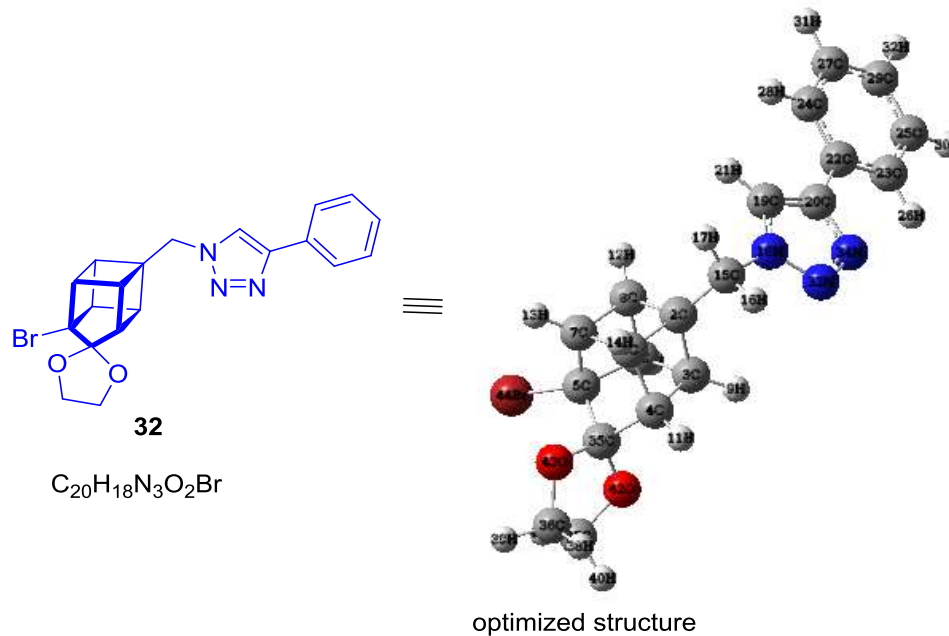

| Center Number | Atomic Symbol | Coordinates (Angstroms) |           |           |
|---------------|---------------|-------------------------|-----------|-----------|
|               |               | X                       | Y         | Z         |
| 1             | C             | -0.083906               | -0.542973 | -0.140157 |
| 2             | C             | 1.414686                | -0.996602 | -0.015833 |
| 3             | C             | 1.784350                | 0.527959  | -0.004985 |
| 4             | C             | 0.351704                | 0.912639  | -0.481421 |
| 5             | C             | 0.179831                | 0.917361  | 1.799419  |
| 6             | C             | 1.664688                | 0.530550  | 1.569847  |
| 7             | C             | -0.201245               | -0.542102 | 1.435072  |
| 8             | C             | 1.295988                | -0.991646 | 1.546543  |
| 9             | H             | 2.674996                | 0.948537  | -0.463964 |
| 10            | H             | 2.456056                | 0.978984  | 2.163085  |

|    |   |           |           |           |
|----|---|-----------|-----------|-----------|
| 11 | H | 0.225784  | 1.264514  | -1.503413 |
| 12 | H | 1.677890  | -1.737310 | 2.241017  |
| 13 | H | -1.048145 | -1.030676 | 1.908561  |
| 14 | H | -0.846186 | -1.060600 | -0.719732 |
| 15 | C | 2.042115  | -2.042422 | -0.898032 |
| 16 | H | 1.938102  | -1.767467 | -1.950494 |
| 17 | H | 1.561692  | -3.014779 | -0.754063 |
| 18 | N | 3.474620  | -2.211924 | -0.655163 |
| 19 | C | 4.104921  | -3.018064 | 0.233010  |
| 20 | C | 5.449265  | -2.728572 | 0.082034  |
| 21 | H | 3.569865  | -3.701645 | 0.869151  |
| 22 | C | 6.624403  | -3.285384 | 0.763418  |
| 23 | C | 7.887253  | -2.706782 | 0.571267  |
| 24 | C | 6.516135  | -4.395125 | 1.613671  |
| 25 | C | 9.006416  | -3.223649 | 1.216540  |
| 26 | H | 7.976165  | -1.851758 | -0.086993 |
| 27 | C | 7.636960  | -4.908730 | 2.259162  |
| 28 | H | 5.552822  | -4.869110 | 1.768192  |
| 29 | C | 8.887909  | -4.324650 | 2.064179  |
| 30 | H | 9.975489  | -2.763697 | 1.057632  |
| 31 | H | 7.533893  | -5.768471 | 2.911888  |
| 32 | H | 9.761379  | -4.725311 | 2.565965  |
| 33 | N | 4.369274  | -1.453433 | -1.321044 |
| 34 | N | 5.552599  | -1.762043 | -0.880994 |
| 35 | C | -0.244992 | 1.810134  | 0.609827  |
| 36 | C | -1.933881 | 3.344904  | 0.280836  |
| 37 | C | -0.709803 | 4.050256  | 0.852401  |
| 38 | H | -2.037602 | 3.518943  | -0.796644 |
| 39 | H | -2.866556 | 3.598760  | 0.785366  |
| 40 | H | -0.450652 | 4.975501  | 0.337123  |
| 41 | H | -0.811096 | 4.234989  | 1.925811  |
| 42 | O | 0.332847  | 3.098379  | 0.604965  |
| 43 | O | -1.648762 | 1.965271  | 0.534570  |

**Table S23.** Atomic coordinates for optimized structure of compound **33** obtained using the B3LYP/6-311++G(d,p) level of theory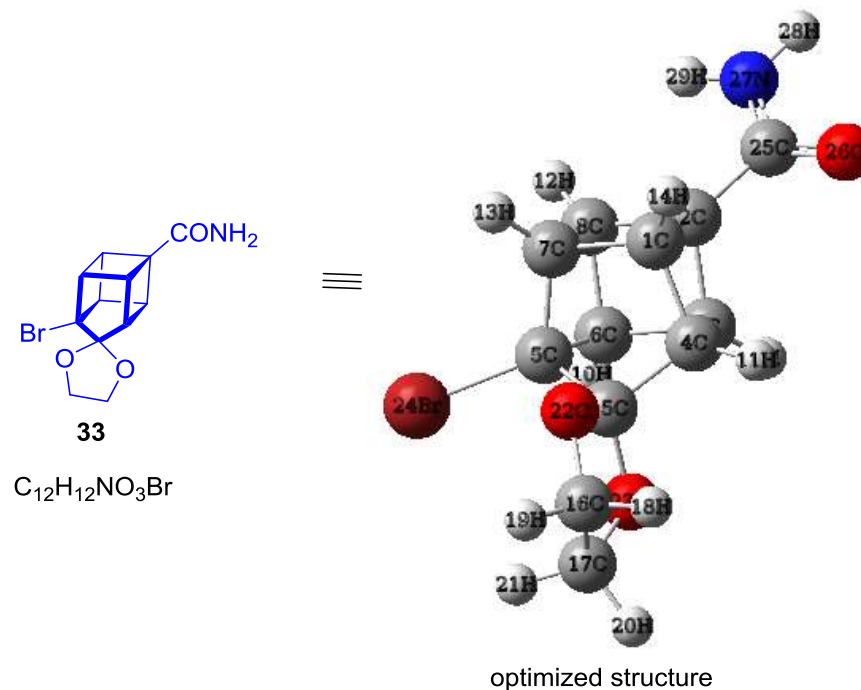

| Center | Atomic | Coordinates (Angstroms) |           |           |
|--------|--------|-------------------------|-----------|-----------|
| Number | Symbol | X                       | Y         | Z         |
| 1      | C      | 0.037599                | -0.599707 | -0.025878 |
| 2      | C      | 1.574803                | -0.929972 | -0.023441 |
| 3      | C      | 1.801044                | 0.621603  | -0.162726 |
| 4      | C      | 0.303651                | 0.852635  | -0.513332 |
| 5      | C      | 0.359612                | 1.025071  | 1.767484  |
| 6      | C      | 1.842605                | 0.740661  | 1.410560  |

|    |    |           |           |           |
|----|----|-----------|-----------|-----------|
| 7  | C  | 0.075041  | -0.484828 | 1.548423  |
| 8  | C  | 1.609115  | -0.803416 | 1.537352  |
| 9  | H  | 2.600210  | 1.065984  | -0.750007 |
| 10 | H  | 2.645486  | 1.299443  | 1.882819  |
| 11 | H  | 0.053746  | 1.100635  | -1.541889 |
| 12 | H  | 2.113622  | -1.451610 | 2.252696  |
| 13 | H  | -0.673852 | -1.003529 | 2.140103  |
| 14 | H  | -0.714071 | -1.229259 | -0.494509 |
| 15 | C  | -0.256076 | 1.784025  | 0.569182  |
| 16 | C  | -2.090862 | 3.139248  | 0.265252  |
| 17 | C  | -0.892819 | 3.996830  | 0.655305  |
| 18 | H  | -2.290628 | 3.185263  | -0.811825 |
| 19 | H  | -3.001419 | 3.371582  | 0.818005  |
| 20 | H  | -0.758197 | 4.879406  | 0.029256  |
| 21 | H  | -0.926272 | 4.287744  | 1.709539  |
| 22 | O  | -1.666778 | 1.824069  | 0.636688  |
| 23 | O  | 0.208117  | 3.110673  | 0.416434  |
| 24 | Br | 0.005576  | 1.745515  | 3.546428  |
| 25 | C  | 2.193199  | -1.923138 | -0.955717 |
| 26 | O  | 2.017228  | -1.862047 | -2.163255 |
| 27 | N  | 2.963467  | -2.889986 | -0.373929 |
| 28 | H  | 3.405327  | -3.577416 | -0.964830 |
| 29 | H  | 3.103873  | -2.934553 | 0.620810  |

---

**Table S24.** Atomic coordinates for optimized structure of biradical **8A** using the B3LYP/6-311++G(d,p) level of theory

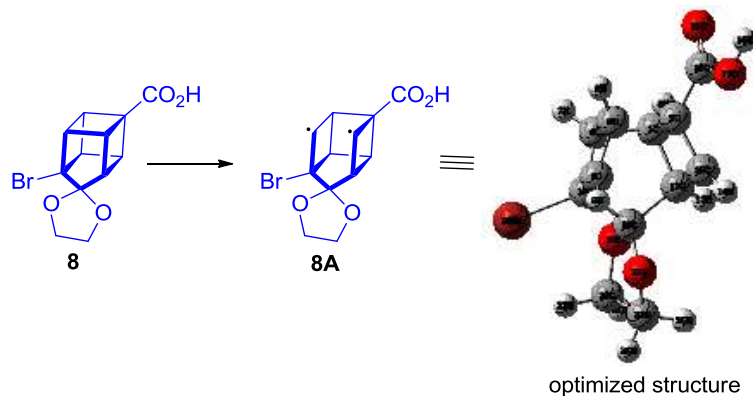

| Center Number | Atomic Symbol | Coordinates (Angstroms) |           |           |
|---------------|---------------|-------------------------|-----------|-----------|
|               |               | X                       | Y         | Z         |
| 1             | C             | 0.845330                | 2.226347  | 0.782196  |
| 2             | C             | 0.428337                | 1.846581  | -0.675854 |
| 3             | C             | -0.947172               | 2.745015  | -0.455215 |
| 4             | C             | -0.440810               | 3.061946  | 0.992377  |
| 5             | H             | 1.137222                | 1.476252  | 1.511583  |
| 6             | H             | -1.867989               | 2.213421  | -0.697948 |
| 7             | H             | -1.053583               | 2.935443  | 1.879025  |
| 8             | C             | -0.760505               | 4.176778  | -0.796617 |
| 9             | H             | -0.885317               | 4.760887  | -1.698913 |
| 10            | C             | -0.110772               | 4.503800  | 0.497050  |
| 11            | C             | 1.923359                | 3.189003  | 0.173546  |
| 12            | H             | 2.958191                | 3.084273  | 0.509951  |
| 13            | C             | 1.586802                | 2.632951  | -1.183939 |
| 14            | H             | 1.916772                | 2.886299  | -2.183026 |
| 15            | C             | 0.135080                | 0.453115  | -1.127950 |
| 16            | O             | -0.148581               | -0.470266 | -0.404240 |
| 17            | O             | 0.180153                | 0.340102  | -2.478959 |

|    |    |           |           |           |
|----|----|-----------|-----------|-----------|
| 18 | H  | -0.049578 | -0.575931 | -2.698101 |
| 19 | C  | 1.443502  | 4.644816  | 0.476153  |
| 20 | C  | 2.525003  | 6.342897  | 1.610541  |
| 21 | C  | 2.868861  | 6.420375  | 0.127962  |
| 22 | H  | 1.777151  | 7.086859  | 1.896554  |
| 23 | H  | 3.391794  | 6.409053  | 2.268874  |
| 24 | H  | 2.788274  | 7.422446  | -0.293538 |
| 25 | H  | 3.862825  | 6.009479  | -0.084152 |
| 26 | O  | 1.977961  | 5.022764  | 1.729872  |
| 27 | O  | 1.857649  | 5.602790  | -0.472134 |
| 28 | Br | -1.005198 | 6.030364  | 1.452938  |

**Table S25.** Atomic coordinates for optimized structure of biradical **8B** obtained using the B3LYP/6-311++G(d,p) level of theory

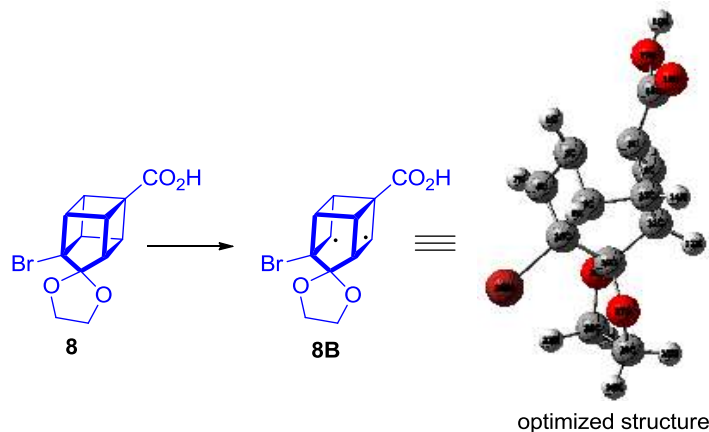

| Center Number | Atomic Symbol | Coordinates (Angstroms) |          |           |
|---------------|---------------|-------------------------|----------|-----------|
|               |               | X                       | Y        | Z         |
| 1             | C             | 1.656149                | 2.103893 | 0.250053  |
| 2             | C             | 0.506677                | 1.811052 | -0.651766 |
| 3             | C             | -0.897872               | 2.575565 | -0.217920 |

|    |    |           |           |           |
|----|----|-----------|-----------|-----------|
| 4  | C  | -0.736564 | 3.424901  | 0.987636  |
| 5  | H  | 2.007752  | 1.640456  | 1.162562  |
| 6  | H  | -1.797953 | 1.982832  | -0.385113 |
| 7  | H  | -0.846791 | 3.255666  | 2.050728  |
| 8  | C  | -0.439669 | 3.793080  | -1.090965 |
| 9  | H  | -1.070609 | 4.263032  | -1.838537 |
| 10 | C  | -0.134390 | 4.554165  | 0.236377  |
| 11 | C  | 1.942190  | 3.432661  | -0.395992 |
| 12 | H  | 2.972127  | 3.616503  | -0.714222 |
| 13 | C  | 0.875734  | 3.078084  | -1.488866 |
| 14 | H  | 1.169448  | 3.012216  | -2.532521 |
| 15 | C  | 0.267375  | 0.458400  | -1.239713 |
| 16 | O  | 0.020162  | 0.234401  | -2.399615 |
| 17 | O  | 0.317654  | -0.516738 | -0.297999 |
| 18 | H  | 0.125576  | -1.356201 | -0.743293 |
| 19 | C  | 1.416536  | 4.705696  | 0.336451  |
| 20 | C  | 2.373981  | 6.124816  | 1.881410  |
| 21 | C  | 2.759887  | 6.578753  | 0.477840  |
| 22 | H  | 1.577696  | 6.741266  | 2.307408  |
| 23 | H  | 3.215128  | 6.072738  | 2.573340  |
| 24 | H  | 2.613294  | 7.645234  | 0.304491  |
| 25 | H  | 3.791094  | 6.302607  | 0.228289  |
| 26 | O  | 1.902632  | 4.788574  | 1.656883  |
| 27 | O  | 1.842793  | 5.861983  | -0.354713 |
| 28 | Br | -1.095279 | 6.292223  | 0.555802  |

---

**Table S26.** Atomic coordinates for optimized structure of biradical **13A** using the B3LYP/6-311++G(d,p) level of theory

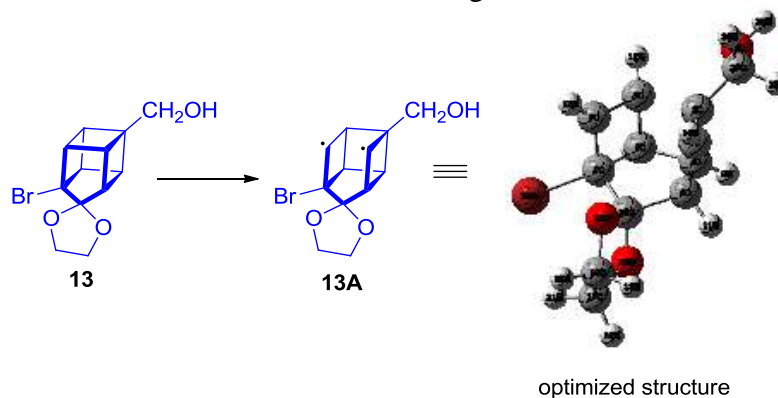

| Center Number | Atomic Symbol | Coordinates (Angstroms) |           |           |
|---------------|---------------|-------------------------|-----------|-----------|
|               |               | X                       | Y         | Z         |
| 1             | C             | 0.104835                | -0.413390 | -1.015209 |
| 2             | C             | 1.293532                | -1.076945 | -0.399876 |
| 3             | C             | 1.935881                | 0.348682  | -0.223793 |
| 4             | C             | 0.580594                | 0.977589  | -0.693263 |
| 5             | C             | 0.473280                | 0.795287  | 1.739306  |
| 6             | C             | 1.864843                | 0.231848  | 1.317652  |
| 7             | C             | -0.036831               | -0.594833 | 1.809579  |
| 8             | C             | 1.199255                | -1.184925 | 1.229857  |
| 9             | H             | 2.863255                | 0.644649  | -0.708133 |
| 10            | H             | 2.730578                | 0.445247  | 1.936428  |
| 11            | H             | 0.598719                | 1.698513  | -1.515252 |
| 12            | H             | 1.639967                | -2.098012 | 1.630337  |
| 13            | H             | -1.024144               | -0.974483 | 2.039671  |
| 14            | H             | -0.866522               | -0.787774 | -1.319769 |
| 15            | C             | -0.051072               | 1.667133  | 0.558969  |
| 16            | C             | -1.858336               | 3.073019  | 0.298640  |
| 17            | C             | -0.683791               | 3.872420  | 0.850433  |



|    |    |           |           |           |
|----|----|-----------|-----------|-----------|
| 18 | H  | -1.997678 | 3.239174  | -0.776318 |
| 19 | H  | -2.798480 | 3.251027  | 0.821360  |
| 20 | H  | -0.501066 | 4.808913  | 0.321946  |
| 21 | H  | -0.785155 | 4.059862  | 1.922638  |
| 22 | O  | -1.461948 | 1.720215  | 0.544126  |
| 23 | O  | 0.425618  | 3.000089  | 0.603153  |
| 24 | Br | 0.367240  | 1.766321  | 3.505993  |
| 25 | H  | 3.589637  | -3.302326 | -0.859795 |
| 26 | O  | 3.162480  | -2.569216 | -0.407436 |
| 27 | C  | 1.946374  | -2.249258 | -1.088379 |
| 28 | H  | 1.256609  | -3.106570 | -1.076386 |
| 29 | H  | 2.145828  | -1.987614 | -2.136167 |

**Table S27.** Atomic coordinates for optimized structure of biradical **13B** obtained using the B3LYP/6-311++G(d,p) level of theory

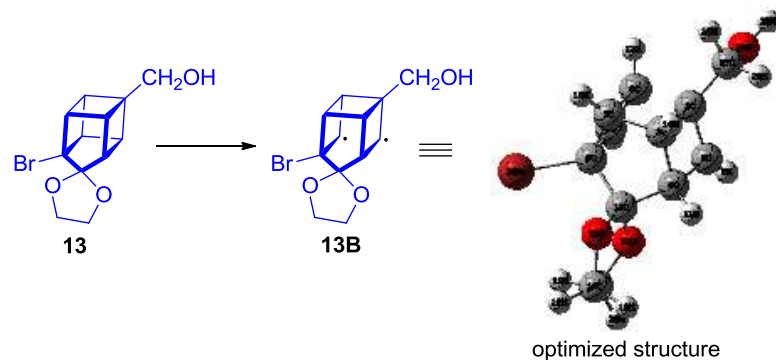

| Center Number | Atomic Symbol | Coordinates (Angstroms) |           |           |
|---------------|---------------|-------------------------|-----------|-----------|
|               |               | X                       | Y         | Z         |
| 1             | C             | -0.084959               | -0.736298 | -0.327203 |
| 2             | C             | 1.461483                | -1.019621 | -0.337549 |
| 3             | C             | 1.663407                | 0.346641  | -0.909076 |
| 4             | C             | 0.222863                | 0.745389  | -0.732540 |

|    |    |           |           |           |
|----|----|-----------|-----------|-----------|
| 5  | C  | 0.152719  | 0.670387  | 1.707710  |
| 6  | C  | 1.570358  | 0.297474  | 1.923897  |
| 7  | C  | -0.125167 | -0.784919 | 1.221134  |
| 8  | C  | 1.422816  | -1.040841 | 1.294846  |
| 9  | H  | 2.553436  | 0.925986  | -1.121513 |
| 10 | H  | 2.417078  | 0.887648  | 2.249596  |
| 11 | H  | -0.287221 | 1.163676  | -1.605191 |
| 12 | H  | 1.899920  | -1.918886 | 1.733160  |
| 13 | H  | -0.862593 | -1.382374 | 1.748571  |
| 14 | H  | -0.799705 | -1.310312 | -0.913883 |
| 15 | C  | -0.132042 | 1.624087  | 0.506247  |
| 16 | C  | -1.604623 | 3.391930  | 0.285422  |
| 17 | C  | -0.276728 | 3.899382  | 0.835363  |
| 18 | H  | -1.724325 | 3.632324  | -0.777780 |
| 19 | H  | -2.474516 | 3.743222  | 0.841566  |
| 20 | H  | 0.094666  | 4.794668  | 0.335802  |
| 21 | H  | -0.320299 | 4.063046  | 1.915722  |
| 22 | O  | -1.502675 | 1.976434  | 0.462527  |
| 23 | O  | 0.615649  | 2.819612  | 0.529706  |
| 24 | Br | -0.765424 | 1.274685  | 3.403562  |
| 25 | H  | 3.904716  | -2.966003 | -1.123918 |
| 26 | O  | 3.489582  | -2.209524 | -0.698955 |
| 27 | C  | 2.084551  | -2.243135 | -0.961715 |
| 28 | H  | 1.630969  | -3.148662 | -0.532568 |
| 29 | H  | 1.889568  | -2.241373 | -2.042628 |

---

**Table S28.** Atomic coordinates for optimized structure of biradical **14A** using the B3LYP/6-311++G(d,p) level of theory

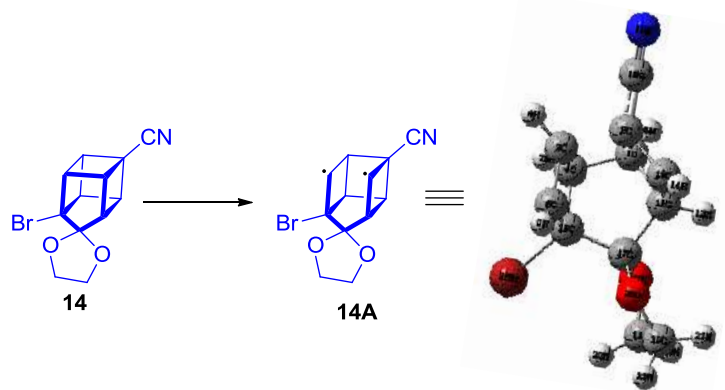

optimized structure

| Center Number | Atomic Symbol | Coordinates (Angstroms) |          |           |
|---------------|---------------|-------------------------|----------|-----------|
|               |               | X                       | Y        | Z         |
| 1             | C             | 0.850319                | 2.327939 | 0.851302  |
| 2             | C             | 0.285328                | 1.822945 | -0.539031 |
| 3             | C             | -1.051973               | 2.746051 | -0.256720 |
| 4             | C             | -0.415813               | 3.179941 | 1.106898  |
| 5             | H             | 1.217528                | 1.639463 | 1.606892  |
| 6             | H             | -1.987125               | 2.197360 | -0.369857 |
| 7             | H             | -0.941973               | 3.127779 | 2.054529  |
| 8             | C             | -0.905814               | 4.146233 | -0.728328 |
| 9             | H             | -1.126865               | 4.658232 | -1.655454 |
| 10            | C             | -0.139404               | 4.576450 | 0.468022  |
| 11            | C             | 1.859831                | 3.228251 | 0.065353  |
| 12            | H             | 2.921618                | 3.146364 | 0.310940  |
| 13            | C             | 1.406985                | 2.559516 | -1.200335 |
| 14            | H             | 1.667526                | 2.694344 | -2.241996 |
| 15            | C             | 0.009004                | 0.445880 | -0.860287 |

|    |    |           |           |           |
|----|----|-----------|-----------|-----------|
| 16 | N  | -0.233411 | -0.656088 | -1.110339 |
| 17 | C  | 1.405921  | 4.708337  | 0.291404  |
| 18 | C  | 2.591075  | 6.482082  | 1.179625  |
| 19 | C  | 2.793279  | 6.437614  | -0.330240 |
| 20 | H  | 1.875890  | 7.253269  | 1.476227  |
| 21 | H  | 3.516640  | 6.590273  | 1.745635  |
| 22 | H  | 2.672420  | 7.402522  | -0.822381 |
| 23 | H  | 3.762349  | 6.003412  | -0.601492 |
| 24 | O  | 2.053753  | 5.180348  | 1.455334  |
| 25 | O  | 1.729545  | 5.580768  | -0.765239 |
| 26 | Br | -0.944168 | 6.175032  | 1.376428  |

**Table S29.** Atomic coordinates for optimized structure of biradical **14B** obtained using the B3LYP/6-311++G(d,p) level of theory

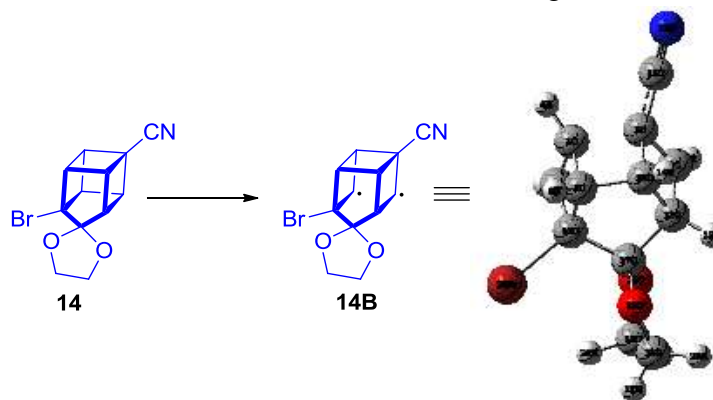

| optimized structure |        |                         |          |           |
|---------------------|--------|-------------------------|----------|-----------|
| Center              | Atomic | Coordinates (Angstroms) |          |           |
| Number              | Symbol | X                       | Y        | Z         |
| 1                   | C      | 1.591821                | 2.203983 | 0.742451  |
| 2                   | C      | 0.536531                | 1.680680 | -0.179923 |
| 3                   | C      | -0.892122               | 2.500189 | -0.106346 |

|    |    |           |           |           |
|----|----|-----------|-----------|-----------|
| 4  | C  | -0.876334 | 3.608450  | 0.880867  |
| 5  | H  | 1.865549  | 1.937172  | 1.754714  |
| 6  | H  | -1.765146 | 1.860622  | -0.237147 |
| 7  | H  | -1.126832 | 3.687595  | 1.930484  |
| 8  | C  | -0.331219 | 3.497268  | -1.175749 |
| 9  | H  | -0.867152 | 3.768629  | -2.079570 |
| 10 | C  | -0.183400 | 4.550771  | -0.033169 |
| 11 | C  | 1.949399  | 3.359785  | -0.147013 |
| 12 | H  | 3.009985  | 3.490550  | -0.377700 |
| 13 | C  | 1.020476  | 2.745817  | -1.246115 |
| 14 | H  | 1.441373  | 2.450043  | -2.202757 |
| 15 | C  | 0.406886  | 0.268594  | -0.435476 |
| 16 | N  | 0.281580  | -0.860565 | -0.647413 |
| 17 | C  | 1.346261  | 4.754609  | 0.212195  |
| 18 | C  | 2.101452  | 6.508889  | 1.499449  |
| 19 | C  | 2.658191  | 6.652134  | 0.087270  |
| 20 | H  | 1.251794  | 7.174177  | 1.673931  |
| 21 | H  | 2.847868  | 6.641938  | 2.282744  |
| 22 | H  | 2.524344  | 7.646497  | -0.339345 |
| 23 | H  | 3.714674  | 6.365731  | 0.032134  |
| 24 | O  | 1.672250  | 5.138909  | 1.526192  |
| 25 | O  | 1.860004  | 5.732117  | -0.666929 |
| 26 | Br | -1.165765 | 6.289734  | -0.240889 |

---

**Table S30.** Atomic coordinates for optimized structure of biradical **15A** obtained using the B3LYP/6-311++G(d,p) level of theory

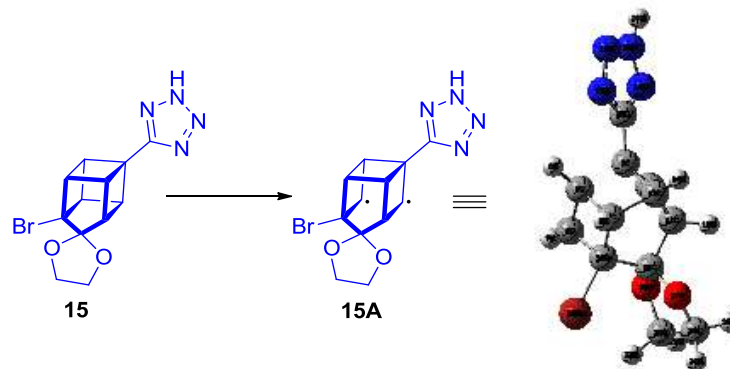

optimized structure

| Center | Atomic | Coordinates (Angstroms) |           |           |
|--------|--------|-------------------------|-----------|-----------|
| Number | Symbol | X                       | Y         | Z         |
| 1      | C      | 1.184597                | 1.204605  | -0.392715 |
| 2      | C      | 0.294528                | 0.793778  | -1.516124 |
| 3      | C      | -0.703727               | 1.986210  | -2.050519 |
| 4      | C      | -0.552859               | 3.258846  | -1.299152 |
| 5      | H      | 1.078657                | 1.144924  | 0.682715  |
| 6      | H      | -1.677398               | 1.619073  | -2.374430 |
| 7      | H      | -1.011431               | 3.671141  | -0.409640 |
| 8      | C      | 0.431180                | 2.467792  | -3.014449 |
| 9      | H      | 0.280478                | 2.642784  | -4.074806 |
| 10     | C      | 0.643874                | 3.687249  | -2.064198 |
| 11     | C      | 2.154101                | 1.935591  | -1.277516 |
| 12     | H      | 3.212288                | 1.685864  | -1.159042 |
| 13     | C      | 1.388202                | 1.360169  | -2.514181 |
| 14     | H      | 1.911601                | 0.721966  | -3.221325 |
| 15     | C      | -0.280792               | -0.564845 | -1.575308 |
| 16     | N      | -0.065963               | -1.517432 | -0.669823 |

|    |    |           |           |           |
|----|----|-----------|-----------|-----------|
| 17 | N  | -1.095921 | -1.001011 | -2.579353 |
| 18 | N  | -1.396519 | -2.241073 | -2.310719 |
| 19 | C  | 2.023064  | 3.488279  | -1.359809 |
| 20 | C  | 2.992270  | 5.217165  | -0.186327 |
| 21 | C  | 3.912436  | 4.819969  | -1.335270 |
| 22 | H  | 2.421413  | 6.121095  | -0.414753 |
| 23 | H  | 3.504617  | 5.329879  | 0.769527  |
| 24 | H  | 4.259816  | 5.664300  | -1.931668 |
| 25 | H  | 4.772097  | 4.235474  | -0.987000 |
| 26 | O  | 2.114971  | 4.086525  | -0.087009 |
| 27 | O  | 3.067495  | 4.009677  | -2.157931 |
| 28 | Br | 0.443372  | 5.529416  | -2.855086 |
| 29 | N  | -0.774250 | -2.519962 | -1.174547 |
| 30 | H  | -0.842911 | -3.424311 | -0.728862 |

**Table S31.** Atomic coordinates for optimized structure of biradical **15B** obtained using the B3LYP/6-311++G(d,p) level of theory

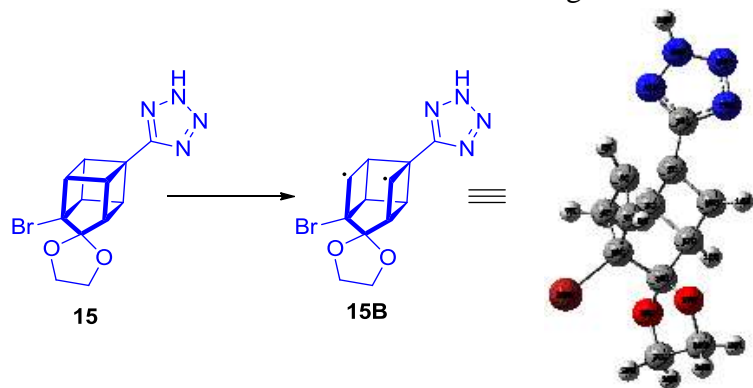

optimized structure

| Center | Atomic | Coordinates (Angstroms) |   |   |
|--------|--------|-------------------------|---|---|
| Number | Symbol | X                       | Y | Z |

|    |    |           |           |           |
|----|----|-----------|-----------|-----------|
| 1  | C  | 0.596098  | 1.802535  | -0.318005 |
| 2  | C  | 0.805263  | 0.612311  | -1.350299 |
| 3  | C  | -0.355854 | 1.302429  | -2.273861 |
| 4  | C  | -0.507355 | 2.431964  | -1.199488 |
| 5  | H  | 0.427441  | 1.625742  | 0.741149  |
| 6  | H  | -1.147232 | 0.610879  | -2.562823 |
| 7  | H  | -1.460518 | 2.733668  | -0.777115 |
| 8  | C  | 0.167918  | 2.325619  | -3.217777 |
| 9  | H  | 0.553185  | 2.294832  | -4.228686 |
| 10 | C  | 0.220914  | 3.393090  | -2.189618 |
| 11 | C  | 1.961455  | 2.399322  | -0.792284 |
| 12 | H  | 2.712927  | 2.635041  | -0.034112 |
| 13 | C  | 2.177194  | 1.146606  | -1.591611 |
| 14 | H  | 2.991924  | 0.807706  | -2.217980 |
| 15 | C  | 0.603477  | -0.819479 | -1.043249 |
| 16 | N  | -0.575163 | -1.440426 | -1.069125 |
| 17 | N  | 1.607460  | -1.666484 | -0.671384 |
| 18 | N  | 1.059450  | -2.830802 | -0.458476 |
| 19 | C  | 1.623930  | 3.704333  | -1.584334 |
| 20 | C  | 2.342703  | 5.869153  | -1.206134 |
| 21 | C  | 3.313011  | 5.164902  | -2.147057 |
| 22 | H  | 1.674856  | 6.549752  | -1.740427 |
| 23 | H  | 2.829343  | 6.391446  | -0.381654 |
| 24 | H  | 3.585470  | 5.753045  | -3.023591 |
| 25 | H  | 4.220600  | 4.835361  | -1.627822 |
| 26 | O  | 1.596278  | 4.774673  | -0.658428 |
| 27 | O  | 2.556874  | 4.032218  | -2.589211 |
| 28 | Br | -0.759846 | 5.063060  | -2.742534 |
| 29 | N  | -0.233250 | -2.666884 | -0.698504 |
| 30 | H  | -0.899265 | -3.422474 | -0.614883 |

---



**Table S32.** Atomic coordinates for optimized structure of biradical **15C** obtained using the B3LYP/6-311++G(d,p) level of theory

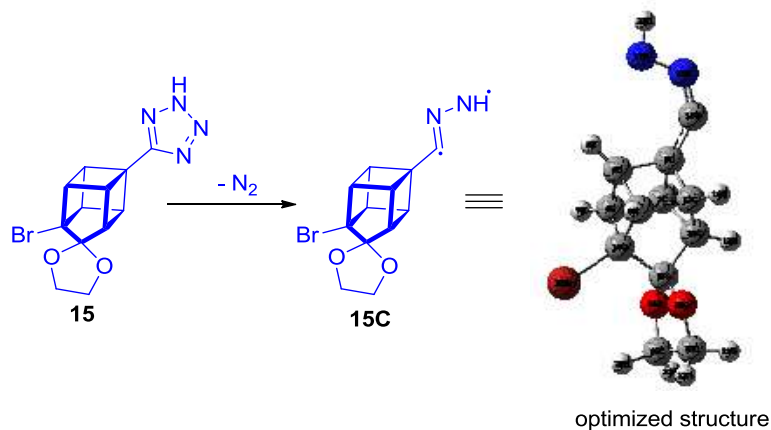

| Center Number | Atomic Symbol | Coordinates (Angstroms) |           |           |
|---------------|---------------|-------------------------|-----------|-----------|
|               |               | X                       | Y         | Z         |
| 1             | C             | 0.974648                | 1.646774  | -0.185763 |
| 2             | C             | 0.568054                | 0.566810  | -1.271936 |
| 3             | C             | -0.540081               | 1.551143  | -1.831103 |
| 4             | C             | -0.145932               | 2.604428  | -0.744273 |
| 5             | H             | 1.008434                | 1.437895  | 0.879920  |
| 6             | H             | -1.549109               | 1.275873  | -2.117472 |
| 7             | H             | -0.833247               | 3.073803  | -0.046496 |
| 8             | C             | 0.529315                | 2.224745  | -2.752185 |
| 9             | H             | 0.439917                | 2.358105  | -3.826414 |
| 10            | C             | 0.624342                | 3.445509  | -1.797535 |
| 11            | C             | 2.243806                | 2.046936  | -0.986580 |
| 12            | H             | 3.213089                | 1.739817  | -0.600191 |
| 13            | C             | 1.650375                | 1.267289  | -2.191351 |
| 14            | H             | 2.279887                | 0.724502  | -2.891107 |
| 15            | C             | 0.509315                | -0.845593 | -1.019323 |
| 16            | N             | -0.330855               | -1.785519 | -1.090670 |

|    |    |           |           |           |
|----|----|-----------|-----------|-----------|
| 17 | C  | 2.093304  | 3.537057  | -1.319272 |
| 18 | C  | 3.038005  | 5.506036  | -0.594897 |
| 19 | C  | 3.839458  | 4.970885  | -1.775774 |
| 20 | H  | 2.358998  | 6.309986  | -0.892998 |
| 21 | H  | 3.651664  | 5.828733  | 0.246509  |
| 22 | H  | 4.053965  | 5.718286  | -2.539999 |
| 23 | H  | 4.772544  | 4.494917  | -1.452491 |
| 24 | O  | 2.293740  | 4.351622  | -0.183497 |
| 25 | O  | 2.956062  | 3.995176  | -2.339887 |
| 26 | Br | -0.217152 | 5.102212  | -2.388875 |
| 27 | N  | -1.593931 | -1.614536 | -1.506662 |
| 28 | H  | -2.021118 | -2.547362 | -1.445863 |

**Table S33.** Atomic coordinates for optimized structure of biradical **15D** obtained using the B3LYP/6-311++G(d,p) level of theory

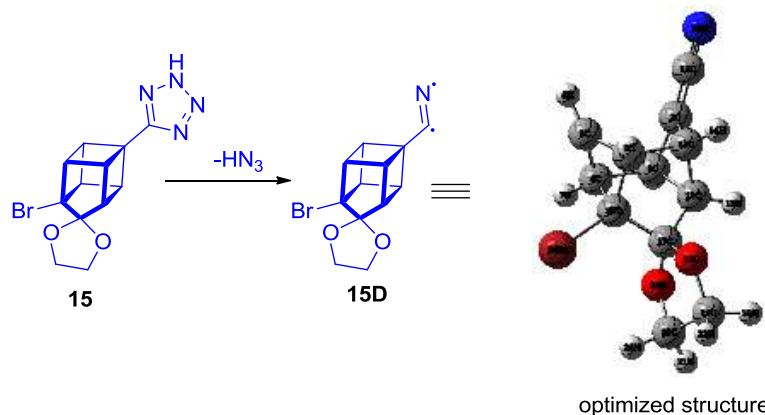

| Center Number | Atomic Symbol | Coordinates (Angstroms) |          |           |
|---------------|---------------|-------------------------|----------|-----------|
|               |               | X                       | Y        | Z         |
| 1             | C             | 0.622078                | 1.712341 | -0.334350 |
| 2             | C             | 0.586520                | 0.539374 | -1.282446 |
| 3             | C             | -0.970958               | 2.336072 | -2.208007 |

|    |    |           |           |           |
|----|----|-----------|-----------|-----------|
| 4  | C  | -0.363952 | 2.856297  | -0.931214 |
| 5  | H  | 0.544744  | 1.575594  | 0.741316  |
| 6  | H  | -1.829939 | 1.711494  | -2.416724 |
| 7  | H  | -0.944547 | 3.361436  | -0.162410 |
| 8  | C  | 0.371265  | 2.494798  | -2.872669 |
| 9  | H  | 0.487507  | 2.655193  | -3.942272 |
| 10 | C  | 0.619142  | 3.655615  | -1.851430 |
| 11 | C  | 1.986359  | 2.060163  | -1.031597 |
| 12 | H  | 2.878178  | 1.604110  | -0.606758 |
| 13 | C  | 1.365646  | 1.350042  | -2.288199 |
| 14 | H  | 1.985384  | 0.873244  | -3.043456 |
| 15 | C  | 0.198053  | -0.772782 | -1.187654 |
| 16 | N  | -0.122490 | -1.895793 | -1.102626 |
| 17 | C  | 2.037925  | 3.558044  | -1.292552 |
| 18 | C  | 3.181143  | 5.348092  | -0.405846 |
| 19 | C  | 3.981827  | 4.764119  | -1.563743 |
| 20 | H  | 2.638132  | 6.250766  | -0.699295 |
| 21 | H  | 3.773642  | 5.541567  | 0.488464  |
| 22 | H  | 4.343864  | 5.509865  | -2.271578 |
| 23 | H  | 4.819084  | 4.150243  | -1.212661 |
| 24 | O  | 2.259675  | 4.289301  | -0.105951 |
| 25 | O  | 3.015657  | 3.945328  | -2.234131 |
| 26 | Br | 0.032833  | 5.434348  | -2.397038 |

---

**Table S34.** Atomic coordinates for optimized structure of biradical **16A** obtained using the B3LYP/6-311++G(d,p) level of theory

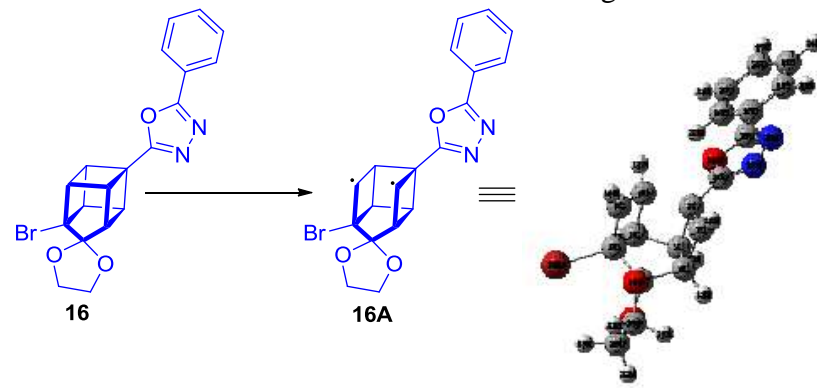

optimized structure

| Center Number | Atomic Symbol | Coordinates (Angstroms) |           |           |
|---------------|---------------|-------------------------|-----------|-----------|
|               |               | X                       | Y         | Z         |
| 1             | C             | 1.483494                | 0.252437  | -0.813695 |
| 2             | C             | 2.232304                | -0.520911 | 0.216038  |
| 3             | C             | 2.504692                | 0.847328  | 0.968337  |
| 4             | C             | 1.538767                | 1.543256  | -0.047522 |
| 5             | C             | 0.187730                | 0.850331  | 1.867101  |
| 6             | C             | 1.650757                | 0.409826  | 2.182026  |
| 7             | C             | -0.097841               | -0.531894 | 1.409681  |
| 8             | C             | 1.317370                | -0.967171 | 1.515784  |
| 9             | H             | 3.507407                | 1.241758  | 1.111147  |
| 10            | H             | 2.024023                | 0.510257  | 3.196265  |
| 11            | H             | 1.904414                | 2.420753  | -0.587186 |
| 12            | H             | 1.586791                | -1.941250 | 1.925259  |
| 13            | H             | -0.993566               | -0.970451 | 0.989794  |
| 14            | H             | 0.976492                | -0.046539 | -1.720873 |
| 15            | C             | 4.857229                | -2.889670 | 0.022712  |
| 16            | C             | 5.864230                | -3.699780 | 0.697525  |

|    |    |           |           |           |
|----|----|-----------|-----------|-----------|
| 17 | C  | 6.679564  | -4.552076 | -0.061969 |
| 18 | C  | 6.028714  | -3.639249 | 2.087602  |
| 19 | C  | 7.643694  | -5.330367 | 0.566308  |
| 20 | H  | 6.545114  | -4.591509 | -1.135704 |
| 21 | C  | 6.997235  | -4.422556 | 2.708426  |
| 22 | H  | 5.401352  | -2.981165 | 2.675763  |
| 23 | C  | 7.805710  | -5.268927 | 1.951594  |
| 24 | H  | 8.271050  | -5.987539 | -0.024861 |
| 25 | H  | 7.119993  | -4.371688 | 3.784180  |
| 26 | N  | 4.592426  | -2.816629 | -1.244714 |
| 27 | C  | 0.263819  | 1.947851  | 0.764226  |
| 28 | C  | -1.254928 | 3.372418  | -0.209779 |
| 29 | C  | -0.655168 | 4.057319  | 1.013380  |
| 30 | H  | -0.803878 | 3.730907  | -1.142435 |
| 31 | H  | -2.340197 | 3.450457  | -0.273873 |
| 32 | H  | -0.305032 | 5.072106  | 0.820646  |
| 33 | H  | -1.342191 | 4.054132  | 1.863717  |
| 34 | O  | 0.487968  | 3.239467  | 1.297696  |
| 35 | O  | -0.920873 | 1.996533  | 0.005243  |
| 36 | Br | -0.961265 | 1.418506  | 3.416721  |
| 37 | C  | 3.257790  | -1.486513 | -0.197449 |
| 38 | N  | 3.552904  | -1.903016 | -1.387431 |
| 39 | O  | 4.044817  | -2.071566 | 0.757674  |
| 40 | H  | 8.559068  | -5.878265 | 2.437713  |

---

**Table S35.** Atomic coordinates for optimized structure of biradical **16B** obtained using the B3LYP/6-311++G(d,p) level of theory

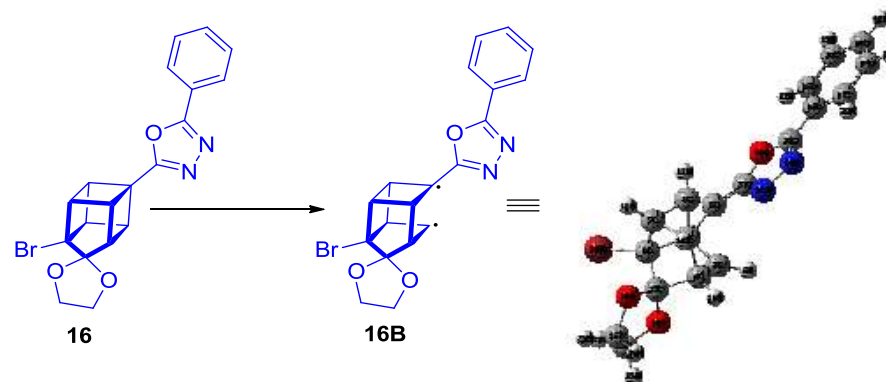

optimized structure

| Center Number | Atomic Symbol | Coordinates (Angstroms) |           |           |
|---------------|---------------|-------------------------|-----------|-----------|
|               |               | X                       | Y         | Z         |
| 1             | C             | 1.517274                | 0.509372  | 0.037459  |
| 2             | C             | 2.364040                | -0.632536 | 0.544751  |
| 3             | C             | 2.493688                | 1.470474  | 2.086611  |
| 4             | C             | 1.872319                | 1.867400  | 0.784147  |
| 5             | C             | 0.160579                | 0.985221  | 2.016584  |
| 6             | C             | 1.517632                | 0.508894  | 2.673696  |
| 7             | C             | 0.349696                | -0.089501 | 0.946650  |
| 8             | C             | 1.482489                | -0.822031 | 1.736519  |
| 9             | H             | 3.506058                | 1.650161  | 2.415992  |
| 10            | H             | 1.549880                | 0.333588  | 3.745785  |
| 11            | H             | 2.399974                | 2.596043  | 0.173090  |
| 12            | H             | 1.385945                | -1.776931 | 2.248389  |
| 13            | H             | -0.477731               | -0.588906 | 0.451017  |
| 14            | H             | 1.353859                | 0.627642  | -1.030815 |
| 15            | C             | 4.894774                | -2.863448 | -0.272392 |
| 16            | C             | 5.702927                | -4.029499 | 0.037247  |

|    |    |           |           |           |
|----|----|-----------|-----------|-----------|
| 17 | C  | 6.681317  | -4.453777 | -0.877002 |
| 18 | C  | 5.519555  | -4.737443 | 1.234419  |
| 19 | C  | 7.459306  | -5.568095 | -0.591987 |
| 20 | H  | 6.815553  | -3.901384 | -1.798521 |
| 21 | C  | 6.304431  | -5.852282 | 1.510532  |
| 22 | H  | 4.765955  | -4.411578 | 1.940316  |
| 23 | C  | 7.274535  | -6.270830 | 0.600701  |
| 24 | H  | 8.212612  | -5.891672 | -1.301065 |
| 25 | H  | 6.158413  | -6.395270 | 2.437258  |
| 26 | N  | 4.951627  | -2.101560 | -1.334410 |
| 27 | C  | 0.464727  | 2.317801  | 1.288418  |
| 28 | C  | -0.850309 | 3.940752  | 0.310180  |
| 29 | C  | -0.591400 | 4.302287  | 1.766862  |
| 30 | H  | -0.222248 | 4.524066  | -0.372941 |
| 31 | H  | -1.895278 | 4.023929  | 0.010578  |
| 32 | H  | -0.298693 | 5.340702  | 1.922702  |
| 33 | H  | -1.442593 | 4.052017  | 2.406770  |
| 34 | O  | 0.533565  | 3.473098  | 2.087806  |
| 35 | O  | -0.480428 | 2.558595  | 0.264106  |
| 36 | Br | -1.447647 | 0.911915  | 3.111293  |
| 37 | C  | 3.398099  | -1.341961 | -0.027856 |
| 38 | N  | 4.005695  | -1.128705 | -1.198766 |
| 39 | O  | 3.937420  | -2.449454 | 0.602264  |
| 40 | H  | 7.884364  | -7.140180 | 0.818679  |

---

**Table S36.** Atomic coordinates for optimized structure of biradical **18A** obtained using the B3LYP/6-311++G(d,p) level of theory

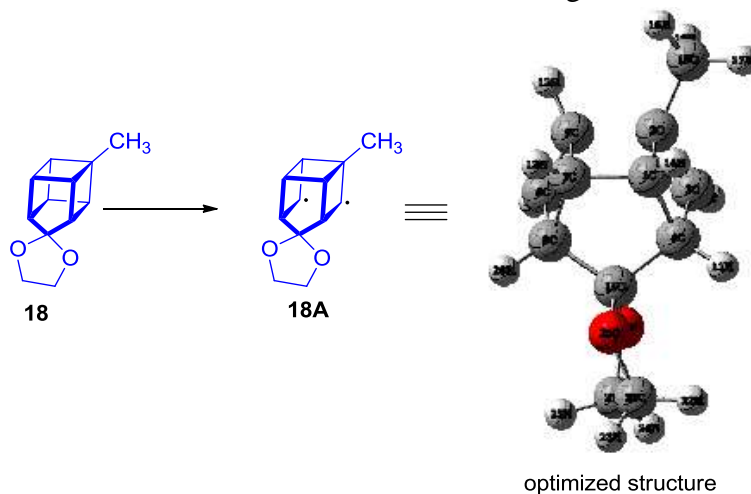

| Center Number | Atomic Symbol | Coordinates (Angstroms) |           |           |
|---------------|---------------|-------------------------|-----------|-----------|
|               |               | X                       | Y         | Z         |
| 1             | C             | -0.072262               | -0.688275 | -0.016352 |
| 2             | C             | 1.492354                | -0.815542 | -0.153634 |
| 3             | C             | 1.488964                | 0.514402  | -0.835575 |
| 4             | C             | 0.031637                | 0.775771  | -0.559295 |
| 5             | C             | 0.171252                | 0.911318  | 1.901630  |
| 6             | C             | 1.655084                | 0.676348  | 2.026759  |
| 7             | C             | 0.024764                | -0.605106 | 1.528357  |
| 8             | C             | 1.590417                | -0.704616 | 1.477642  |
| 9             | H             | 2.286268                | 1.173217  | -1.162989 |
| 10            | H             | 2.475587                | 1.361814  | 2.205338  |
| 11            | H             | -0.589964               | 1.063889  | -1.413478 |
| 12            | H             | 2.179946                | -1.510382 | 1.922787  |
| 13            | H             | -0.592110               | -1.245469 | 2.155180  |
| 14            | H             | -0.763675               | -1.383556 | -0.489967 |
| 15            | C             | 2.221935                | -2.002260 | -0.747616 |



|    |   |           |           |           |
|----|---|-----------|-----------|-----------|
| 16 | H | 3.306271  | -1.851472 | -0.701725 |
| 17 | H | 1.946578  | -2.146701 | -1.796663 |
| 18 | H | 1.988755  | -2.923253 | -0.203554 |
| 19 | C | -0.279917 | 1.700748  | 0.647852  |
| 20 | C | -1.938242 | 3.249175  | 0.257431  |
| 21 | C | -0.664896 | 3.986220  | 0.651802  |
| 22 | H | -2.078541 | 3.240316  | -0.831207 |
| 23 | H | -2.841822 | 3.626127  | 0.737769  |
| 24 | H | -0.411777 | 4.820048  | -0.004849 |
| 25 | H | -0.708582 | 4.336993  | 1.690030  |
| 26 | O | -1.685693 | 1.934529  | 0.749736  |
| 27 | O | 0.336008  | 2.977087  | 0.506187  |
| 28 | H | -0.353463 | 1.289591  | 2.784022  |

**Table S37.** Atomic coordinates for optimized structure of biradical **18B** obtained using the B3LYP/6-311++G(d,p) level of theory

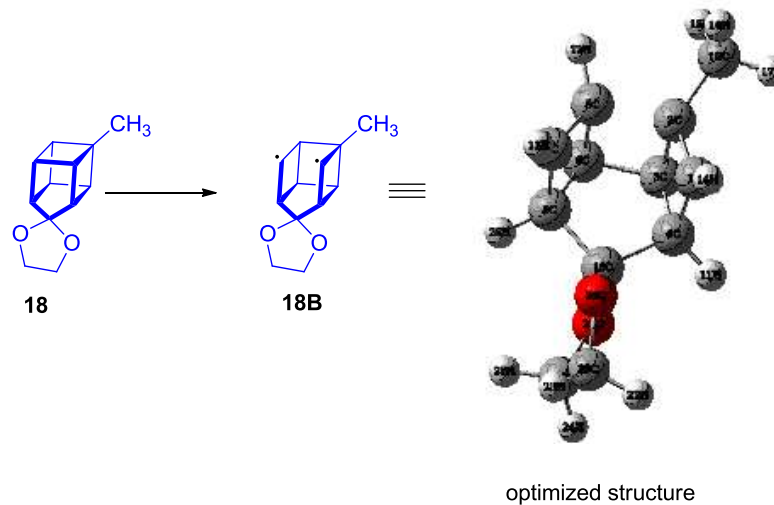

| Center | Atomic | Coordinates (Angstroms) |   |   |
|--------|--------|-------------------------|---|---|
| Number | Symbol | X                       | Y | Z |

|    |   |           |           |           |
|----|---|-----------|-----------|-----------|
| 1  | C | 0.043010  | -0.486893 | -0.757564 |
| 2  | C | 1.324000  | -0.953793 | -0.145388 |
| 3  | C | 1.834929  | 0.535562  | -0.214565 |
| 4  | C | 0.403530  | 0.973535  | -0.673084 |
| 5  | C | 0.454718  | 1.153187  | 1.788229  |
| 6  | C | 1.865168  | 0.643318  | 1.331359  |
| 7  | C | 0.103583  | -0.277425 | 2.106145  |
| 8  | C | 1.340177  | -0.827200 | 1.487732  |
| 9  | H | 2.697696  | 0.836314  | -0.806956 |
| 10 | H | 2.751758  | 1.014874  | 1.840726  |
| 11 | H | 0.303564  | 1.565958  | -1.587507 |
| 12 | H | 1.891609  | -1.638647 | 1.969846  |
| 13 | H | -0.825680 | -0.732629 | 2.428870  |
| 14 | H | -0.905033 | -0.980959 | -0.942294 |
| 15 | C | 2.064977  | -2.155861 | -0.692259 |
| 16 | H | 3.051584  | -2.257591 | -0.228668 |
| 17 | H | 2.203902  | -2.071385 | -1.774272 |
| 18 | H | 1.505747  | -3.077358 | -0.495503 |
| 19 | C | -0.209266 | 1.749979  | 0.518453  |
| 20 | C | -2.158011 | 2.997286  | 0.370482  |
| 21 | C | -0.999559 | 3.893845  | 0.787829  |
| 22 | H | -2.414480 | 3.137973  | -0.686523 |
| 23 | H | -3.054029 | 3.114357  | 0.982073  |
| 24 | H | -0.968527 | 4.855371  | 0.274315  |
| 25 | H | -0.987175 | 4.057568  | 1.873159  |
| 26 | O | -1.630860 | 1.687023  | 0.587139  |
| 27 | O | 0.131569  | 3.129634  | 0.374251  |
| 28 | H | 0.395973  | 1.874919  | 2.609593  |

---

**Table S38.** Atomic coordinates for optimized structure of biradical **18aA** obtained using the B3LYP/6-311++G(d,p) level of theory

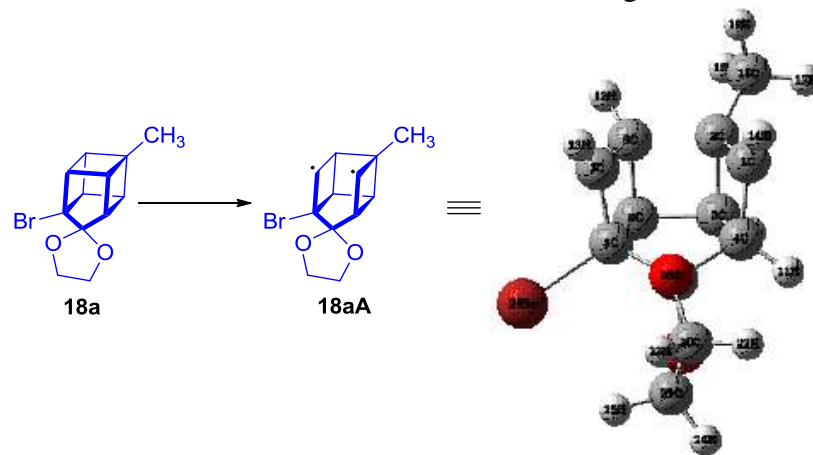

|        |        | optimized structure     |           |           |
|--------|--------|-------------------------|-----------|-----------|
| Center | Atomic | Coordinates (Angstroms) |           |           |
| Number | Symbol | X                       | Y         | Z         |
| 1      | C      | 0.036008                | -0.461635 | -0.737796 |
| 2      | C      | 1.325084                | -0.946109 | -0.156747 |
| 3      | C      | 1.831241                | 0.546276  | -0.177011 |
| 4      | C      | 0.392047                | 0.994026  | -0.602075 |
| 5      | C      | 0.470697                | 1.078666  | 1.836366  |
| 6      | C      | 1.878695                | 0.598618  | 1.369408  |
| 7      | C      | 0.103468                | -0.334091 | 2.091640  |
| 8      | C      | 1.346298                | -0.873633 | 1.480648  |
| 9      | H      | 2.686506                | 0.874350  | -0.764540 |
| 10     | H      | 2.755665                | 0.962044  | 1.896306  |
| 11     | H      | 0.285693                | 1.617366  | -1.494194 |
| 12     | H      | 1.885926                | -1.700383 | 1.948293  |
| 13     | H      | -0.825936               | -0.773015 | 2.431158  |
| 14     | H      | -0.906526               | -0.955371 | -0.948124 |

|    |    |           |           |           |
|----|----|-----------|-----------|-----------|
| 15 | C  | 2.065817  | -2.127666 | -0.744757 |
| 16 | H  | 3.055006  | -2.241950 | -0.290308 |
| 17 | H  | 2.197962  | -2.007125 | -1.823910 |
| 18 | H  | 1.509209  | -3.055803 | -0.575164 |
| 19 | C  | -0.213723 | 1.763184  | 0.615457  |
| 20 | C  | -2.157781 | 2.968175  | 0.343971  |
| 21 | C  | -1.029761 | 3.925727  | 0.710361  |
| 22 | H  | -2.382203 | 2.992182  | -0.729133 |
| 23 | H  | -3.074108 | 3.125612  | 0.913368  |
| 24 | H  | -0.971388 | 4.804105  | 0.066312  |
| 25 | H  | -1.077623 | 4.231982  | 1.758784  |
| 26 | O  | -1.620365 | 1.693615  | 0.709840  |
| 27 | O  | 0.138258  | 3.128454  | 0.479575  |
| 28 | Br | 0.387481  | 2.226158  | 3.495504  |

**Table S39.** Atomic coordinates for optimized structure of biradical **18aB** obtained using the B3LYP/6-311++G(d,p) level of theory

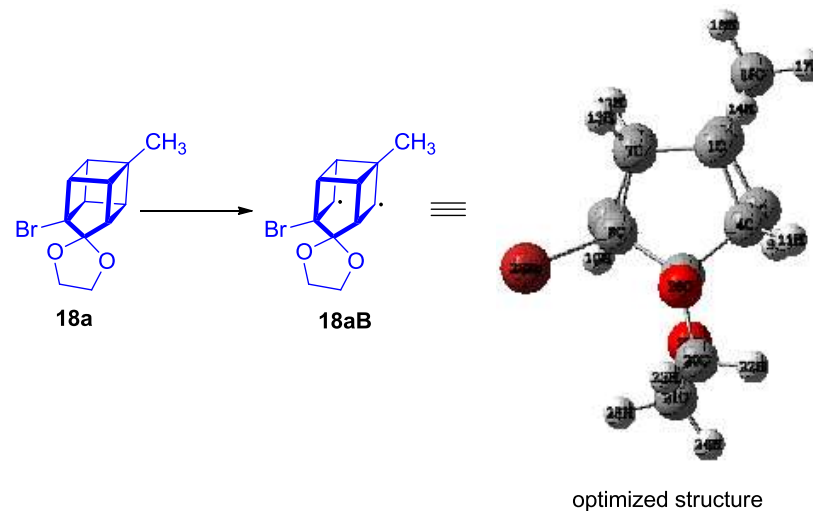

| Center | Atomic | Coordinates (Angstroms) |           |           |
|--------|--------|-------------------------|-----------|-----------|
| Number | Symbol | X                       | Y         | Z         |
| 1      | C      | -0.055764               | -0.695371 | -0.048518 |
| 2      | C      | 1.509774                | -0.835107 | -0.163956 |
| 3      | C      | 1.525613                | 0.492049  | -0.851985 |
| 4      | C      | 0.068245                | 0.765831  | -0.596655 |
| 5      | C      | 0.181827                | 0.907686  | 1.837639  |
| 6      | C      | 1.641854                | 0.692469  | 1.972265  |
| 7      | C      | 0.020174                | -0.605460 | 1.495803  |
| 8      | C      | 1.586517                | -0.704244 | 1.467596  |
| 9      | H      | 2.329898                | 1.134779  | -1.192748 |
| 10     | H      | 2.442629                | 1.389802  | 2.182900  |
| 11     | H      | -0.540460               | 1.052340  | -1.459391 |
| 12     | H      | 2.172112                | -1.494218 | 1.943425  |
| 13     | H      | -0.610129               | -1.221593 | 2.129904  |
| 14     | H      | -0.748933               | -1.385634 | -0.525292 |
| 15     | C      | 2.239972                | -2.032495 | -0.733198 |
| 16     | H      | 3.324207                | -1.888232 | -0.672657 |
| 17     | H      | 1.979141                | -2.184915 | -1.784529 |
| 18     | H      | 1.991984                | -2.946112 | -0.183737 |
| 19     | C      | -0.286823               | 1.715059  | 0.588202  |
| 20     | C      | -1.953176               | 3.292688  | 0.323418  |
| 21     | C      | -0.654078               | 3.987906  | 0.715232  |
| 22     | H      | -2.169997               | 3.407947  | -0.745385 |
| 23     | H      | -2.816709               | 3.610076  | 0.909023  |
| 24     | H      | -0.416980               | 4.856313  | 0.099566  |
| 25     | H      | -0.641409               | 4.264988  | 1.773100  |
| 26     | O      | -1.686418               | 1.921211  | 0.628028  |
| 27     | O      | 0.328641                | 2.977570  | 0.452869  |
| 28     | Br     | -0.670071               | 1.578425  | 3.542313  |

**Table S40.** Atomic coordinates for optimized structure of biradical **19A** obtained using the B3LYP/6-311++G(d,p) level of theory

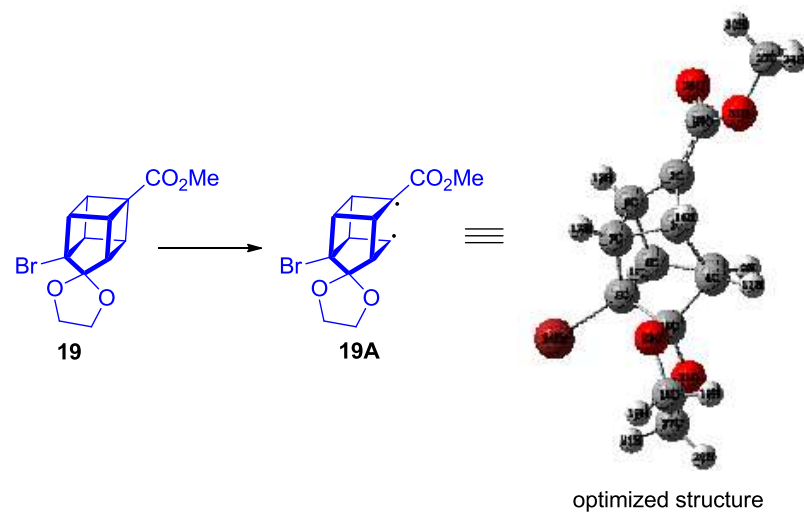

| Center Number | Atomic Symbol | Coordinates (Angstroms) |           |           |
|---------------|---------------|-------------------------|-----------|-----------|
|               |               | X                       | Y         | Z         |
| 1             | C             | 0.537337                | -0.612917 | 0.322449  |
| 2             | C             | 1.956930                | -1.115153 | 0.342889  |
| 3             | C             | 1.787845                | 1.342007  | -0.507830 |
| 4             | C             | 0.417537                | 0.739252  | -0.505920 |
| 5             | C             | 0.767900                | 1.430328  | 1.646383  |
| 6             | C             | 2.177830                | 1.358218  | 0.930978  |
| 7             | C             | 0.818254                | -0.088436 | 1.804539  |
| 8             | C             | 2.338225                | -0.180643 | 1.435569  |
| 9             | H             | 2.389832                | 1.628062  | -1.356349 |
| 10            | H             | 2.961480                | 2.042505  | 1.243918  |
| 11            | H             | -0.096609               | 0.644244  | -1.459561 |
| 12            | H             | 3.156893                | -0.389468 | 2.119422  |

|    |    |           |           |           |
|----|----|-----------|-----------|-----------|
| 13 | H  | 0.351863  | -0.617943 | 2.630162  |
| 14 | H  | -0.282708 | -1.305110 | 0.146867  |
| 15 | C  | -0.280456 | 1.674912  | 0.533181  |
| 16 | C  | -2.518715 | 2.231149  | 0.524900  |
| 17 | C  | -1.678481 | 3.499943  | 0.456969  |
| 18 | H  | -2.933842 | 1.963563  | -0.453699 |
| 19 | H  | -3.317748 | 2.267117  | 1.265754  |
| 20 | H  | -2.009110 | 4.211899  | -0.299509 |
| 21 | H  | -1.606315 | 3.994542  | 1.429970  |
| 22 | O  | -1.564997 | 1.248863  | 0.943040  |
| 23 | O  | -0.397818 | 2.993670  | 0.057700  |
| 24 | Br | 0.623394  | 2.514518  | 3.256279  |
| 25 | C  | 2.656032  | -2.209575 | -0.272251 |
| 26 | O  | 3.818857  | -2.507217 | -0.050893 |
| 27 | C  | 2.484272  | -4.010042 | -1.802553 |
| 28 | H  | 1.717583  | -4.431719 | -2.449537 |
| 29 | H  | 3.342382  | -3.679990 | -2.390923 |
| 30 | H  | 2.818923  | -4.750104 | -1.073282 |
| 31 | O  | 1.862537  | -2.895905 | -1.144325 |

---

**Table S41.** Atomic coordinates for optimized structure of biradical **19B** obtained using the B3LYP/6-311++G(d,p) level of theory

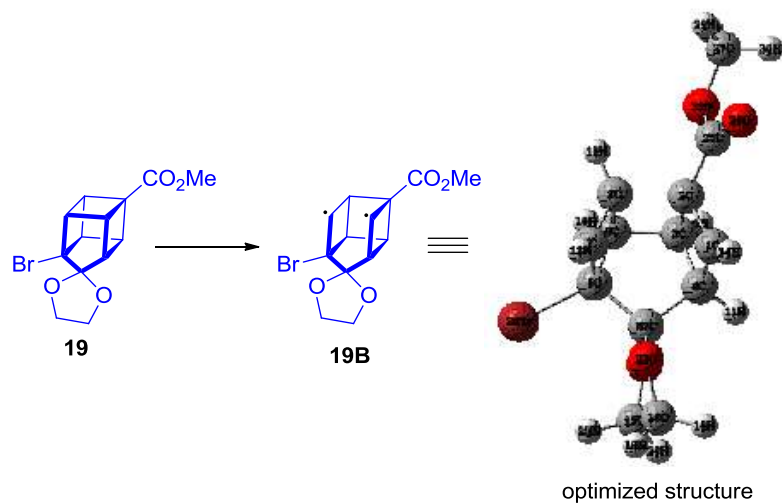

| Center Number | Atomic Symbol | Coordinates (Angstroms) |           |           |
|---------------|---------------|-------------------------|-----------|-----------|
|               |               | X                       | Y         | Z         |
| 1             | C             | -0.056900               | -0.380328 | -0.944999 |
| 2             | C             | 1.116370                | -1.051750 | -0.326641 |
| 3             | C             | 1.792034                | 0.357790  | -0.160040 |
| 4             | C             | 0.446896                | 1.004235  | -0.638267 |
| 5             | C             | 0.346780                | 0.859712  | 1.798414  |
| 6             | C             | 1.730104                | 0.270570  | 1.383248  |
| 7             | C             | -0.183329               | -0.523426 | 1.885512  |
| 8             | C             | 1.046815                | -1.136637 | 1.327087  |
| 9             | H             | 2.721735                | 0.619150  | -0.657643 |
| 10            | H             | 2.600490                | 0.488321  | 1.993865  |
| 11            | H             | 0.481938                | 1.713345  | -1.469681 |
| 12            | H             | 1.465866                | -2.054916 | 1.739401  |
| 13            | H             | -1.174830               | -0.891691 | 2.113985  |
| 14            | H             | -0.999422               | -0.754681 | -1.321558 |



|    |    |           |           |           |
|----|----|-----------|-----------|-----------|
| 15 | C  | -0.167239 | 1.723548  | 0.606267  |
| 16 | C  | -1.948139 | 3.155654  | 0.325790  |
| 17 | C  | -0.759483 | 3.944105  | 0.862648  |
| 18 | H  | -2.084351 | 3.302106  | -0.752147 |
| 19 | H  | -2.884981 | 3.359531  | 0.844547  |
| 20 | H  | -0.559412 | 4.866734  | 0.316644  |
| 21 | H  | -0.856863 | 4.153524  | 1.931079  |
| 22 | O  | -1.574952 | 1.800584  | 0.598459  |
| 23 | O  | 0.334751  | 3.046589  | 0.632557  |
| 24 | Br | 0.255936  | 1.844258  | 3.550708  |
| 25 | C  | 1.715797  | -2.274878 | -0.948391 |
| 26 | O  | 1.103174  | -3.105545 | -1.575395 |
| 27 | C  | 3.707608  | -3.534980 | -1.188508 |
| 28 | H  | 4.746757  | -3.429985 | -0.884747 |
| 29 | H  | 3.270310  | -4.437786 | -0.759809 |
| 30 | H  | 3.626925  | -3.579527 | -2.275274 |
| 31 | O  | 3.038720  | -2.363055 | -0.682776 |

**Table S42.** Atomic coordinates for optimized structure of biradical **21aA** obtained using the B3LYP/6-311++G(d,p) level of theory

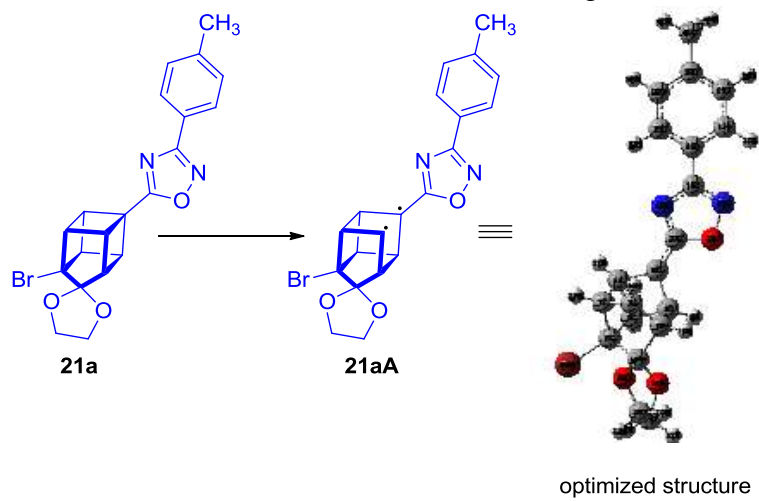

| Center | Atomic | Coordinates (Angstroms) |           |           |
|--------|--------|-------------------------|-----------|-----------|
| Number | Symbol | X                       | Y         | Z         |
| 1      | C      | 0.493981                | -0.270319 | -0.234414 |
| 2      | C      | 2.712611                | -0.402664 | 1.127067  |
| 3      | C      | 2.284439                | 1.019659  | 0.863328  |
| 4      | C      | 1.140636                | 1.080741  | -0.239524 |
| 5      | C      | -0.000130               | 0.971449  | 1.739440  |
| 6      | C      | 1.449355                | 0.906059  | 2.219185  |
| 7      | C      | 0.159368                | -0.506674 | 1.199567  |
| 8      | C      | 1.550759                | -0.643868 | 2.031507  |
| 9      | H      | 3.031276                | 1.803746  | 0.761698  |
| 10     | H      | 1.813986                | 1.445650  | 3.088372  |
| 11     | H      | 1.457635                | 1.488780  | -1.196604 |
| 12     | H      | 1.578234                | -1.385764 | 2.825385  |
| 13     | H      | -0.607188               | -1.240261 | 1.434521  |
| 14     | H      | 0.496648                | -1.003785 | -1.026908 |
| 15     | C      | 5.427604                | -2.530904 | 0.677363  |
| 16     | C      | 6.218049                | -3.758660 | 0.839390  |
| 17     | C      | 7.480131                | -3.889144 | 0.244250  |
| 18     | C      | 5.712542                | -4.820618 | 1.596033  |
| 19     | C      | 8.213339                | -5.057007 | 0.408915  |
| 20     | H      | 7.877940                | -3.073346 | -0.346889 |
| 21     | C      | 6.456085                | -5.986028 | 1.753994  |
| 22     | H      | 4.735967                | -4.724977 | 2.053975  |
| 23     | C      | 7.718311                | -6.125669 | 1.168226  |
| 24     | H      | 9.187705                | -5.142852 | -0.061490 |
| 25     | H      | 6.046922                | -6.801559 | 2.341568  |
| 26     | N      | 5.861623                | -1.500404 | -0.033502 |
| 27     | C      | 0.043175                | 1.905552  | 0.504075  |
| 28     | C      | -1.409888               | 3.386121  | -0.496225 |
| 29     | C      | -0.619547               | 4.109940  | 0.585977  |

|    |    |           |           |           |
|----|----|-----------|-----------|-----------|
| 30 | H  | -1.030563 | 3.612454  | -1.499360 |
| 31 | H  | -2.483848 | 3.569005  | -0.459032 |
| 32 | H  | -0.213827 | 5.071819  | 0.271835  |
| 33 | H  | -1.202021 | 4.230893  | 1.504180  |
| 34 | O  | 0.478840  | 3.215616  | 0.807647  |
| 35 | O  | -1.180721 | 2.008236  | -0.180158 |
| 36 | Br | -1.380014 | 1.314612  | 3.066664  |
| 37 | C  | 3.864166  | -1.127061 | 0.843861  |
| 38 | O  | 4.838806  | -0.562008 | 0.067891  |
| 39 | N  | 4.199365  | -2.347963 | 1.238737  |
| 40 | C  | 8.536297  | -7.377654 | 1.366425  |
| 41 | H  | 9.261047  | -7.246399 | 2.177607  |
| 42 | H  | 7.904632  | -8.229996 | 1.625632  |
| 43 | H  | 9.099915  | -7.632555 | 0.465493  |

**Table S43.** Atomic coordinates for optimized structure of biradical **21aB** obtained using the B3LYP/6-311++G(d,p) level of theory

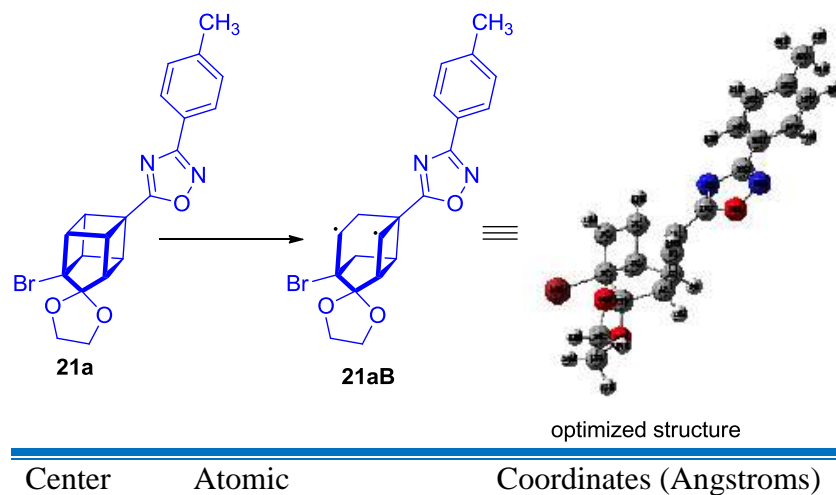

| Number | Symbol | X         | Y         | Z         |
|--------|--------|-----------|-----------|-----------|
| 1      | C      | 1.573274  | 0.193979  | -0.695283 |
| 2      | C      | 2.342461  | -0.481269 | 0.391704  |
| 3      | C      | 2.560949  | 0.956292  | 1.038226  |
| 4      | C      | 1.568029  | 1.535671  | -0.021785 |
| 5      | C      | 0.247278  | 0.920901  | 1.942344  |
| 6      | C      | 1.728641  | 0.566797  | 2.281703  |
| 7      | C      | 0.022229  | -0.501004 | 1.583450  |
| 8      | C      | 1.458944  | -0.865991 | 1.709741  |
| 9      | H      | 3.549392  | 1.394799  | 1.145922  |
| 10     | H      | 2.099211  | 0.750581  | 3.285011  |
| 11     | H      | 1.894594  | 2.389342  | -0.621243 |
| 12     | H      | 1.779438  | -1.794602 | 2.180783  |
| 13     | H      | -0.856831 | -1.008434 | 1.208041  |
| 14     | H      | 1.057700  | -0.189175 | -1.566591 |
| 15     | C      | 4.984130  | -2.840508 | 0.071490  |
| 16     | C      | 5.906017  | -3.885642 | 0.532400  |
| 17     | C      | 6.894723  | -4.400950 | -0.317494 |
| 18     | C      | 5.805469  | -4.383385 | 1.835272  |
| 19     | C      | 7.758225  | -5.389364 | 0.134277  |
| 20     | H      | 6.977740  | -4.024078 | -1.329630 |
| 21     | C      | 6.677019  | -5.374561 | 2.277097  |
| 22     | H      | 5.041280  | -3.990741 | 2.494226  |
| 23     | C      | 7.668842  | -5.893155 | 1.439449  |
| 24     | H      | 8.515981  | -5.779905 | -0.537489 |
| 25     | H      | 6.582653  | -5.751626 | 3.290234  |
| 26     | N      | 5.016140  | -2.343510 | -1.142360 |
| 27     | C      | 0.273500  | 1.937087  | 0.760533  |
| 28     | C      | -1.315013 | 3.207015  | -0.312958 |
| 29     | C      | -0.752707 | 4.009105  | 0.855004  |
| 30     | H      | -0.882829 | 3.519803  | -1.270690 |

|    |    |           |           |           |
|----|----|-----------|-----------|-----------|
| 31 | H  | -2.402861 | 3.223700  | -0.378945 |
| 32 | H  | -0.455928 | 5.024195  | 0.588606  |
| 33 | H  | -1.438307 | 4.030942  | 1.706084  |
| 34 | O  | 0.431981  | 3.274553  | 1.193539  |
| 35 | O  | -0.910125 | 1.869570  | 0.000193  |
| 36 | Br | -0.922709 | 1.550304  | 3.451171  |
| 37 | C  | 3.436979  | -1.421771 | 0.088979  |
| 38 | O  | 3.984183  | -1.393594 | -1.139574 |
| 39 | N  | 4.002496  | -2.289764 | 0.873787  |
| 40 | C  | 8.631939  | -6.946135 | 1.928761  |
| 41 | H  | 9.581841  | -6.494278 | 2.235145  |
| 42 | H  | 8.230722  | -7.483848 | 2.790319  |
| 43 | H  | 8.856950  | -7.675151 | 1.146256  |

**Table S44.** Atomic coordinates for optimized structure of biradical **21bA** obtained using the B3LYP/6-311++G(d,p) level of theory

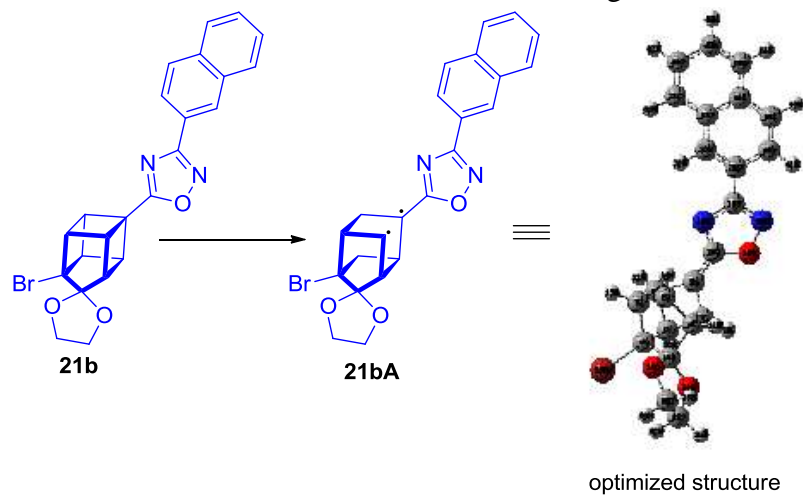

| Center | Atomic | Coordinates (Angstroms) |   |   |
|--------|--------|-------------------------|---|---|
| Number | Symbol | X                       | Y | Z |

|    |    |           |           |           |
|----|----|-----------|-----------|-----------|
| 1  | C  | 0.338042  | -0.183508 | -0.432735 |
| 2  | C  | 2.440813  | 0.144012  | 1.071018  |
| 3  | C  | 2.022274  | 1.420718  | 0.385806  |
| 4  | C  | 0.969557  | 1.130882  | -0.772245 |
| 5  | C  | -0.324651 | 1.548082  | 1.066625  |
| 6  | C  | 1.082003  | 1.665514  | 1.652071  |
| 7  | C  | -0.109049 | -0.016508 | 0.980064  |
| 8  | C  | 1.211674  | 0.128222  | 1.917019  |
| 9  | H  | 2.766244  | 2.168450  | 0.121068  |
| 10 | H  | 1.370583  | 2.437697  | 2.359147  |
| 11 | H  | 1.359472  | 1.262960  | -1.778999 |
| 12 | H  | 1.183281  | -0.359890 | 2.887766  |
| 13 | H  | -0.885657 | -0.677599 | 1.355266  |
| 14 | H  | 0.409936  | -1.109908 | -0.982817 |
| 15 | C  | 5.202398  | -1.942030 | 1.426540  |
| 16 | N  | 5.687285  | -1.123343 | 0.505424  |
| 17 | C  | -0.190810 | 2.097718  | -0.375688 |
| 18 | C  | -1.564444 | 3.188639  | -1.866866 |
| 19 | C  | -0.866408 | 4.215485  | -0.984442 |
| 20 | H  | -1.106069 | 3.124925  | -2.860494 |
| 21 | H  | -2.638389 | 3.346140  | -1.966647 |
| 22 | H  | -0.437035 | 5.053634  | -1.533784 |
| 23 | H  | -1.522259 | 4.585506  | -0.190740 |
| 24 | O  | 0.210567  | 3.452626  | -0.424650 |
| 25 | O  | -1.358169 | 1.967759  | -1.147362 |
| 26 | Br | -1.811103 | 2.207578  | 2.133265  |
| 27 | C  | 3.619001  | -0.593662 | 1.088274  |
| 28 | O  | 4.652219  | -0.223746 | 0.270875  |
| 29 | N  | 3.929099  | -1.654920 | 1.819812  |
| 30 | C  | 5.426164  | -3.916533 | 2.888249  |
| 31 | C  | 6.160287  | -5.008573 | 3.413496  |
| 32 | C  | 5.987437  | -3.062374 | 1.961573  |
| 33 | C  | 5.601801  | -5.903513 | 4.364369  |

|    |   |          |           |          |
|----|---|----------|-----------|----------|
| 34 | C | 7.504740 | -5.218660 | 2.972159 |
| 35 | C | 7.324950 | -3.273202 | 1.524224 |
| 36 | H | 4.407251 | -3.749743 | 3.217242 |
| 37 | C | 6.336921 | -6.955917 | 4.855564 |
| 38 | H | 4.581732 | -5.742735 | 4.697151 |
| 39 | C | 8.236272 | -6.313038 | 3.499405 |
| 40 | C | 8.056899 | -4.320561 | 2.018878 |
| 41 | H | 7.753516 | -2.595144 | 0.797034 |
| 42 | C | 7.666777 | -7.162375 | 4.419100 |
| 43 | H | 5.899915 | -7.633035 | 5.580775 |
| 44 | H | 9.256081 | -6.471306 | 3.164346 |
| 45 | H | 9.076774 | -4.476507 | 1.683163 |
| 46 | H | 8.236511 | -7.995952 | 4.814210 |

**Table S45.** Atomic coordinates for optimized structure of biradical **21bB** obtained using the B3LYP/6-311++G(d,p) level of theory

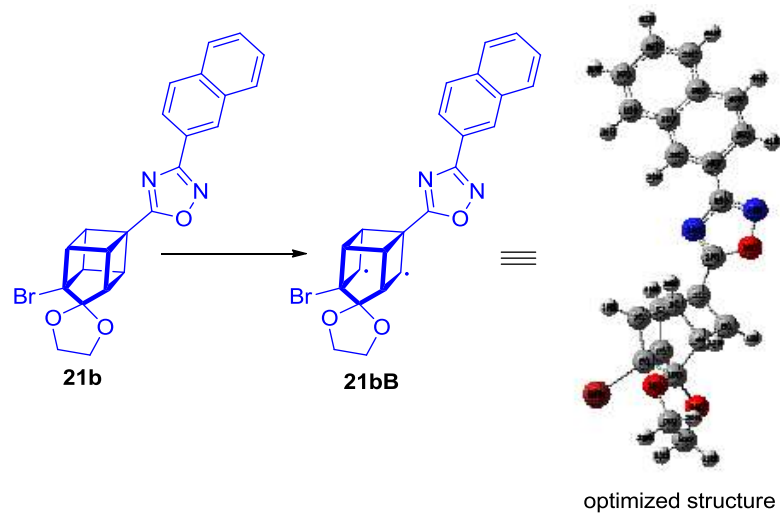

| Center | Atomic | Coordinates (Angstroms) |           |           |
|--------|--------|-------------------------|-----------|-----------|
| Number | Symbol | X                       | Y         | Z         |
| 1      | C      | 1.164179                | -0.132806 | -0.170195 |
| 2      | C      | 2.516006                | 0.291058  | 0.552784  |
| 3      | C      | 2.498284                | 1.533436  | -0.274692 |
| 4      | C      | 1.124644                | 1.285519  | -0.827851 |
| 5      | C      | -0.121537               | 1.427293  | 1.271543  |
| 6      | C      | 1.034426                | 1.716995  | 2.155311  |
| 7      | C      | 0.377280                | -0.047376 | 1.158771  |
| 8      | C      | 1.661519                | 0.385666  | 1.943265  |
| 9      | H      | 3.161771                | 2.387245  | -0.321150 |
| 10     | H      | 1.356105                | 2.637164  | 2.625512  |
| 11     | H      | 1.013049                | 1.351652  | -1.913616 |
| 12     | H      | 2.112136                | -0.177853 | 2.759527  |
| 13     | H      | -0.275724               | -0.853831 | 1.476484  |
| 14     | H      | 1.100931                | -1.018325 | -0.796862 |
| 15     | C      | 5.191362                | -1.999793 | 1.034785  |
| 16     | N      | 5.674930                | -1.350401 | 0.002317  |
| 17     | C      | -0.066633               | 2.043941  | -0.161819 |
| 18     | C      | -1.714401               | 2.967478  | -1.489874 |
| 19     | C      | -1.089345               | 4.056586  | -0.625357 |
| 20     | H      | -1.356668               | 3.012881  | -2.525134 |
| 21     | H      | -2.804660               | 2.966293  | -1.477528 |
| 22     | H      | -0.826512               | 4.959663  | -1.176860 |
| 23     | H      | -1.718535               | 4.311211  | 0.231768  |
| 24     | O      | 0.127626                | 3.439197  | -0.181822 |
| 25     | O      | -1.260072               | 1.762793  | -0.864037 |
| 26     | Br     | -1.890678               | 1.748888  | 2.173154  |
| 27     | C      | 3.712124                | -0.567432 | 0.629847  |
| 28     | O      | 4.691903                | -0.389976 | -0.275447 |
| 29     | N      | 3.962112                | -1.534715 | 1.460985  |



|    |   |          |           |          |
|----|---|----------|-----------|----------|
| 30 | C | 5.324168 | -3.770319 | 2.744434 |
| 31 | C | 5.983665 | -4.853346 | 3.376855 |
| 32 | C | 5.898047 | -3.115439 | 1.674347 |
| 33 | C | 5.410793 | -5.543408 | 4.477595 |
| 34 | C | 7.264535 | -5.265596 | 2.891919 |
| 35 | C | 7.172842 | -3.527059 | 1.193583 |
| 36 | H | 4.353492 | -3.452429 | 3.106107 |
| 37 | C | 6.072880 | -6.591416 | 5.071551 |
| 38 | H | 4.438768 | -5.229428 | 4.843199 |
| 39 | C | 7.921375 | -6.349843 | 3.527079 |
| 40 | C | 7.831279 | -4.570482 | 1.788851 |
| 41 | H | 7.612164 | -3.003768 | 0.353633 |
| 42 | C | 7.339988 | -6.998146 | 4.591764 |
| 43 | H | 5.625969 | -7.111394 | 5.911304 |
| 44 | H | 8.893322 | -6.661824 | 3.159288 |
| 45 | H | 8.803263 | -4.880132 | 1.419441 |
| 46 | H | 7.852263 | -7.826154 | 5.068749 |

---

**Table S46.** Atomic coordinates for optimized structure of biradical **24A** obtained using the B3LYP/6-311++G(d,p) level of theory

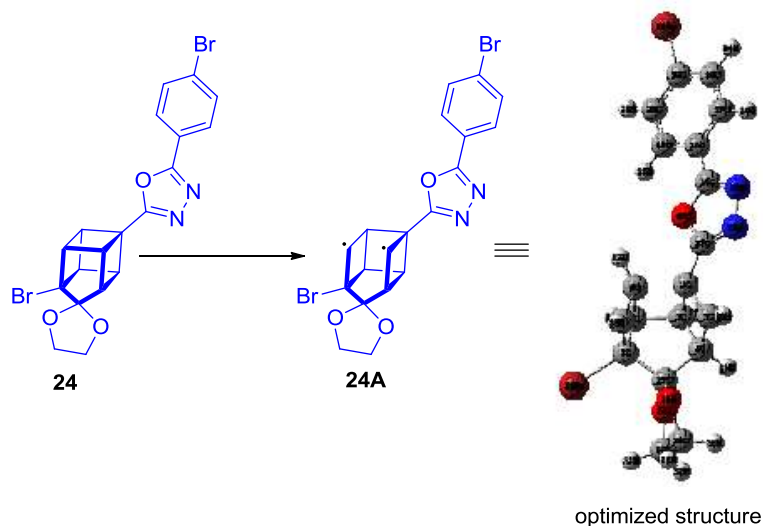

| Center Number | Atomic Symbol | Coordinates (Angstroms) |           |           |
|---------------|---------------|-------------------------|-----------|-----------|
|               |               | X                       | Y         | Z         |
| 1             | C             | 1.450518                | 0.213715  | -0.809605 |
| 2             | C             | 2.219272                | -0.536409 | 0.222617  |
| 3             | C             | 2.509770                | 0.849015  | 0.936116  |
| 4             | C             | 1.524502                | 1.522365  | -0.076185 |
| 5             | C             | 0.211853                | 0.879285  | 1.882503  |
| 6             | C             | 1.680289                | 0.442793  | 2.177343  |
| 7             | C             | -0.085604               | -0.512885 | 1.463928  |
| 8             | C             | 1.330647                | -0.948986 | 1.551643  |
| 9             | H             | 3.515894                | 1.244543  | 1.048839  |
| 10            | H             | 2.074671                | 0.566734  | 3.180930  |
| 11            | H             | 1.880689                | 2.385545  | -0.644429 |
| 12            | H             | 1.606068                | -1.913702 | 1.979030  |

|    |    |           |           |           |
|----|----|-----------|-----------|-----------|
| 13 | H  | -0.990837 | -0.959946 | 1.074569  |
| 14 | H  | 0.922045  | -0.106335 | -1.697124 |
| 15 | C  | 4.837989  | -2.910709 | 0.029912  |
| 16 | C  | 5.860651  | -3.703230 | 0.699471  |
| 17 | C  | 6.664648  | -4.567861 | -0.057140 |
| 18 | C  | 6.056171  | -3.616935 | 2.083325  |
| 19 | C  | 7.646924  | -5.332608 | 0.558000  |
| 20 | H  | 6.511998  | -4.632724 | -1.127197 |
| 21 | C  | 7.038458  | -4.380540 | 2.705869  |
| 22 | H  | 5.441340  | -2.951496 | 2.676244  |
| 23 | C  | 7.825705  | -5.232570 | 1.936995  |
| 24 | H  | 8.267023  | -5.999172 | -0.027014 |
| 25 | H  | 7.188206  | -4.312270 | 3.775390  |
| 26 | N  | 4.545648  | -2.869646 | -1.232614 |
| 27 | C  | 0.267356  | 1.949836  | 0.751740  |
| 28 | C  | -1.270296 | 3.353830  | -0.222942 |
| 29 | 6  | -0.642787 | 4.066416  | 0.970115  |
| 30 | H  | -0.840179 | 3.689758  | -1.173657 |
| 31 | H  | -2.356656 | 3.431628  | -0.264402 |
| 32 | H  | -0.295202 | 5.075487  | 0.745569  |
| 33 | H  | -1.310827 | 4.085135  | 1.835163  |
| 34 | O  | 0.505116  | 3.253036  | 1.248976  |
| 35 | O  | -0.932439 | 1.982674  | 0.016452  |
| 36 | Br | -0.902268 | 1.487165  | 3.441116  |
| 37 | C  | 3.234454  | -1.513121 | -0.189147 |
| 38 | Br | 9.179235  | -6.284507 | 2.787609  |
| 39 | N  | 3.503484  | -1.959625 | -1.374685 |
| 40 | O  | 4.043055  | -2.075325 | 0.762912  |

---

**Table S47.** Atomic coordinates for optimized structure of biradical **24B** obtained using the B3LYP/6-311++G(d,p) level of theory

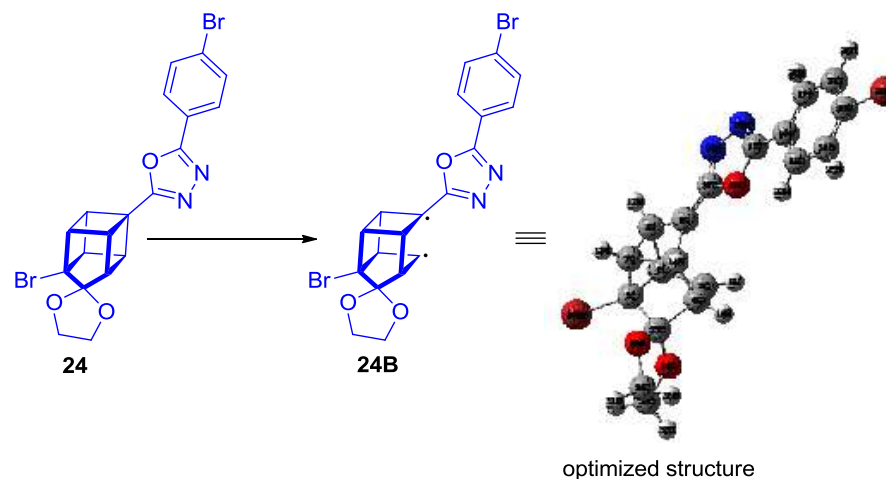

| Center Number | Atomic Symbol | Coordinates (Angstroms) |           |           |
|---------------|---------------|-------------------------|-----------|-----------|
|               |               | X                       | Y         | Z         |
| 1             | C             | 1.689199                | 0.013400  | 0.392865  |
| 2             | C             | 1.601057                | -1.279922 | 1.166240  |
| 3             | C             | 1.410222                | 0.818296  | 2.706472  |
| 4             | C             | 1.915741                | 1.250690  | 1.365419  |
| 5             | C             | -0.356381               | 1.129055  | 1.135394  |
| 6             | C             | 0.038901                | 0.305252  | 2.426529  |
| 7             | C             | 0.097668                | -0.060788 | 0.290087  |
| 8             | C             | 0.168677                | -1.033826 | 1.511591  |
| 9             | H             | 1.976397                | 0.694477  | 3.617324  |
| 10            | H             | -0.666748               | 0.248787  | 3.250797  |
| 11            | H             | 2.908404                | 1.693143  | 1.316966  |
| 12            | H             | -0.523018               | -1.844117 | 1.726244  |
| 13            | H             | -0.339648               | -0.309574 | -0.672542 |
| 14            | H             | 2.276599                | 0.064456  | -0.521555 |

|    |    |           |           |           |
|----|----|-----------|-----------|-----------|
| 15 | C  | 4.175075  | -3.606263 | 1.112280  |
| 16 | C  | 5.512363  | -4.004905 | 0.715989  |
| 17 | C  | 5.993717  | -5.271832 | 1.083354  |
| 18 | C  | 6.334842  | -3.147011 | -0.028086 |
| 19 | C  | 7.270561  | -5.672356 | 0.715575  |
| 20 | H  | 5.357608  | -5.933832 | 1.657355  |
| 21 | C  | 7.615028  | -3.543301 | -0.399283 |
| 22 | H  | 5.972454  | -2.168312 | -0.316260 |
| 23 | C  | 8.072627  | -4.803273 | -0.023816 |
| 24 | H  | 7.640231  | -6.648969 | 0.999646  |
| 25 | H  | 8.248221  | -2.879438 | -0.973125 |
| 26 | N  | 3.301571  | -4.295289 | 1.800409  |
| 27 | C  | 0.748152  | 2.195030  | 0.934926  |
| 28 | C  | 0.990227  | 4.039968  | -0.425920 |
| 29 | C  | 0.381133  | 4.466635  | 0.903297  |
| 30 | H  | 2.058580  | 4.279454  | -0.480522 |
| 31 | H  | 0.477897  | 4.443273  | -1.299584 |
| 32 | H  | 0.849859  | 5.346533  | 1.344437  |
| 33 | H  | -0.699681 | 4.617764  | 0.828217  |
| 34 | O  | 0.671877  | 3.342332  | 1.744705  |
| 35 | O  | 0.800859  | 2.620983  | -0.412651 |
| 36 | Br | -2.200724 | 1.723514  | 0.966213  |
| 37 | C  | 2.428609  | -2.372311 | 1.314049  |
| 38 | Br | 9.834534  | -5.351721 | -0.529973 |
| 39 | N  | 2.183422  | -3.528609 | 1.937659  |
| 40 | O  | 3.700474  | -2.379033 | 0.765509  |

---

**Table S48.** Atomic coordinates for optimized structure of biradical **25A** obtained using the B3LYP/6-311++G(d,p) level of theory

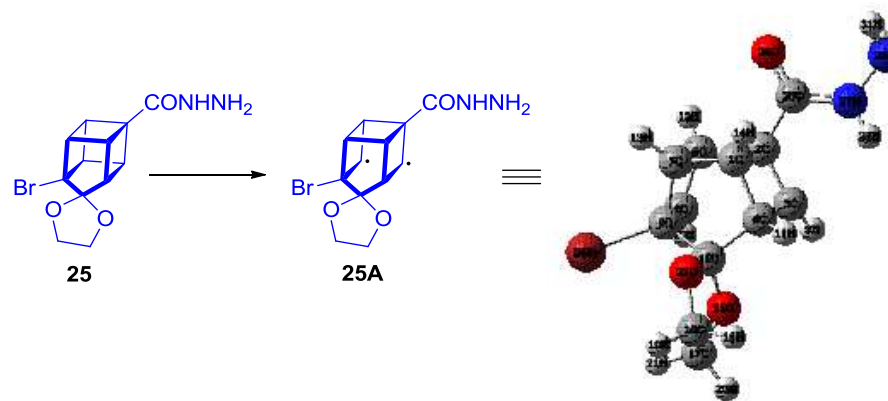

| optimized structure |        |                         |           |           |  |
|---------------------|--------|-------------------------|-----------|-----------|--|
| Center              | Atomic | Coordinates (Angstroms) |           |           |  |
| Number              | Symbol | X                       | Y         | Z         |  |
| 1                   | C      | -0.008852               | -0.839144 | -0.067484 |  |
| 2                   | C      | 1.545136                | -1.089873 | 0.086650  |  |
| 3                   | C      | 1.773786                | 0.239216  | -0.558925 |  |
| 4                   | C      | 0.316669                | 0.612903  | -0.549346 |  |
| 5                   | C      | 0.023299                | 0.708271  | 1.876300  |  |
| 6                   | C      | 1.419057                | 0.367528  | 2.247480  |  |
| 7                   | C      | -0.194913               | -0.781718 | 1.467252  |  |
| 8                   | C      | 1.336141                | -1.013758 | 1.704179  |  |
| 9                   | H      | 2.661629                | 0.856702  | -0.646809 |  |
| 10                  | H      | 2.222094                | 0.984168  | 2.630310  |  |
| 11                  | H      | -0.114771               | 0.959088  | -1.492706 |  |
| 12                  | H      | 1.759824                | -1.873255 | 2.222577  |  |
| 13                  | H      | -0.969514               | -1.359814 | 1.960662  |  |
| 14                  | H      | -0.642970               | -1.480663 | -0.674028 |  |
| 15                  | C      | -0.158039               | 1.571970  | 0.586951  |  |

|    |    |           |           |           |
|----|----|-----------|-----------|-----------|
| 16 | C  | -1.623444 | 3.296135  | 0.116095  |
| 17 | C  | -0.352329 | 3.861786  | 0.739344  |
| 18 | H  | -1.657746 | 3.464903  | -0.966610 |
| 19 | H  | -2.540734 | 3.666611  | 0.574789  |
| 20 | H  | 0.052265  | 4.724437  | 0.209428  |
| 21 | H  | -0.487620 | 4.100405  | 1.797589  |
| 22 | O  | -1.520003 | 1.895642  | 0.392354  |
| 23 | O  | 0.574033  | 2.776119  | 0.589590  |
| 24 | Br | -1.044281 | 1.418612  | 3.429129  |
| 25 | C  | 2.207587  | -2.369225 | -0.368587 |
| 26 | O  | 2.061151  | -3.434935 | 0.212925  |
| 27 | N  | 2.971039  | -2.249866 | -1.495348 |
| 28 | H  | 2.947007  | -1.394744 | -2.030614 |
| 29 | N  | 3.549413  | -3.357124 | -2.140290 |
| 30 | H  | 4.330951  | -3.683768 | -1.577000 |
| 31 | H  | 2.866474  | -4.112144 | -2.146700 |

**Table S49.** Atomic coordinates for optimized structure of biradical **25B** obtained using the B3LYP/6-311++G(d,p) level of theory

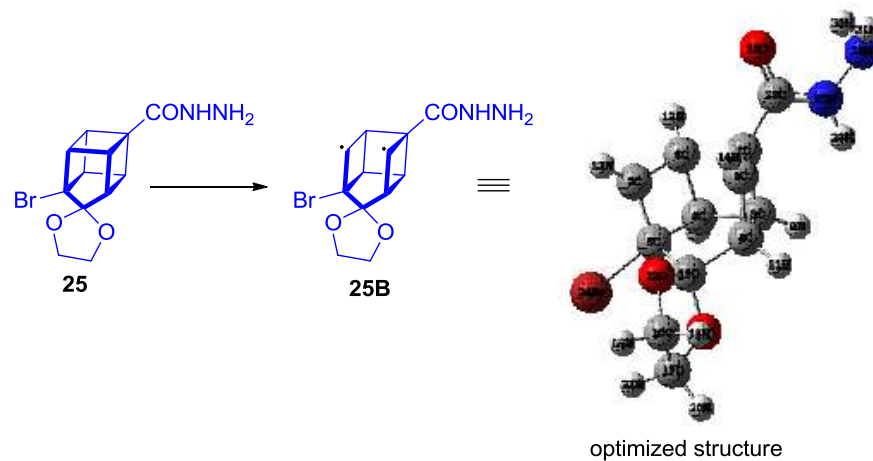

| Center | Atomic | Coordinates (Angstroms) |           |           |
|--------|--------|-------------------------|-----------|-----------|
| Number | Symbol | X                       | Y         | Z         |
| 1      | C      | 0.033481                | -0.614195 | -0.697800 |
| 2      | C      | 1.255468                | -1.185053 | -0.058612 |
| 3      | C      | 1.881808                | 0.262263  | -0.072724 |
| 4      | C      | 0.497260                | 0.809352  | -0.560357 |
| 5      | C      | 0.484163                | 0.908136  | 1.881494  |
| 6      | C      | 1.870045                | 0.320688  | 1.475762  |
| 7      | C      | 0.001720                | -0.473372 | 2.124777  |
| 8      | C      | 1.230290                | -1.107008 | 1.578095  |
| 9      | H      | 2.781030                | 0.542584  | -0.618619 |
| 10     | H      | 2.752543                | 0.623022  | 2.030934  |
| 11     | H      | 0.473880                | 1.429577  | -1.460340 |
| 12     | H      | 1.682231                | -1.971485 | 2.065743  |
| 13     | H      | -0.966490               | -0.846116 | 2.431630  |
| 14     | H      | -0.928321               | -1.052924 | -0.930826 |
| 15     | C      | -0.094139               | 1.634643  | 0.628870  |
| 16     | C      | -1.921372               | 2.987690  | 0.267992  |
| 17     | C      | -0.735710               | 3.856513  | 0.672030  |
| 18     | H      | -2.101581               | 3.016813  | -0.813026 |
| 19     | H      | -2.843588               | 3.222769  | 0.799492  |
| 20     | H      | -0.579829               | 4.717809  | 0.021496  |
| 21     | H      | -0.800464               | 4.180214  | 1.714083  |
| 22     | O      | -1.501854               | 1.677328  | 0.664656  |
| 23     | O      | 0.373623                | 2.964174  | 0.499564  |
| 24     | Br     | 0.420249                | 2.065950  | 3.526633  |
| 25     | C      | 1.820414                | -2.482232 | -0.585404 |
| 26     | O      | 1.235039                | -3.544622 | -0.444428 |
| 27     | N      | 3.031144                | -2.388490 | -1.212217 |
| 28     | H      | 3.421056                | -1.489802 | -1.445747 |
| 29     | N      | 3.640377                | -3.486365 | -1.847894 |



|    |   |          |           |           |
|----|---|----------|-----------|-----------|
| 30 | H | 3.964260 | -4.130165 | -1.130168 |
| 31 | H | 2.925604 | -3.983233 | -2.375934 |

**Table S50.** Atomic coordinates for optimized structure of biradical **27A** obtained using the B3LYP/6-311++G(d,p) level of theory

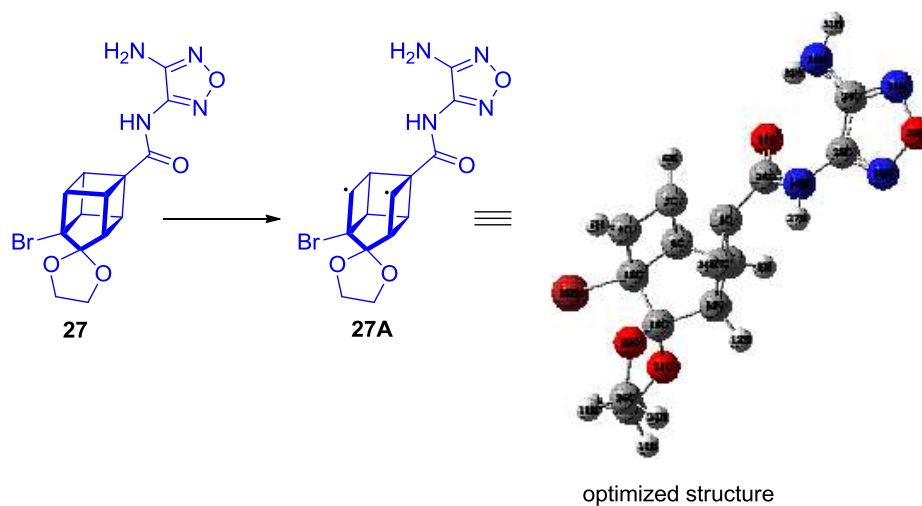

| Center Number | Atomic Symbol | Coordinates (Angstroms) |           |           |
|---------------|---------------|-------------------------|-----------|-----------|
|               |               | X                       | Y         | Z         |
| 1             | C             | -0.040833               | 0.729768  | -2.752018 |
| 2             | C             | 0.053167                | -0.351064 | -1.595568 |
| 3             | C             | 1.460228                | -0.847099 | -2.261811 |
| 4             | C             | 1.287236                | 0.241043  | -3.373775 |
| 5             | H             | -0.928910               | 0.843508  | -3.368117 |
| 6             | H             | 1.481851                | -1.921133 | -2.443122 |
| 7             | H             | 1.363513                | 0.026566  | -4.434627 |
| 8             | C             | 2.647371                | -0.099199 | -1.770521 |
| 9             | H             | 3.348067                | -0.238701 | -0.957660 |
| 10            | C             | 2.423031                | 1.053520  | -2.678471 |

|    |    |           |           |           |
|----|----|-----------|-----------|-----------|
| 11 | C  | 0.319688  | 1.825123  | -1.695620 |
| 12 | H  | -0.333699 | 2.697010  | -1.609591 |
| 13 | C  | 0.204234  | 0.775754  | -0.624890 |
| 14 | C  | 1.765901  | 2.317025  | -2.037773 |
| 15 | C  | 2.519105  | 4.450326  | -2.505916 |
| 16 | C  | 2.619216  | 4.193362  | -1.007160 |
| 17 | H  | 3.488450  | 4.364535  | -3.002996 |
| 18 | H  | 2.049530  | 5.400969  | -2.759850 |
| 19 | H  | 3.576998  | 4.478912  | -0.572335 |
| 20 | H  | 1.804521  | 4.673305  | -0.452936 |
| 21 | O  | 1.647610  | 3.396664  | -2.940957 |
| 22 | O  | 2.500264  | 2.767196  | -0.922864 |
| 23 | Br | 4.036056  | 1.507823  | -3.784321 |
| 24 | C  | -0.963088 | -1.452167 | -1.445246 |
| 25 | O  | -1.009734 | -2.408512 | -2.206941 |
| 26 | N  | -1.837908 | -1.280019 | -0.398660 |
| 27 | H  | -1.791905 | -0.395366 | 0.092623  |
| 28 | C  | -2.946349 | -2.073934 | -0.099372 |
| 29 | C  | -3.163391 | -3.494060 | -0.240303 |
| 30 | N  | -2.289705 | -4.440592 | -0.705926 |
| 31 | H  | -2.698713 | -5.355090 | -0.837228 |
| 32 | H  | -1.703249 | -4.113976 | -1.467575 |
| 33 | O  | -4.849596 | -2.563942 | 0.721475  |
| 34 | N  | -3.983289 | -1.540477 | 0.481192  |
| 35 | N  | -4.344387 | -3.766400 | 0.253901  |
| 36 | H  | 0.510003  | 0.791412  | 0.416282  |

---

**Table S51.** Atomic coordinates for optimized structure of biradical **27B** obtained using the B3LYP/6-311++G(d,p) level of theory

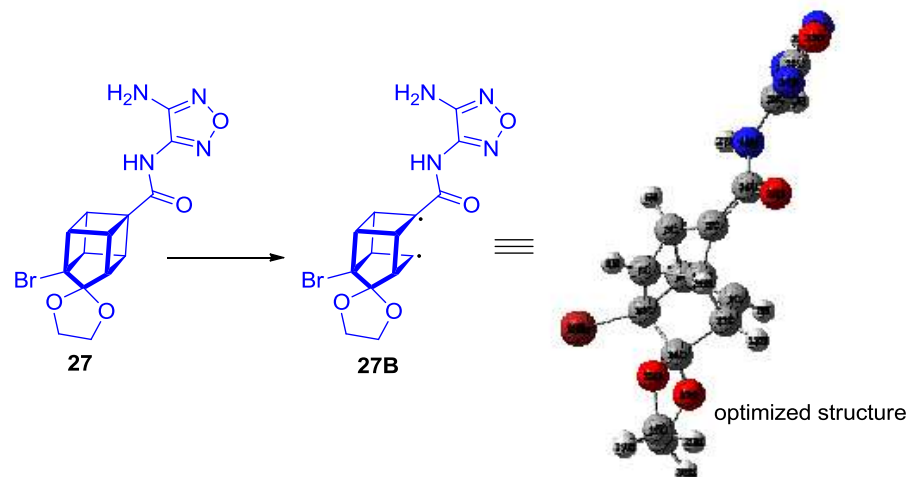

| Center Number | Atomic Symbol | Coordinates (Angstroms) |           |           |
|---------------|---------------|-------------------------|-----------|-----------|
|               |               | X                       | Y         | Z         |
| 1             | C             | 0.036774                | 1.768478  | -0.765704 |
| 2             | C             | 0.202859                | -0.703843 | -1.615051 |
| 3             | C             | -0.304611               | 0.179641  | -2.708954 |
| 4             | C             | -0.354184               | 1.723112  | -2.205895 |
| 5             | H             | -0.442947               | 2.357030  | 0.002847  |
| 6             | H             | -1.078133               | -0.119662 | -3.415452 |
| 7             | H             | -1.218093               | 2.301904  | -2.520210 |
| 8             | C             | 1.187284                | 0.468912  | -3.081560 |
| 9             | H             | 1.715297                | 0.000169  | -3.906467 |
| 10            | C             | 1.036330                | 1.981109  | -2.930328 |
| 11            | C             | 1.473089                | 1.342611  | -0.773246 |
| 12            | H             | 1.997800                | 1.318737  | 0.178753  |
| 13            | C             | 1.533603                | -0.009950 | -1.597349 |
| 14            | C             | 2.041768                | 2.366260  | -1.816702 |
| 15            | C             | 3.183316                | 4.361788  | -1.724026 |

|    |    |           |           |           |
|----|----|-----------|-----------|-----------|
| 16 | C  | 4.182806  | 3.214511  | -1.785210 |
| 17 | H  | 3.057644  | 4.845413  | -2.696965 |
| 18 | H  | 3.407931  | 5.107650  | -0.961617 |
| 19 | H  | 4.981335  | 3.358497  | -2.513009 |
| 20 | H  | 4.613363  | 2.993328  | -0.802058 |
| 21 | O  | 1.973891  | 3.689341  | -1.343151 |
| 22 | O  | 3.369227  | 2.121365  | -2.226619 |
| 23 | Br | 1.028057  | 3.068471  | -4.542276 |
| 24 | C  | -0.234349 | -1.885321 | -0.913478 |
| 25 | O  | 0.472567  | -2.490575 | -0.121626 |
| 26 | N  | -1.553455 | -2.280002 | -1.207132 |
| 27 | H  | -2.094220 | -1.696187 | -1.828736 |
| 28 | C  | -2.195098 | -3.415789 | -0.742612 |
| 29 | C  | -3.616176 | -3.519781 | -0.540402 |
| 30 | N  | -4.553373 | -2.534353 | -0.816328 |
| 31 | H  | -5.501141 | -2.827259 | -0.613605 |
| 32 | H  | -4.349016 | -1.642702 | -0.380902 |
| 33 | O  | -2.677929 | -5.378123 | -0.073222 |
| 34 | N  | -1.641222 | -4.559156 | -0.449529 |
| 35 | N  | -3.894682 | -4.723578 | -0.134054 |
| 36 | H  | 2.434971  | -0.589953 | -1.416801 |

---

**Table S52.** Atomic coordinates for optimized structure of biradical **28A** obtained using the B3LYP/6-311++G(d,p) level of theory

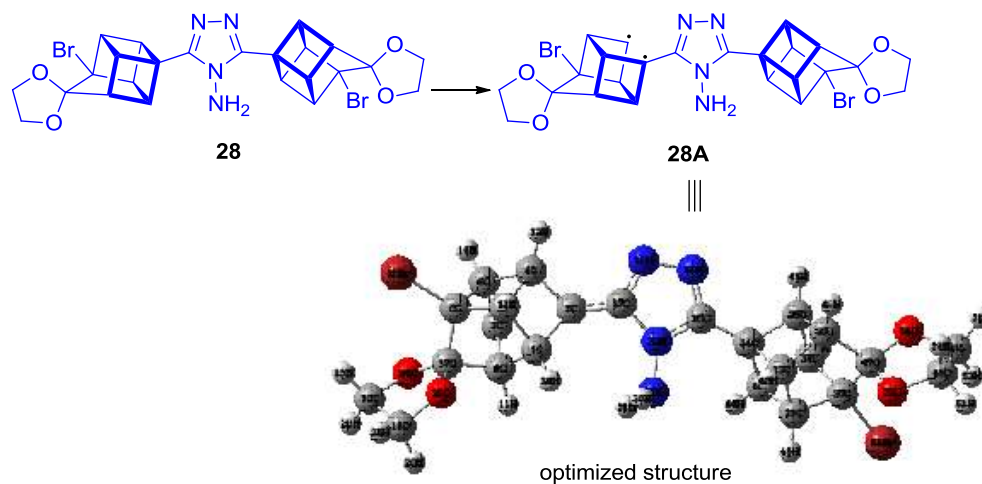

| Center Number | Atomic Symbol | Coordinates (Angstroms) |           |           |
|---------------|---------------|-------------------------|-----------|-----------|
|               |               | X                       | Y         | Z         |
| 1             | C             | 0.300350                | 1.615899  | 0.462168  |
| 2             | C             | 1.407049                | 1.216055  | 1.419196  |
| 3             | C             | -0.595906               | -0.474781 | 1.418408  |
| 4             | C             | -1.026877               | 0.782787  | 0.728970  |
| 5             | C             | 0.077009                | -0.417772 | -0.875348 |
| 6             | C             | 0.486889                | -1.007975 | 0.542716  |
| 7             | C             | 1.055169                | 0.729295  | -0.627381 |
| 8             | C             | 1.740506                | 0.023745  | 0.582310  |
| 9             | H             | -1.147735               | -1.019377 | 2.169740  |
| 10            | H             | 0.729345                | -2.063940 | 0.618233  |
| 11            | H             | -1.848615               | 1.345730  | 1.168878  |
| 12            | H             | 2.732042                | -0.420849 | 0.582588  |
| 13            | H             | 1.581429                | 1.243940  | -1.426521 |
| 14            | H             | 0.102340                | 2.659662  | 0.224017  |

|    |    |           |           |           |
|----|----|-----------|-----------|-----------|
| 15 | C  | 2.575589  | 2.988790  | 4.285555  |
| 16 | N  | 3.400779  | 1.958290  | 4.248830  |
| 17 | C  | -1.325484 | 0.214957  | -0.698255 |
| 18 | C  | -2.899115 | 1.013363  | -2.190554 |
| 19 | C  | -3.163542 | -0.458945 | -1.901253 |
| 20 | H  | -3.601730 | 1.666320  | -1.660100 |
| 21 | H  | -2.896988 | 1.261912  | -3.252256 |
| 22 | H  | -4.208936 | -0.690227 | -1.696738 |
| 23 | H  | -2.785459 | -1.106089 | -2.697647 |
| 24 | O  | -2.420496 | -0.667432 | -0.692807 |
| 25 | O  | -1.573208 | 1.201201  | -1.682802 |
| 26 | Br | 0.357518  | -1.536778 | -2.443581 |
| 27 | C  | 2.018522  | 1.730195  | 2.558163  |
| 28 | N  | 3.071507  | 1.172345  | 3.185546  |
| 29 | N  | 0.665004  | 3.824066  | 3.000570  |
| 30 | H  | 0.790553  | 4.234714  | 2.080380  |
| 31 | H  | -0.234874 | 3.352913  | 3.030323  |
| 32 | N  | 1.685887  | 2.899236  | 3.243940  |
| 33 | C  | 2.923224  | 5.588223  | 5.000628  |
| 34 | C  | 2.595408  | 4.066786  | 5.273459  |
| 35 | C  | 3.642140  | 4.141233  | 6.431791  |
| 36 | C  | 4.187635  | 5.500492  | 5.903372  |
| 37 | C  | 2.528637  | 6.115384  | 7.351239  |
| 38 | C  | 2.495381  | 4.565424  | 7.431927  |
| 39 | C  | 1.775435  | 6.006341  | 5.998182  |
| 40 | C  | 1.453523  | 4.500194  | 6.264869  |
| 41 | H  | 4.303861  | 3.322901  | 6.697808  |
| 42 | H  | 2.406723  | 4.058910  | 8.388539  |
| 43 | H  | 5.163990  | 5.505181  | 5.423432  |
| 44 | H  | 0.457233  | 4.070097  | 6.328803  |
| 45 | H  | 1.055965  | 6.761921  | 5.696888  |
| 46 | H  | 2.954637  | 6.046539  | 4.015413  |
| 47 | C  | 3.985926  | 6.520018  | 7.030691  |

|    |    |          |          |          |
|----|----|----------|----------|----------|
| 48 | C  | 5.225975 | 8.446115 | 7.268053 |
| 49 | C  | 5.353531 | 7.605727 | 8.532992 |
| 50 | H  | 6.111344 | 8.352808 | 6.627852 |
| 51 | H  | 5.016830 | 9.499803 | 7.454686 |
| 52 | H  | 6.378155 | 7.496466 | 8.889841 |
| 53 | H  | 4.715371 | 7.981925 | 9.338236 |
| 54 | O  | 4.897695 | 6.321006 | 8.092391 |
| 55 | O  | 4.084703 | 7.871154 | 6.624278 |
| 56 | Br | 1.637645 | 7.094685 | 8.786630 |

**Table S53.** Atomic coordinates for optimized structure of biradical **28B** obtained using the B3LYP/6-311++G(d,p) level of theory

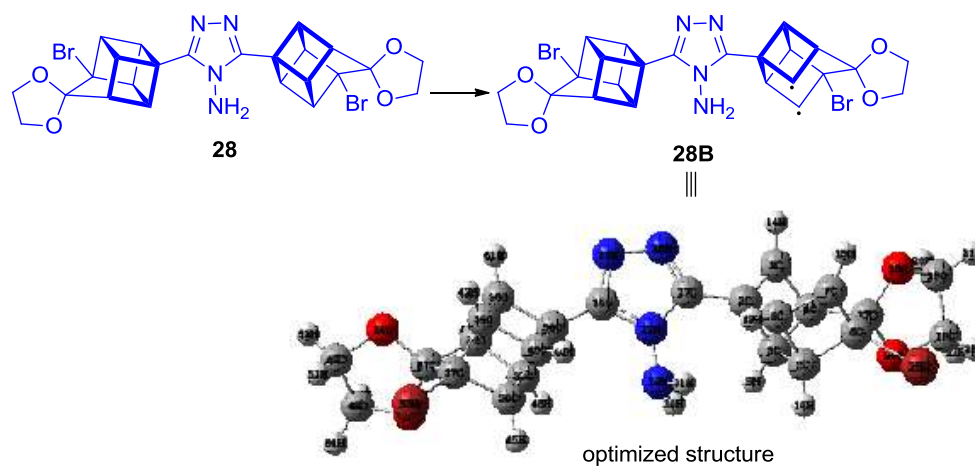

| Center Number | Atomic Symbol | Coordinates (Angstroms) |          |           |
|---------------|---------------|-------------------------|----------|-----------|
|               |               | X                       | Y        | Z         |
| 1             | C             | 1.288625                | 1.618801 | -0.336193 |
| 2             | C             | 1.002990                | 1.634450 | 1.126162  |
| 3             | C             | -0.502927               | 1.982524 | 0.770888  |
| 4             | C             | -0.151662               | 1.760352 | -0.737999 |

|    |    |           |           |           |
|----|----|-----------|-----------|-----------|
| 5  | C  | -0.945810 | -0.378863 | 0.128025  |
| 6  | C  | -1.004673 | 0.624823  | 1.320834  |
| 7  | C  | 0.356483  | -0.868044 | 0.641583  |
| 8  | C  | 0.450885  | 0.176422  | 1.689997  |
| 9  | H  | -0.987791 | 2.912504  | 1.061329  |
| 10 | H  | -1.847029 | 0.570032  | 2.004378  |
| 11 | H  | -0.389929 | 2.561393  | -1.442904 |
| 12 | H  | 0.807596  | -0.074969 | 2.691299  |
| 13 | H  | 1.045694  | -1.602446 | 0.246503  |
| 14 | H  | 2.199648  | 1.452890  | -0.893564 |
| 15 | C  | 2.761471  | 3.392376  | 3.777364  |
| 16 | N  | 3.677999  | 3.361979  | 2.838820  |
| 17 | C  | -0.901489 | 0.462111  | -1.182735 |
| 18 | C  | -1.029858 | -0.051947 | -3.421448 |
| 19 | C  | -2.438047 | 0.186132  | -2.889301 |
| 20 | H  | -0.649029 | 0.813814  | -3.975463 |
| 21 | H  | -0.932949 | -0.949625 | -4.032039 |
| 22 | H  | -3.034271 | 0.858820  | -3.506776 |
| 23 | H  | -2.978027 | -0.749763 | -2.724323 |
| 24 | O  | -2.188216 | 0.838597  | -1.636331 |
| 25 | O  | -0.270186 | -0.246192 | -2.223135 |
| 26 | Br | -2.355860 | -1.813936 | 0.069506  |
| 27 | C  | 1.911318  | 2.374817  | 2.024785  |
| 28 | N  | 3.140422  | 2.725766  | 1.736326  |
| 29 | N  | 0.432846  | 2.667317  | 4.055550  |
| 30 | H  | -0.322433 | 3.129395  | 3.559086  |
| 31 | H  | 0.193933  | 1.690047  | 4.189839  |
| 32 | N  | 1.619664  | 2.773677  | 3.316762  |
| 33 | C  | 2.110527  | 5.229912  | 5.670794  |
| 34 | C  | 2.903133  | 3.986556  | 5.108828  |
| 35 | C  | 4.203526  | 4.712982  | 5.584060  |
| 36 | C  | 3.428980  | 6.048481  | 5.786680  |
| 37 | C  | 3.252187  | 5.012894  | 7.817710  |



|    |    |          |          |          |
|----|----|----------|----------|----------|
| 38 | C  | 4.081974 | 3.997171 | 6.987233 |
| 39 | C  | 1.988980 | 4.509752 | 7.069070 |
| 40 | C  | 2.775142 | 3.280330 | 6.507518 |
| 41 | H  | 5.145811 | 4.672479 | 5.046631 |
| 42 | H  | 4.952098 | 3.507318 | 7.414391 |
| 43 | H  | 3.601589 | 6.851417 | 5.073075 |
| 44 | H  | 2.526112 | 2.237028 | 6.685456 |
| 45 | H  | 1.024450 | 4.469458 | 7.566446 |
| 46 | H  | 1.214975 | 5.648059 | 5.218435 |
| 47 | C  | 3.577328 | 6.420597 | 7.266452 |
| 48 | C  | 3.389992 | 8.565193 | 8.086942 |
| 49 | C  | 4.755701 | 8.000330 | 8.458900 |
| 50 | H  | 3.453463 | 9.257650 | 7.239059 |
| 51 | H  | 2.869841 | 9.046782 | 8.915492 |
| 52 | H  | 5.584402 | 8.681219 | 8.262037 |
| 53 | H  | 4.787260 | 7.663934 | 9.499457 |
| 54 | O  | 4.877685 | 6.883970 | 7.568899 |
| 55 | O  | 2.655655 | 7.393933 | 7.718245 |
| 56 | Br | 3.279288 | 4.799886 | 9.758652 |

---

**Table S54.** Atomic coordinates for optimized structure of biradical **28C** obtained using the B3LYP/6-311++G(d,p) level of theory

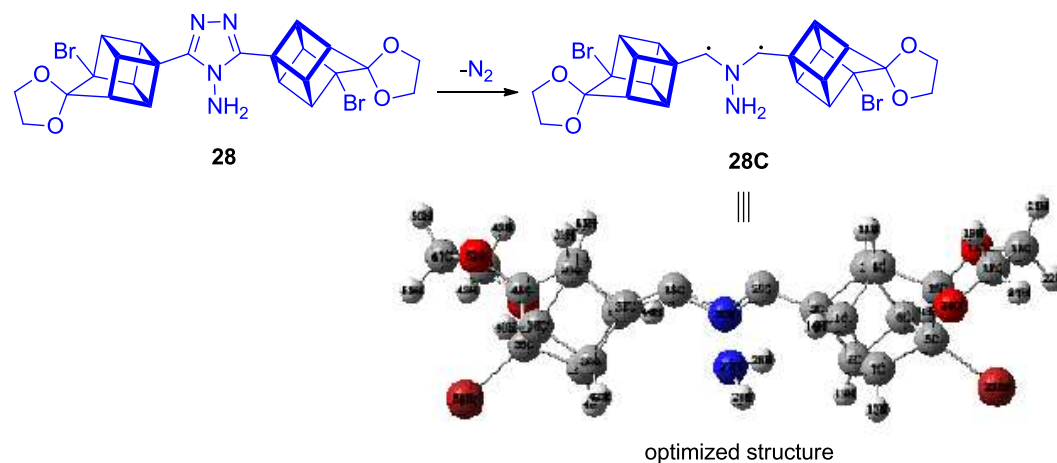

| Center Number | Atomic Symbol | Coordinates (Angstroms) |           |           |
|---------------|---------------|-------------------------|-----------|-----------|
|               |               | X                       | Y         | Z         |
| 1             | C             | 0.942534                | 0.750184  | 0.314306  |
| 2             | C             | 0.448452                | 1.784480  | 1.414695  |
| 3             | C             | -0.593498               | 2.244600  | 0.308031  |
| 4             | C             | 0.173259                | 1.491057  | -0.811642 |
| 5             | C             | -1.330537               | -0.053760 | -0.045038 |
| 6             | C             | -1.628542               | 1.183935  | 0.841280  |
| 7             | C             | -0.089766               | -0.313358 | 0.849618  |
| 8             | C             | -0.609030               | 0.698228  | 1.921850  |
| 9             | H             | -0.911201               | 3.277130  | 0.190628  |
| 10            | H             | -2.650780               | 1.496900  | 1.035306  |
| 11            | H             | 0.744520                | 2.076715  | -1.527546 |
| 12            | H             | -0.877000               | 0.428776  | 2.941661  |
| 13            | H             | 0.252235                | -1.325161 | 1.049606  |
| 14            | H             | 1.984054                | 0.461000  | 0.202281  |
| 15            | C             | 2.457695                | 3.856381  | 3.657984  |

|    |    |           |           |           |
|----|----|-----------|-----------|-----------|
| 16 | C  | -0.811318 | 0.473839  | -1.402766 |
| 17 | C  | -0.642434 | -0.402966 | -3.525535 |
| 18 | C  | -1.995603 | 0.281020  | -3.369375 |
| 19 | H  | 0.064382  | 0.218065  | -4.088566 |
| 20 | H  | -0.696554 | -1.395521 | -3.973599 |
| 21 | H  | -2.257596 | 0.937189  | -4.200025 |
| 22 | H  | -2.799479 | -0.440405 | -3.195120 |
| 23 | O  | -1.794240 | 1.094860  | -2.207258 |
| 24 | O  | -0.206645 | -0.547561 | -2.170599 |
| 25 | Br | -2.696097 | -1.448176 | -0.104103 |
| 26 | C  | 1.379101  | 2.748545  | 1.967674  |
| 27 | N  | 0.930262  | 2.172565  | 4.397076  |
| 28 | H  | -0.072320 | 2.297944  | 4.284073  |
| 29 | H  | 1.126220  | 1.187315  | 4.239774  |
| 30 | N  | 1.572137  | 2.909161  | 3.262563  |
| 31 | C  | 2.024564  | 4.916110  | 6.113682  |
| 32 | C  | 2.905978  | 4.266001  | 4.949033  |
| 33 | C  | 3.907474  | 5.457484  | 5.203658  |
| 34 | C  | 2.850389  | 6.228995  | 6.043581  |
| 35 | C  | 3.961641  | 4.973856  | 7.596574  |
| 36 | C  | 4.676160  | 4.590306  | 6.273452  |
| 37 | C  | 2.795345  | 4.039620  | 7.168915  |
| 38 | C  | 3.678282  | 3.410283  | 6.045958  |
| 39 | H  | 4.473280  | 5.941744  | 4.412351  |
| 40 | H  | 5.759096  | 4.522783  | 6.224726  |
| 41 | H  | 2.385142  | 7.105292  | 5.596872  |
| 42 | H  | 3.940230  | 2.359129  | 5.961848  |
| 43 | H  | 2.227169  | 3.478774  | 7.904736  |
| 44 | H  | 0.938486  | 4.917259  | 6.121526  |
| 45 | C  | 3.461831  | 6.427910  | 7.435623  |
| 46 | C  | 2.849231  | 8.100562  | 8.896446  |
| 47 | C  | 4.343933  | 8.198497  | 8.615349  |
| 48 | H  | 2.279655  | 8.848593  | 8.332139  |

|    |    |          |          |          |
|----|----|----------|----------|----------|
| 49 | H  | 2.592310 | 8.164580 | 9.954152 |
| 50 | H  | 4.686216 | 9.208459 | 8.387529 |
| 51 | H  | 4.939458 | 7.776776 | 9.430351 |
| 52 | O  | 4.484312 | 7.404279 | 7.430787 |
| 53 | O  | 2.529909 | 6.783644 | 8.437842 |
| 54 | Br | 4.886279 | 4.537621 | 9.259472 |

**Table S55.** Atomic coordinates for optimized structure of biradical **28D** obtained using the B3LYP/6-311++G(d,p) level of theory

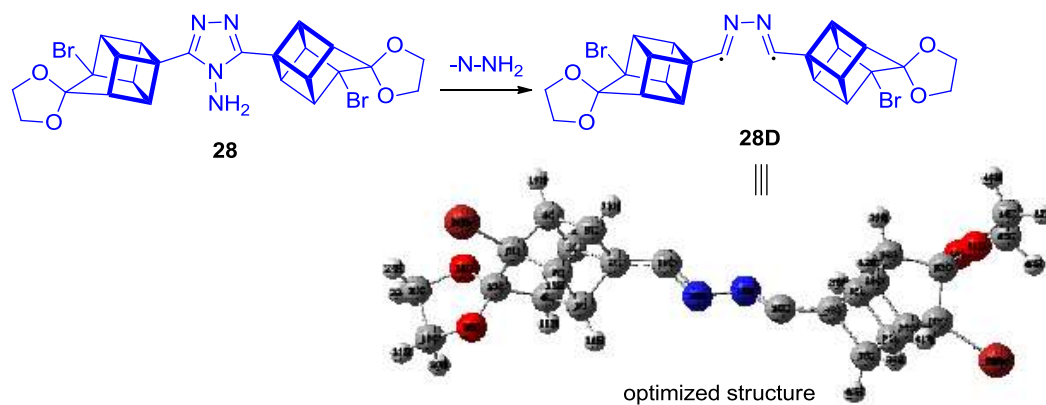

| Center Number | Atomic Symbol | Coordinates (Angstroms) |          |           |
|---------------|---------------|-------------------------|----------|-----------|
|               |               | X                       | Y        | Z         |
| 1             | C             | 0.047418                | 0.535800 | 0.558006  |
| 2             | C             | -0.303570               | 2.000578 | 1.057211  |
| 3             | C             | -0.517973               | 2.360238 | -0.465074 |
| 4             | C             | 0.178722                | 1.041024 | -0.906467 |
| 5             | C             | -2.025481               | 0.458407 | -0.734633 |
| 6             | C             | -2.039368               | 1.960581 | -0.344669 |
| 7             | C             | -1.475866               | 0.150870 | 0.685606  |

|    |    |           |           |           |
|----|----|-----------|-----------|-----------|
| 8  | C  | -1.821242 | 1.600998  | 1.161252  |
| 9  | H  | -0.255964 | 3.319908  | -0.902615 |
| 10 | H  | -2.801136 | 2.629921  | -0.733167 |
| 11 | H  | 1.176208  | 1.110986  | -1.335341 |
| 12 | H  | -2.487502 | 1.856745  | 1.980881  |
| 13 | H  | -1.752280 | -0.761121 | 1.206560  |
| 14 | H  | 0.799895  | -0.096484 | 1.020064  |
| 15 | C  | 2.415481  | 3.215421  | 4.695047  |
| 16 | N  | 1.977539  | 3.489757  | 3.561551  |
| 17 | C  | -0.856525 | 0.261163  | -1.726695 |
| 18 | C  | -0.312787 | -1.315660 | -3.312845 |
| 19 | C  | -1.152970 | -0.221234 | -3.960162 |
| 20 | H  | 0.753006  | -1.199780 | -3.542968 |
| 21 | H  | -0.634185 | -2.327334 | -3.561309 |
| 22 | H  | -0.750729 | 0.144533  | -4.905413 |
| 23 | H  | -2.193928 | -0.530791 | -4.091923 |
| 24 | O  | -1.065224 | 0.839439  | -2.999880 |
| 25 | O  | -0.545713 | -1.103525 | -1.917022 |
| 26 | Br | -3.735988 | -0.344894 | -1.219732 |
| 27 | C  | 0.424768  | 2.809678  | 2.005016  |
| 28 | N  | 1.364960  | 2.522395  | 2.770078  |
| 29 | C  | 2.527363  | 4.541434  | 7.017848  |
| 30 | C  | 3.133510  | 4.017454  | 5.655707  |
| 31 | C  | 3.710416  | 5.484147  | 5.466394  |
| 32 | C  | 2.797022  | 6.017329  | 6.604713  |
| 33 | C  | 4.707528  | 5.397871  | 7.698277  |
| 34 | C  | 5.021911  | 5.040603  | 6.219567  |
| 35 | C  | 3.845221  | 4.109431  | 7.769488  |
| 36 | C  | 4.443357  | 3.600203  | 6.417466  |
| 37 | H  | 3.786306  | 5.986626  | 4.506552  |
| 38 | H  | 5.989412  | 5.272033  | 5.783708  |
| 39 | H  | 1.944725  | 6.633919  | 6.327580  |
| 40 | H  | 4.991320  | 2.672869  | 6.272477  |

|    |    |          |          |           |
|----|----|----------|----------|-----------|
| 41 | H  | 3.773350 | 3.535582 | 8.688671  |
| 42 | H  | 1.565025 | 4.225145 | 7.411249  |
| 43 | C  | 3.731515 | 6.597649 | 7.674104  |
| 44 | C  | 3.146741 | 8.214152 | 9.210607  |
| 45 | C  | 4.344643 | 8.692367 | 8.398885  |
| 46 | H  | 2.215036 | 8.685971 | 8.877138  |
| 47 | H  | 3.260582 | 8.344861 | 10.287053 |
| 48 | H  | 4.255705 | 9.717625 | 8.038885  |
| 49 | H  | 5.283097 | 8.566599 | 8.946609  |
| 50 | O  | 4.309050 | 7.819101 | 7.262810  |
| 51 | O  | 3.118498 | 6.810574 | 8.930482  |
| 52 | Br | 6.227449 | 5.514061 | 8.917055  |

**Table S56.** Atomic coordinates for optimized structure of biradical **30aA** obtained using the B3LYP/6-311++G(d,p) level of theory

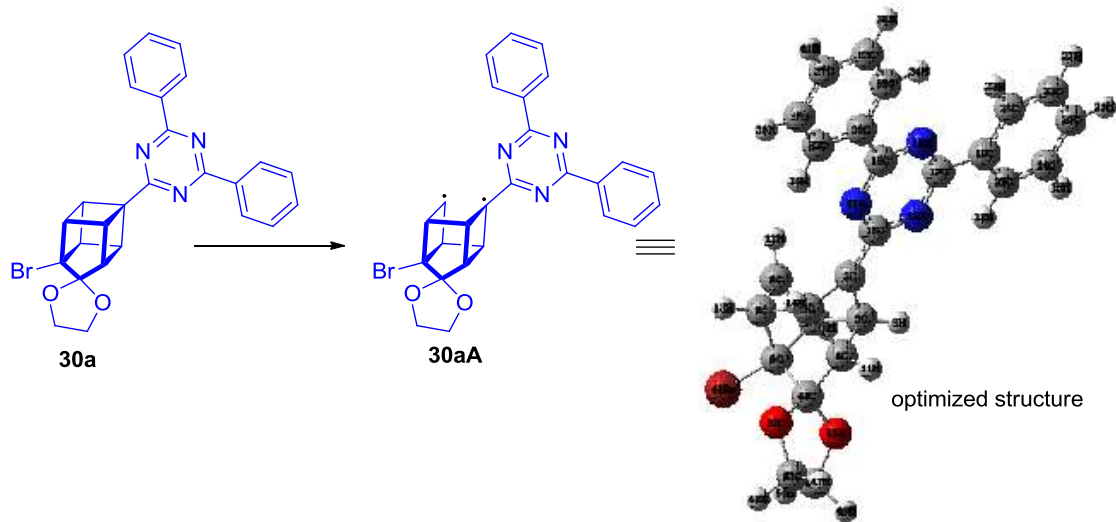

| Center | Atomic | Coordinates (Angstroms) |   |   |
|--------|--------|-------------------------|---|---|
| Number | Symbol | X                       | Y | Z |

|    |   |           |           |           |
|----|---|-----------|-----------|-----------|
| 1  | C | -0.058932 | -0.844023 | -0.014752 |
| 2  | C | 1.278993  | -1.027603 | -0.663851 |
| 3  | C | 1.599826  | 0.415954  | -0.427748 |
| 4  | C | 0.045638  | 0.628807  | -0.559688 |
| 5  | C | 0.373609  | 0.917566  | 1.652907  |
| 6  | C | 1.830769  | 0.616809  | 1.167400  |
| 7  | C | 0.186383  | -0.634259 | 1.577595  |
| 8  | C | 1.667470  | -0.722835 | 1.837853  |
| 9  | H | 2.313062  | 0.948932  | -1.049842 |
| 10 | H | 2.647169  | 1.298097  | 1.396773  |
| 11 | H | -0.337069 | 0.806491  | -1.562632 |
| 12 | H | 2.339854  | -1.558868 | 1.983592  |
| 13 | H | -0.554663 | -1.139097 | 2.193492  |
| 14 | H | -0.898730 | -1.490946 | -0.251452 |
| 15 | C | 1.876275  | -2.061900 | -1.417153 |
| 16 | C | 1.827308  | -4.187000 | -2.222888 |
| 17 | C | 3.597052  | -2.824082 | -2.692150 |
| 18 | N | 3.015104  | -4.028057 | -2.832742 |
| 19 | C | 4.909103  | -2.609471 | -3.355377 |
| 20 | C | 5.502274  | -3.632801 | -4.106704 |
| 21 | C | 5.569725  | -1.378737 | -3.237571 |
| 22 | C | 6.730691  | -3.428381 | -4.727439 |
| 23 | H | 4.989252  | -4.581047 | -4.194903 |
| 24 | C | 6.797723  | -1.177678 | -3.859142 |
| 25 | H | 5.108315  | -0.591783 | -2.655777 |
| 26 | C | 7.381913  | -2.201152 | -4.605782 |
| 27 | H | 7.180732  | -4.226709 | -5.306873 |
| 28 | H | 7.300783  | -0.222112 | -3.761661 |
| 29 | H | 8.339235  | -2.042891 | -5.090047 |
| 30 | C | 1.155381  | -5.505792 | -2.352063 |
| 31 | C | 1.750177  | -6.537416 | -3.090584 |
| 32 | C | -0.081934 | -5.734577 | -1.734097 |
| 33 | C | 1.119832  | -7.772209 | -3.208311 |

|    |    |           |           |           |
|----|----|-----------|-----------|-----------|
| 34 | H  | 2.705207  | -6.356508 | -3.565287 |
| 35 | C  | -0.709540 | -6.970084 | -1.853863 |
| 36 | H  | -0.536576 | -4.935423 | -1.163617 |
| 37 | C  | -0.111147 | -7.992413 | -2.590792 |
| 38 | H  | 1.588732  | -8.563766 | -3.782041 |
| 39 | H  | -1.666121 | -7.137336 | -1.371500 |
| 40 | H  | -0.601540 | -8.955268 | -2.682758 |
| 41 | N  | 1.214115  | -3.241389 | -1.510292 |
| 42 | N  | 3.075553  | -1.811911 | -1.998168 |
| 43 | Br | 0.203499  | 1.732611  | 3.418686  |
| 44 | C  | -0.412558 | 1.588387  | 0.528686  |
| 45 | C  | -2.329586 | 2.858316  | 0.400250  |
| 46 | C  | -1.127633 | 3.777940  | 0.583550  |
| 47 | H  | -2.677848 | 2.844820  | -0.639144 |
| 48 | H  | -3.164333 | 3.083814  | 1.064197  |
| 49 | H  | -1.113001 | 4.626502  | -0.101013 |
| 50 | H  | -1.034137 | 4.128467  | 1.615366  |
| 51 | O  | -0.029375 | 2.919057  | 0.248287  |
| 52 | O  | -1.804809 | 1.576571  | 0.763446  |

---



**Table S57.** Atomic coordinates for optimized structure of biradical **30aB** obtained using the B3LYP/6-311++G(d,p) level of theory

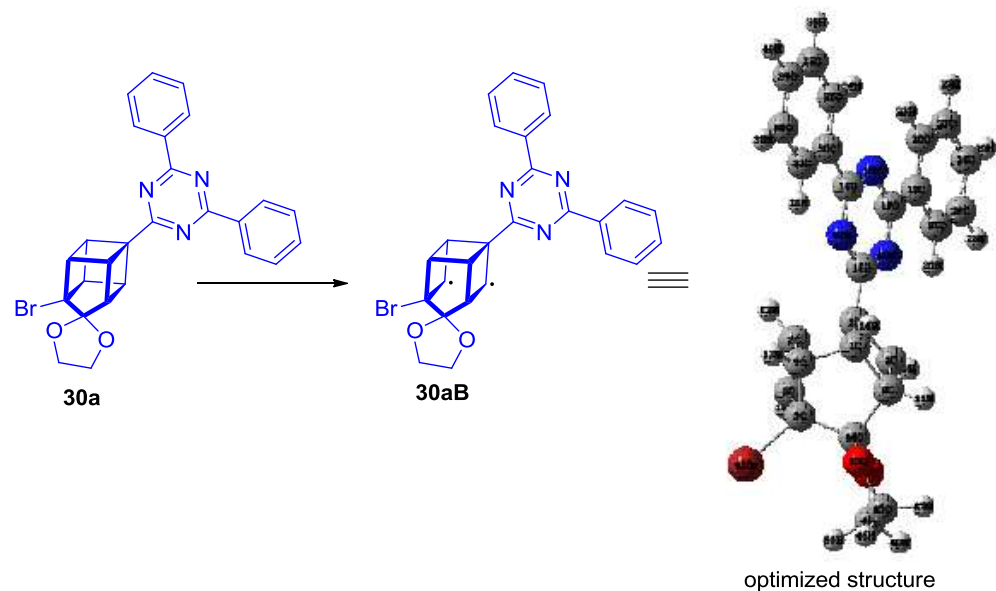

| Center Number | Atomic Symbol | Coordinates (Angstroms) |           |           |
|---------------|---------------|-------------------------|-----------|-----------|
|               |               | X                       | Y         | Z         |
| 1             | C             | -0.302574               | -0.689001 | -0.535631 |
| 2             | C             | 1.244560                | -0.898201 | -0.713238 |
| 3             | C             | 1.360261                | 0.531191  | -1.108060 |
| 4             | C             | -0.074540               | 0.842112  | -0.776892 |
| 5             | C             | 0.051050                | 0.470632  | 1.632052  |
| 6             | C             | 1.492116                | 0.121612  | 1.690543  |
| 7             | C             | -0.226704               | -0.925280 | 0.991608  |
| 8             | C             | 1.321515                | -1.139398 | 0.932354  |
| 9             | H             | 2.204018                | 1.157440  | -1.364216 |
| 10            | H             | 2.348420                | 0.693864  | 2.023150  |
| 11            | H             | -0.663162               | 1.337934  | -1.554349 |

|    |    |           |           |           |
|----|----|-----------|-----------|-----------|
| 12 | H  | 1.840396  | -2.056599 | 1.211141  |
| 13 | H  | -0.905888 | -1.609852 | 1.489668  |
| 14 | H  | -1.028921 | -1.227728 | -1.137759 |
| 15 | C  | 1.883505  | -1.997070 | -1.487002 |
| 16 | C  | 1.909290  | -4.168398 | -2.134148 |
| 17 | C  | 3.567591  | -2.759496 | -2.794266 |
| 18 | N  | 3.044355  | -3.991463 | -2.822690 |
| 19 | C  | 4.831199  | -2.518888 | -3.532126 |
| 20 | C  | 5.459000  | -3.561831 | -4.227316 |
| 21 | C  | 5.412762  | -1.243225 | -3.541284 |
| 22 | C  | 6.644905  | -3.332237 | -4.916727 |
| 23 | H  | 5.006778  | -4.544514 | -4.217584 |
| 24 | C  | 6.598765  | -1.017609 | -4.232047 |
| 25 | H  | 4.923520  | -0.442105 | -3.003296 |
| 26 | C  | 7.218036  | -2.060400 | -4.921159 |
| 27 | H  | 7.123363  | -4.145089 | -5.451346 |
| 28 | H  | 7.041081  | -0.027778 | -4.233677 |
| 29 | H  | 8.142573  | -1.882943 | -5.459384 |
| 30 | C  | 1.295794  | -5.518736 | -2.131838 |
| 31 | C  | 1.901518  | -6.575945 | -2.824889 |
| 32 | C  | 0.102389  | -5.753101 | -1.434345 |
| 33 | C  | 1.324386  | -7.841398 | -2.819334 |
| 34 | H  | 2.822049  | -6.390521 | -3.362017 |
| 35 | C  | -0.471902 | -7.019876 | -1.431346 |
| 36 | H  | -0.361107 | -4.933878 | -0.900795 |
| 37 | C  | 0.136896  | -8.067157 | -2.123023 |
| 38 | H  | 1.800322  | -8.652936 | -3.358168 |
| 39 | H  | -1.394799 | -7.191481 | -0.888916 |
| 40 | H  | -0.311777 | -9.054361 | -2.119397 |
| 41 | N  | 1.293628  | -3.196550 | -1.444425 |
| 42 | N  | 3.016594  | -1.724885 | -2.139436 |
| 43 | Br | -0.732293 | 0.838189  | 3.451582  |
| 44 | C  | -0.360181 | 1.549543  | 0.582129  |

|    |   |           |          |           |
|----|---|-----------|----------|-----------|
| 45 | C | -1.913501 | 3.256126 | 0.686927  |
| 46 | C | -0.566610 | 3.762964 | 1.190286  |
| 47 | H | -2.128017 | 3.609793 | -0.328520 |
| 48 | H | -2.749225 | 3.499015 | 1.344039  |
| 49 | H | -0.272464 | 4.724189 | 0.767727  |
| 50 | H | -0.527574 | 3.805774 | 2.282181  |
| 51 | O | 0.341364  | 2.767307 | 0.699296  |
| 52 | O | -1.741543 | 1.835862 | 0.688336  |

**Table S58.** Atomic coordinates for optimized structure of biradical **30bA** obtained using the B3LYP/6-311++G(d,p) level of theory

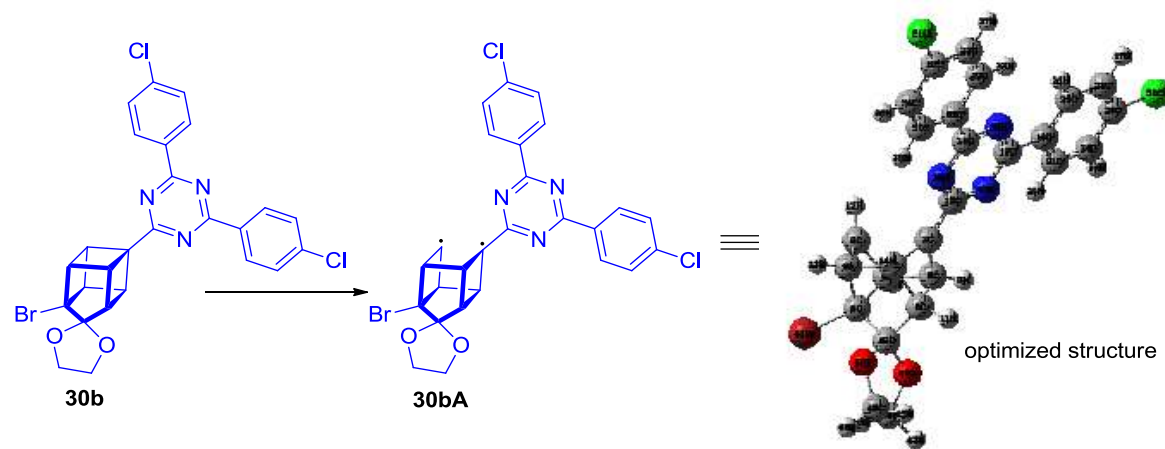

| Center Number | Atomic Symbol | Coordinates (Angstroms) |           |           |
|---------------|---------------|-------------------------|-----------|-----------|
|               |               | X                       | Y         | Z         |
| 1             | C             | -0.009095               | -0.869214 | 0.066417  |
| 2             | C             | 1.300402                | -1.036167 | -0.641759 |
| 3             | C             | 1.609927                | 0.413147  | -0.429145 |
| 4             | C             | 0.048016                | 0.600971  | -0.492895 |
| 5             | C             | 0.471646                | 0.911008  | 1.701167  |
| 6             | C             | 1.909965                | 0.629088  | 1.151856  |

|    |   |           |           |           |
|----|---|-----------|-----------|-----------|
| 7  | C | 0.305444  | -0.644082 | 1.644462  |
| 8  | C | 1.798008  | -0.707495 | 1.838445  |
| 9  | H | 2.285718  | 0.952084  | -1.086863 |
| 10 | H | 2.725347  | 1.324329  | 1.338910  |
| 11 | H | -0.382152 | 0.765659  | -1.478632 |
| 12 | H | 2.490205  | -1.530202 | 1.965870  |
| 13 | H | -0.399147 | -1.155686 | 2.296439  |
| 14 | H | -0.848408 | -1.530678 | -0.127842 |
| 15 | C | 1.876940  | -2.062680 | -1.420282 |
| 16 | C | 1.817226  | -4.184969 | -2.232969 |
| 17 | C | 3.554497  | -2.805807 | -2.762704 |
| 18 | N | 2.979589  | -4.015000 | -2.887528 |
| 19 | C | 4.838863  | -2.577318 | -3.470705 |
| 20 | C | 5.412923  | -3.587737 | -4.252455 |
| 21 | C | 5.497186  | -1.344824 | -3.366905 |
| 22 | C | 6.615455  | -3.377407 | -4.917565 |
| 23 | H | 4.906957  | -4.540246 | -4.333914 |
| 24 | C | 6.699918  | -1.122496 | -4.026552 |
| 25 | H | 5.055642  | -0.563580 | -2.762596 |
| 26 | C | 7.249025  | -2.143625 | -4.797990 |
| 27 | H | 7.058064  | -4.158793 | -5.521878 |
| 28 | H | 7.208367  | -0.170330 | -3.945458 |
| 29 | C | 1.150671  | -5.506422 | -2.344806 |
| 30 | C | 1.721043  | -6.530713 | -3.110992 |
| 31 | C | -0.060958 | -5.749034 | -1.684166 |
| 32 | C | 1.100165  | -7.769792 | -3.218928 |
| 33 | H | 2.656537  | -6.345916 | -3.621501 |
| 34 | C | -0.691454 | -6.983344 | -1.784474 |
| 35 | H | -0.502052 | -4.959150 | -1.090776 |
| 36 | C | -0.103521 | -7.984694 | -2.553272 |
| 37 | H | 1.541850  | -8.560776 | -3.811314 |
| 38 | H | -1.627241 | -7.170385 | -1.273555 |
| 39 | N | 1.224192  | -3.249621 | -1.491687 |

|    |    |           |           |           |
|----|----|-----------|-----------|-----------|
| 40 | N  | 3.050466  | -1.800226 | -2.048031 |
| 41 | Br | 0.370296  | 1.735074  | 3.467220  |
| 42 | C  | -0.375836 | 1.561188  | 0.609446  |
| 43 | C  | -2.317524 | 2.798980  | 0.562808  |
| 44 | C  | -1.123491 | 3.738747  | 0.684888  |
| 45 | H  | -2.713820 | 2.773509  | -0.458874 |
| 46 | H  | -3.123701 | 3.014578  | 1.264171  |
| 47 | H  | -1.154491 | 4.583197  | -0.004042 |
| 48 | H  | -0.987099 | 4.096541  | 1.709297  |
| 49 | O  | -0.028011 | 2.895130  | 0.302951  |
| 50 | O  | -1.755133 | 1.527446  | 0.907180  |
| 51 | Cl | -0.895047 | -9.547241 | -2.684975 |
| 52 | Cl | 8.768737  | -1.869646 | -5.635230 |

---

**Table S59.** Atomic coordinates for optimized structure of biradical **30bB** obtained using the B3LYP/6-311++G(d,p) level of theory

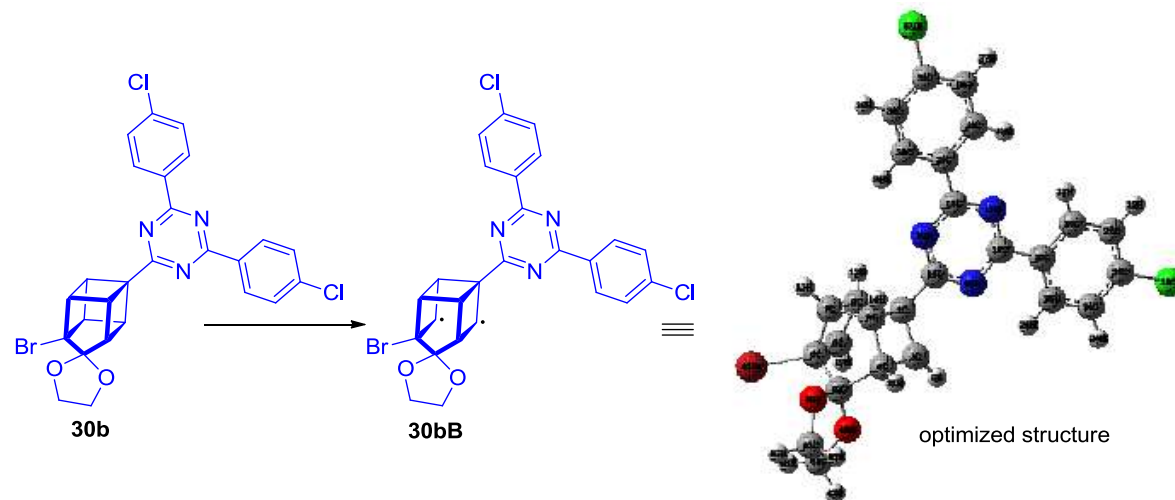

| Center Number | Atomic Symbol | Coordinates (Angstroms) |           |           |
|---------------|---------------|-------------------------|-----------|-----------|
|               |               | X                       | Y         | Z         |
| 1             | C             | -0.303457               | -0.689233 | -0.536666 |
| 2             | C             | 1.243410                | -0.899589 | -0.715280 |
| 3             | C             | 1.360705                | 0.530060  | -1.108645 |
| 4             | C             | -0.073755               | 0.841671  | -0.777120 |
| 5             | C             | 0.051875                | 0.468564  | 1.632172  |
| 6             | C             | 1.492793                | 0.117437  | 1.689948  |
| 7             | C             | -0.227529               | -0.926582 | 0.990387  |
| 8             | C             | 1.320286                | -1.142746 | 0.931411  |
| 9             | H             | 2.205860                | 1.156996  | -1.358522 |
| 10            | H             | 2.349897                | 0.686527  | 2.025760  |
| 11            | H             | -0.662017               | 1.338418  | -1.554147 |
| 12            | H             | 1.838345                | -2.060722 | 1.209269  |
| 13            | H             | -0.907561               | -1.610513 | 1.488169  |
| 14            | H             | -1.030776               | -1.226416 | -1.139049 |

|    |    |           |           |           |
|----|----|-----------|-----------|-----------|
| 15 | C  | 1.881573  | -1.997564 | -1.488773 |
| 16 | C  | 1.907007  | -4.168039 | -2.139740 |
| 17 | C  | 3.566446  | -2.761250 | -2.794766 |
| 18 | N  | 3.043256  | -3.993213 | -2.827017 |
| 19 | C  | 4.829442  | -2.519977 | -3.530400 |
| 20 | C  | 5.457521  | -3.558091 | -4.231220 |
| 21 | C  | 5.414738  | -1.246628 | -3.534618 |
| 22 | C  | 6.642933  | -3.334988 | -4.920901 |
| 23 | H  | 5.007716  | -4.541810 | -4.229584 |
| 24 | C  | 6.599898  | -1.011660 | -4.220948 |
| 25 | H  | 4.929964  | -0.444560 | -2.994146 |
| 26 | C  | 7.204447  | -2.060561 | -4.909220 |
| 27 | H  | 7.128348  | -4.136871 | -5.462101 |
| 28 | H  | 7.052014  | -0.028220 | -4.224402 |
| 29 | C  | 1.291463  | -5.515766 | -2.140884 |
| 30 | C  | 1.894950  | -6.575208 | -2.831166 |
| 31 | C  | 0.095096  | -5.750176 | -1.449687 |
| 32 | C  | 1.321241  | -7.840721 | -2.833921 |
| 33 | H  | 2.818275  | -6.396783 | -3.365644 |
| 34 | C  | -0.488249 | -7.011319 | -1.445759 |
| 35 | H  | -0.371931 | -4.933163 | -0.915969 |
| 36 | C  | 0.131774  | -8.047493 | -2.139617 |
| 37 | H  | 1.787800  | -8.659175 | -3.366894 |
| 38 | H  | -1.412336 | -7.192143 | -0.911953 |
| 39 | N  | 1.290978  | -3.197489 | -1.449819 |
| 40 | N  | 3.016633  | -1.727113 | -2.139681 |
| 41 | Br | -0.729544 | 0.834441  | 3.450782  |
| 42 | C  | -0.357989 | 1.548875  | 0.582584  |
| 43 | C  | -1.908497 | 3.257703  | 0.689320  |
| 44 | C  | -0.560353 | 3.762367  | 1.191442  |
| 45 | H  | -2.123932 | 3.612029  | -0.325595 |
| 46 | H  | -2.743073 | 3.501045  | 1.347623  |
| 47 | H  | -0.264872 | 4.722886  | 0.768372  |

|    |    |           |           |           |
|----|----|-----------|-----------|-----------|
| 48 | H  | -0.519956 | 3.805294  | 2.283217  |
| 49 | O  | 0.345789  | 2.764823  | 0.699788  |
| 50 | O  | -1.738410 | 1.836809  | 0.689461  |
| 51 | Cl | -0.599083 | -9.643342 | -2.139251 |
| 52 | Cl | 8.701956  | -1.771438 | -5.778329 |

**Table S60.** Atomic coordinates for optimized structure of biradical **30cA** obtained using the B3LYP/6-311++G(d,p) level of theory

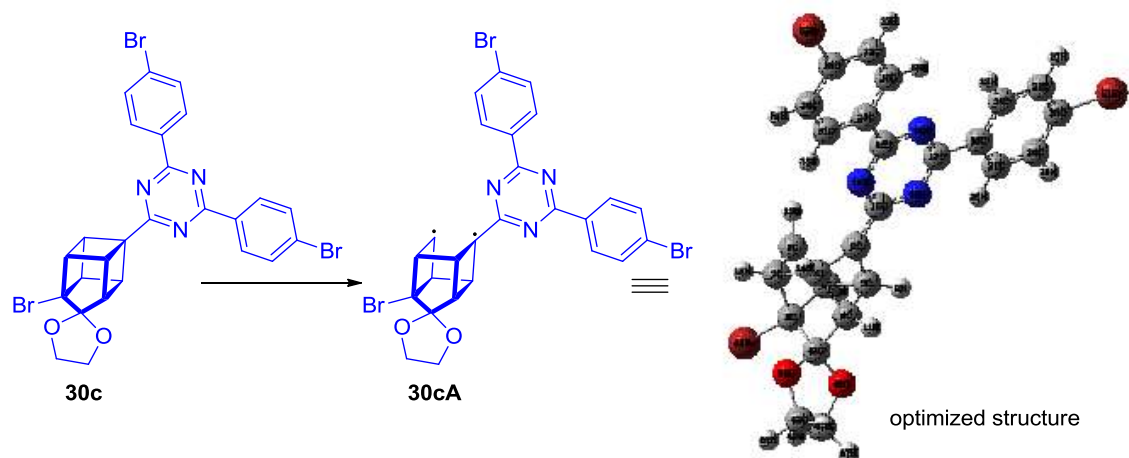

| Center Number | Atomic Symbol | Coordinates (Angstroms) |           |           |
|---------------|---------------|-------------------------|-----------|-----------|
|               |               | X                       | Y         | Z         |
| 1             | C             | -0.009748               | -0.868680 | 0.066086  |
| 2             | C             | 1.298923                | -1.035518 | -0.643584 |
| 3             | C             | 1.608738                | 0.413735  | -0.431217 |
| 4             | C             | 0.046750                | 0.601581  | -0.493121 |
| 5             | C             | 0.473046                | 0.911335  | 1.700507  |
| 6             | C             | 1.910706                | 0.629444  | 1.149459  |
| 7             | C             | 0.306715                | -0.643749 | 1.643805  |



|    |   |           |           |           |
|----|---|-----------|-----------|-----------|
| 8  | C | 1.799501  | -0.707197 | 1.836034  |
| 9  | H | 2.283783  | 0.952697  | -1.089675 |
| 10 | H | 2.726348  | 1.324627  | 1.335568  |
| 11 | H | -0.384593 | 0.766435  | -1.478313 |
| 12 | H | 2.491890  | -1.529790 | 1.963119  |
| 13 | H | -0.397137 | -1.155425 | 2.296518  |
| 14 | H | -0.849277 | -1.530134 | -0.127271 |
| 15 | C | 1.874996  | -2.061948 | -1.422401 |
| 16 | C | 1.815422  | -4.184307 | -2.234877 |
| 17 | C | 3.552411  | -2.805215 | -2.764935 |
| 18 | N | 2.977651  | -4.014455 | -2.889685 |
| 19 | C | 4.837582  | -2.577081 | -3.472169 |
| 20 | C | 5.414741  | -3.589580 | -4.248623 |
| 21 | C | 5.493541  | -1.343240 | -3.371843 |
| 22 | C | 6.619121  | -3.380352 | -4.912060 |
| 23 | H | 4.910732  | -4.543431 | -4.327541 |
| 24 | C | 6.697934  | -1.121191 | -4.029841 |
| 25 | H | 5.049740  | -0.560115 | -2.771497 |
| 26 | C | 7.250409  | -2.144902 | -4.795706 |
| 27 | H | 7.060624  | -4.166504 | -5.510696 |
| 28 | H | 7.200886  | -0.166335 | -3.948475 |
| 29 | C | 1.148936  | -5.506122 | -2.346535 |
| 30 | C | 1.717504  | -6.528845 | -3.115833 |
| 31 | C | -0.060326 | -5.750225 | -1.682485 |
| 32 | C | 1.097058  | -7.768836 | -3.223689 |
| 33 | H | 2.651272  | -6.343080 | -3.629304 |
| 34 | C | -0.690800 | -6.985324 | -1.782019 |
| 35 | H | -0.500362 | -4.961497 | -1.086627 |
| 36 | C | -0.104362 | -7.985246 | -2.554105 |
| 37 | H | 1.541056  | -8.555525 | -3.819758 |
| 38 | H | -1.624538 | -7.168938 | -1.266471 |
| 39 | N | 1.222535  | -3.249172 | -1.493443 |
| 40 | N | 3.048324  | -1.799525 | -2.050711 |

|    |    |           |           |           |
|----|----|-----------|-----------|-----------|
| 41 | Br | 0.373872  | 1.735092  | 3.466779  |
| 42 | C  | -0.375719 | 1.561701  | 0.609867  |
| 43 | C  | -2.317277 | 2.799900  | 0.566501  |
| 44 | C  | -1.122821 | 3.739338  | 0.687049  |
| 45 | H  | -2.715306 | 2.775028  | -0.454512 |
| 46 | H  | -3.122209 | 3.015331  | 1.269342  |
| 47 | H  | -1.154690 | 4.584033  | -0.001534 |
| 48 | H  | -0.984680 | 4.096727  | 1.711359  |
| 49 | O  | -0.028137 | 2.895583  | 0.303057  |
| 50 | O  | -1.754630 | 1.528002  | 0.909236  |
| 51 | Br | 8.910224  | -1.847838 | -5.704753 |
| 52 | Br | -0.966363 | -9.690006 | -2.696864 |

**Table S61.** Atomic coordinates for optimized structure of biradical **30cB** obtained using the B3LYP/6-311++G(d,p) level of theory

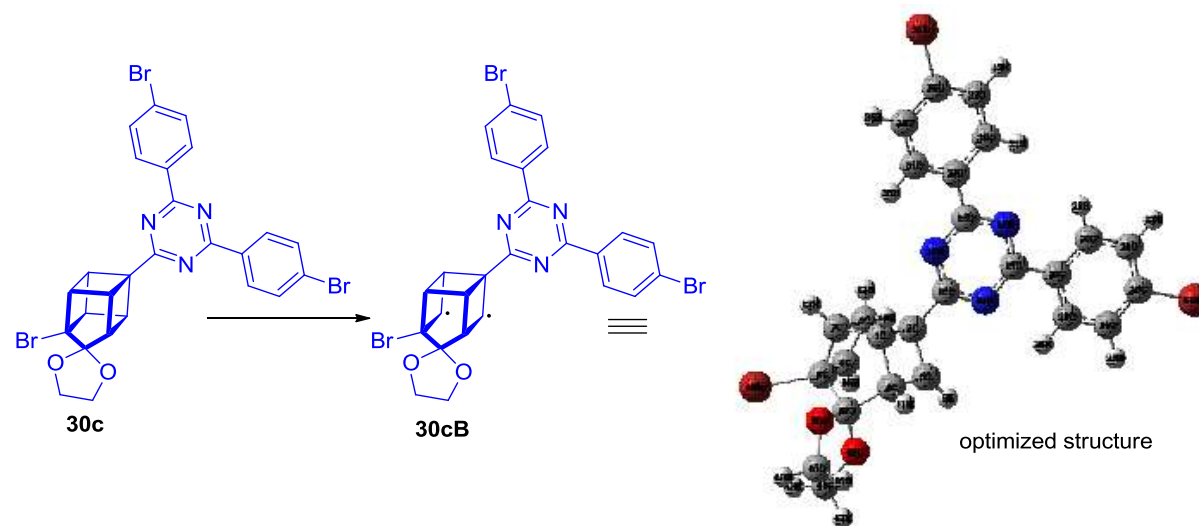

| Center | Atomic | Coordinates (Angstroms) |           |           |
|--------|--------|-------------------------|-----------|-----------|
| Number | Symbol | X                       | Y         | Z         |
| 1      | C      | -0.303698               | -0.689142 | -0.536551 |
| 2      | C      | 1.243039                | -0.899661 | -0.715932 |
| 3      | C      | 1.360399                | 0.530029  | -1.109106 |
| 4      | C      | -0.073864               | 0.841756  | -0.776848 |
| 5      | C      | 0.052810                | 0.468248  | 1.632340  |
| 6      | C      | 1.493713                | 0.116846  | 1.689402  |
| 7      | C      | -0.227116               | -0.926766 | 0.990441  |
| 8      | C      | 1.320633                | -1.143180 | 0.930785  |
| 9      | H      | 2.205601                | 1.156925  | -1.358936 |
| 10     | H      | 2.351081                | 0.685643  | 2.025036  |
| 11     | H      | -0.662383               | 1.338727  | -1.553531 |
| 12     | H      | 1.838737                | -2.061242 | 1.208293  |
| 13     | H      | -0.907055               | -1.610675 | 1.488376  |
| 14     | H      | -1.031421               | -1.226107 | -1.138643 |
| 15     | C      | 1.880810                | -1.997489 | -1.489783 |
| 16     | C      | 1.906118                | -4.167831 | -2.141251 |
| 17     | C      | 3.565771                | -2.761360 | -2.795590 |
| 18     | N      | 3.042595                | -3.993307 | -2.828162 |
| 19     | C      | 4.829532                | -2.520048 | -3.530461 |
| 20     | C      | 5.459511                | -3.558562 | -4.228628 |
| 21     | C      | 5.413043                | -1.246088 | -3.536363 |
| 22     | C      | 6.645982                | -3.335433 | -4.917802 |
| 23     | H      | 5.011203                | -4.543055 | -4.225875 |
| 24     | C      | 6.599070                | -1.010364 | -4.222167 |
| 25     | H      | 4.926868                | -0.443402 | -2.997920 |
| 26     | C      | 7.205643                | -2.059997 | -4.907829 |
| 27     | H      | 7.129439                | -4.140738 | -5.455370 |
| 28     | H      | 7.045908                | -0.024706 | -4.224227 |
| 29     | C      | 1.289729                | -5.515475 | -2.143026 |

|    |    |           |           |           |
|----|----|-----------|-----------|-----------|
| 30 | C  | 1.891834  | -6.574612 | -2.834625 |
| 31 | C  | 0.093900  | -5.749431 | -1.451106 |
| 32 | C  | 1.317055  | -7.840373 | -2.838289 |
| 33 | H  | 2.814912  | -6.396764 | -3.369897 |
| 34 | C  | -0.490936 | -7.010541 | -1.447585 |
| 35 | H  | -0.372358 | -4.932630 | -0.916243 |
| 36 | C  | 0.127893  | -8.046595 | -2.143013 |
| 37 | H  | 1.786056  | -8.655492 | -3.373901 |
| 38 | H  | -1.414677 | -7.186201 | -0.911781 |
| 39 | N  | 1.290170  | -3.197436 | -1.451232 |
| 40 | N  | 3.016061  | -1.727281 | -2.140592 |
| 41 | Br | -0.727596 | 0.833855  | 3.451306  |
| 42 | C  | -0.357386 | 1.548792  | 0.583102  |
| 43 | C  | -1.907544 | 3.257846  | 0.690896  |
| 44 | C  | -0.559075 | 3.762203  | 1.192434  |
| 45 | H  | -2.123454 | 3.612394  | -0.323840 |
| 46 | H  | -2.741751 | 3.501154  | 1.349671  |
| 47 | H  | -0.263617 | 4.722729  | 0.769373  |
| 48 | H  | -0.518107 | 3.804942  | 2.284197  |
| 49 | O  | 0.346650  | 2.764574  | 0.700143  |
| 50 | O  | -1.737668 | 1.836909  | 0.690652  |
| 51 | Br | 8.839320  | -1.744138 | -5.854750 |
| 52 | Br | -0.671383 | -9.786190 | -2.143483 |

---

**Table S62.** Atomic coordinates for optimized structure of biradical **31A** obtained using the B3LYP/6-311++G(d,p) level of theory

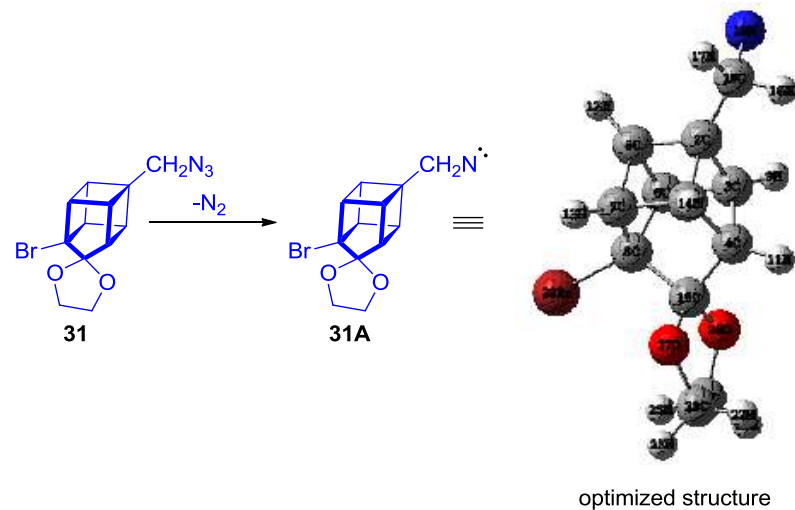

| Center Number | Atomic Symbol | Coordinates (Angstroms) |           |           |
|---------------|---------------|-------------------------|-----------|-----------|
|               |               | X                       | Y         | Z         |
| 1             | C             | -0.054873               | -0.559995 | 0.056703  |
| 2             | C             | 1.476318                | -0.908485 | 0.086096  |
| 3             | C             | 1.740424                | 0.630072  | -0.071767 |
| 4             | C             | 0.249940                | 0.881586  | -0.448476 |
| 5             | C             | 0.272131                | 1.088359  | 1.828971  |
| 6             | C             | 1.755659                | 0.771936  | 1.501507  |
| 7             | C             | -0.037909               | -0.419395 | 1.630757  |
| 8             | C             | 1.490089                | -0.765373 | 1.643371  |
| 9             | H             | 2.556196                | 1.068141  | -0.641883 |
| 10            | H             | 2.561325                | 1.321027  | 1.979761  |
| 11            | H             | 0.013197                | 1.127825  | -1.481842 |
| 12            | H             | 1.983160                | -1.423459 | 2.354992  |
| 13            | H             | -0.806485               | -0.911603 | 2.219961  |
| 14            | H             | -0.826495               | -1.173570 | -0.404548 |

|    |    |           |           |           |
|----|----|-----------|-----------|-----------|
| 15 | C  | 2.119714  | -2.009183 | -0.740838 |
| 16 | H  | 1.884705  | -1.854524 | -1.810435 |
| 17 | H  | 1.684392  | -2.986203 | -0.460439 |
| 18 | N  | 3.525917  | -2.068013 | -0.581639 |
| 19 | C  | -0.311862 | 1.839108  | 0.609651  |
| 20 | C  | -2.124201 | 3.229518  | 0.297042  |
| 21 | C  | -0.907968 | 4.061454  | 0.687289  |
| 22 | H  | -2.331122 | 3.291186  | -0.777991 |
| 23 | H  | -3.026189 | 3.474347  | 0.858661  |
| 24 | H  | -0.757879 | 4.943982  | 0.064761  |
| 25 | H  | -0.931925 | 4.348116  | 1.742726  |
| 26 | O  | 0.173933  | 3.154966  | 0.439366  |
| 27 | O  | -1.724079 | 1.901645  | 0.649515  |
| 28 | Br | -0.099676 | 1.844211  | 3.590493  |

**Table S63.** Atomic coordinates for optimized structure of biradical **32A** obtained using the B3LYP/6-311++G(d,p) level of theory

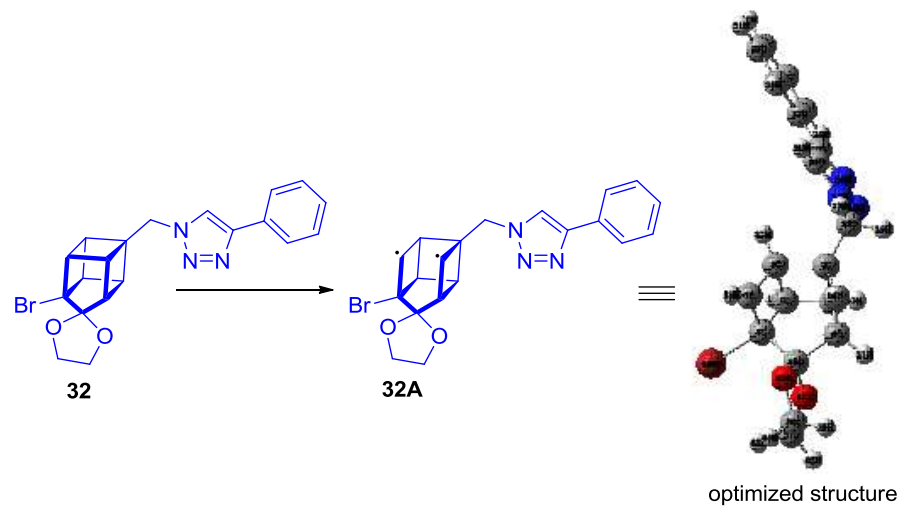

| Center | Atomic | Coordinates (Angstroms) |           |           |
|--------|--------|-------------------------|-----------|-----------|
| Number | Symbol | X                       | Y         | Z         |
| 1      | C      | 0.032706                | -0.412702 | -0.687428 |
| 2      | C      | 1.420747                | -0.772293 | -0.263507 |
| 3      | C      | 1.797638                | 0.751218  | -0.388064 |
| 4      | C      | 0.283983                | 1.068613  | -0.632031 |
| 5      | C      | 0.662630                | 1.233065  | 1.775897  |
| 6      | C      | 2.034838                | 0.853826  | 1.138876  |
| 7      | C      | 0.451828                | -0.198009 | 2.104003  |
| 8      | C      | 1.651409                | -0.652486 | 1.349125  |
| 9      | H      | 2.550362                | 1.114246  | -1.081618 |
| 10     | H      | 2.942721                | 1.297416  | 1.534375  |
| 11     | H      | 0.011206                | 1.650915  | -1.516194 |
| 12     | H      | 2.321630                | -1.404302 | 1.770095  |
| 13     | H      | -0.380615               | -0.701579 | 2.578567  |
| 14     | H      | -0.886724               | -0.985890 | -0.739766 |
| 15     | C      | 2.120066                | -1.918770 | -0.976090 |
| 16     | H      | 2.090573                | -1.753652 | -2.055448 |
| 17     | H      | 1.606981                | -2.861106 | -0.765730 |
| 18     | N      | 3.520162                | -2.095161 | -0.594331 |
| 19     | C      | 4.087733                | -3.068834 | 0.159028  |
| 20     | C      | 5.428862                | -2.734965 | 0.218426  |
| 21     | H      | 3.516279                | -3.883543 | 0.568977  |
| 22     | C      | 6.548583                | -3.407972 | 0.888499  |
| 23     | C      | 7.824923                | -2.827234 | 0.877652  |
| 24     | C      | 6.372757                | -4.632293 | 1.549089  |
| 25     | C      | 8.891796                | -3.455616 | 1.512499  |
| 26     | H      | 7.965539                | -1.882770 | 0.367388  |
| 27     | C      | 7.441451                | -5.257875 | 2.183852  |
| 28     | H      | 5.396959                | -5.105497 | 1.566980  |
| 29     | C      | 8.706610                | -4.672031 | 2.168785  |

|    |    |           |           |           |
|----|----|-----------|-----------|-----------|
| 30 | H  | 9.872224  | -2.992705 | 1.495261  |
| 31 | H  | 7.286420  | -6.204569 | 2.689349  |
| 32 | H  | 9.539401  | -5.159325 | 2.663016  |
| 33 | N  | 4.449684  | -1.201024 | -0.986522 |
| 34 | N  | 5.593266  | -1.581685 | -0.499290 |
| 35 | C  | -0.226731 | 1.821960  | 0.639190  |
| 36 | C  | -2.284291 | 2.853420  | 0.585608  |
| 37 | C  | -1.205978 | 3.911882  | 0.786054  |
| 38 | H  | -2.638704 | 2.821456  | -0.451482 |
| 39 | H  | -3.134550 | 2.954363  | 1.260342  |
| 40 | H  | -1.300820 | 4.768646  | 0.117932  |
| 41 | H  | -1.152182 | 4.250191  | 1.824155  |
| 42 | O  | -0.010059 | 3.204498  | 0.433141  |
| 43 | O  | -1.598585 | 1.639736  | 0.912443  |
| 44 | Br | 0.692139  | 2.415751  | 3.404437  |

**Table S64.** Atomic coordinates for optimized structure of biradical **32B** obtained using the B3LYP/6-311++G(d,p) level of theory

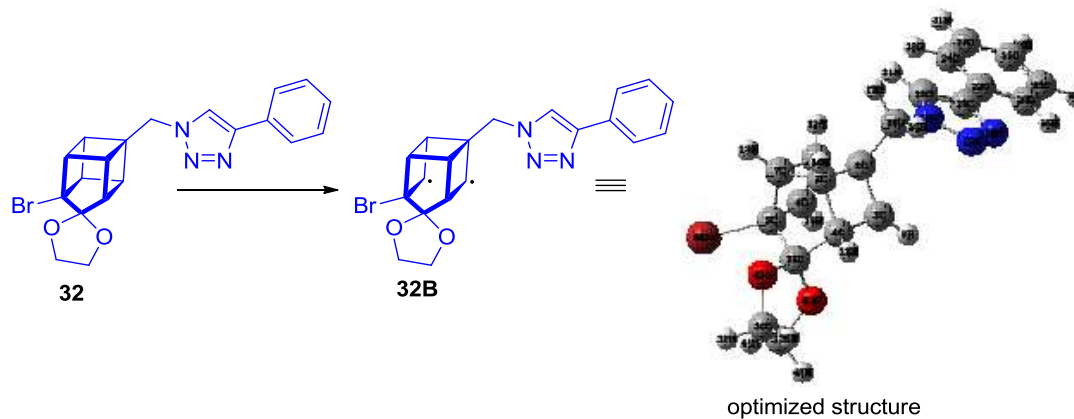



| Center | Atomic | Coordinates (Angstroms) |           |           |
|--------|--------|-------------------------|-----------|-----------|
| Number | Symbol | X                       | Y         | Z         |
| 1      | C      | -0.134348               | -0.567491 | -0.423821 |
| 2      | C      | 1.386408                | -0.950428 | -0.281575 |
| 3      | C      | 1.727396                | 0.453403  | -0.664005 |
| 4      | C      | 0.300423                | 0.924580  | -0.615064 |
| 5      | C      | -0.081614               | 0.589568  | 1.776146  |
| 6      | C      | 1.276331                | 0.100306  | 2.115224  |
| 7      | C      | -0.373086               | -0.781372 | 1.092227  |
| 8      | C      | 1.135831                | -1.149302 | 1.320554  |
| 9      | H      | 2.668364                | 0.978725  | -0.763400 |
| 10     | H      | 2.106537                | 0.592814  | 2.604492  |
| 11     | H      | -0.070317               | 1.467992  | -1.488876 |
| 12     | H      | 1.488167                | -2.101971 | 1.722334  |
| 13     | H      | -1.201450               | -1.383165 | 1.453404  |
| 14     | H      | -0.796057               | -1.027358 | -1.155153 |
| 15     | C      | 2.015422                | -2.133515 | -1.000765 |
| 16     | H      | 1.910281                | -2.013523 | -2.080410 |
| 17     | H      | 1.530396                | -3.068988 | -0.709414 |
| 18     | N      | 3.445819                | -2.267237 | -0.734963 |
| 19     | C      | 4.078764                | -2.943883 | 0.255244  |
| 20     | C      | 5.422419                | -2.677724 | 0.064396  |
| 21     | H      | 3.546929                | -3.543930 | 0.972743  |
| 22     | C      | 6.599120                | -3.135473 | 0.813502  |
| 23     | C      | 7.885246                | -2.759063 | 0.400108  |
| 24     | C      | 6.469740                | -3.949832 | 1.947668  |
| 25     | C      | 9.006727                | -3.187024 | 1.103902  |
| 26     | H      | 7.990057                | -2.130212 | -0.474962 |
| 27     | C      | 7.593205                | -4.377485 | 2.648583  |
| 28     | H      | 5.486349                | -4.252926 | 2.290430  |
| 29     | C      | 8.867855                | -3.997773 | 2.229942  |

|    |    |           |           |           |
|----|----|-----------|-----------|-----------|
| 30 | H  | 9.993931  | -2.886373 | 0.770830  |
| 31 | H  | 7.472975  | -5.006778 | 3.523416  |
| 32 | H  | 9.743230  | -4.330271 | 2.776214  |
| 33 | N  | 4.341084  | -1.611041 | -1.502776 |
| 34 | N  | 5.523982  | -1.856697 | -1.025869 |
| 35 | C  | -0.165567 | 1.683548  | 0.667006  |
| 36 | C  | -1.510677 | 3.544167  | 0.436277  |
| 37 | C  | -0.246573 | 3.925426  | 1.197920  |
| 38 | H  | -1.472944 | 3.875824  | -0.608055 |
| 39 | H  | -2.430483 | 3.899471  | 0.901638  |
| 40 | H  | 0.232161  | 4.833370  | 0.830137  |
| 41 | H  | -0.425608 | 4.005764  | 2.273626  |
| 42 | O  | 0.626297  | 2.821177  | 0.920523  |
| 43 | O  | -1.501891 | 2.114446  | 0.501076  |
| 44 | Br | -1.165958 | 1.067567  | 3.405082  |

**Table S65.** Atomic coordinates for optimized structure of biradical **32C** obtained using the B3LYP/6-311++G(d,p) level of theory

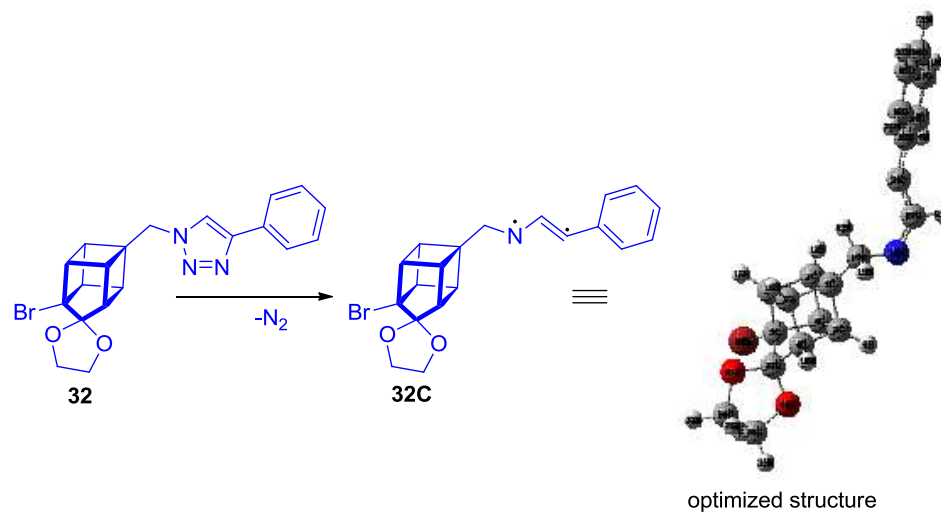

| Center | Atomic | Coordinates (Angstroms) |           |           |
|--------|--------|-------------------------|-----------|-----------|
| Number | Symbol | X                       | Y         | Z         |
| 1      | C      | 0.772031                | -0.430454 | -0.095629 |
| 2      | C      | 2.216682                | -0.122522 | 0.438264  |
| 3      | C      | 1.801272                | 1.389658  | 0.431489  |
| 4      | C      | 0.535280                | 1.074756  | -0.420559 |
| 5      | C      | -0.200025               | 0.862839  | 1.732699  |
| 6      | C      | 1.292822                | 1.244333  | 1.919331  |
| 7      | C      | 0.265564                | -0.577538 | 1.393564  |
| 8      | C      | 1.710591                | -0.265211 | 1.913071  |
| 9      | H      | 2.469233                | 2.211563  | 0.187394  |
| 10     | H      | 1.591082                | 1.980750  | 2.659814  |
| 11     | H      | 0.524818                | 1.383169  | -1.464380 |
| 12     | H      | 2.210804                | -0.780189 | 2.730375  |
| 13     | H      | -0.339892               | -1.435973 | 1.671230  |
| 14     | H      | 0.522603                | -1.212820 | -0.810431 |
| 15     | C      | 3.483628                | -0.683252 | -0.149067 |
| 16     | H      | 3.522416                | -0.418457 | -1.216779 |
| 17     | H      | 3.478151                | -1.784193 | -0.091144 |
| 18     | N      | 4.652297                | -0.097020 | 0.486174  |
| 19     | C      | 5.649144                | -0.887933 | 0.789529  |
| 20     | C      | 5.766444                | -2.261669 | 0.594998  |
| 21     | H      | 6.521872                | -0.392975 | 1.235074  |
| 22     | C      | 6.573728                | -3.345720 | 0.986000  |
| 23     | C      | 6.836540                | -4.416934 | 0.092947  |
| 24     | C      | 7.122966                | -3.417163 | 2.295791  |
| 25     | C      | 7.622836                | -5.488559 | 0.485561  |
| 26     | H      | 6.415911                | -4.380952 | -0.904998 |
| 27     | C      | 7.910334                | -4.494538 | 2.671873  |
| 28     | H      | 6.915320                | -2.620107 | 2.999993  |
| 29     | C      | 8.165407                | -5.534563 | 1.773343  |

|    |    |           |           |           |
|----|----|-----------|-----------|-----------|
| 30 | H  | 7.817399  | -6.295171 | -0.212270 |
| 31 | H  | 8.325564  | -4.530233 | 3.672932  |
| 32 | H  | 8.778032  | -6.375856 | 2.075781  |
| 33 | C  | -0.673759 | 1.513399  | 0.412691  |
| 34 | C  | -2.743409 | 2.073050  | -0.439924 |
| 35 | C  | -2.192653 | 3.242881  | 0.367690  |
| 36 | H  | -2.643973 | 2.242034  | -1.518934 |
| 37 | H  | -3.777431 | 1.820458  | -0.202359 |
| 38 | H  | -2.283516 | 4.207176  | -0.133519 |
| 39 | H  | -2.640532 | 3.296273  | 1.364480  |
| 40 | O  | -0.800287 | 2.921052  | 0.460232  |
| 41 | O  | -1.910674 | 0.985315  | -0.029865 |
| 42 | Br | -1.365084 | 1.075373  | 3.289036  |

**Table S66.** Atomic coordinates for optimized structure of biradical **32D** obtained using the B3LYP/6-311++G(d,p) level of theory

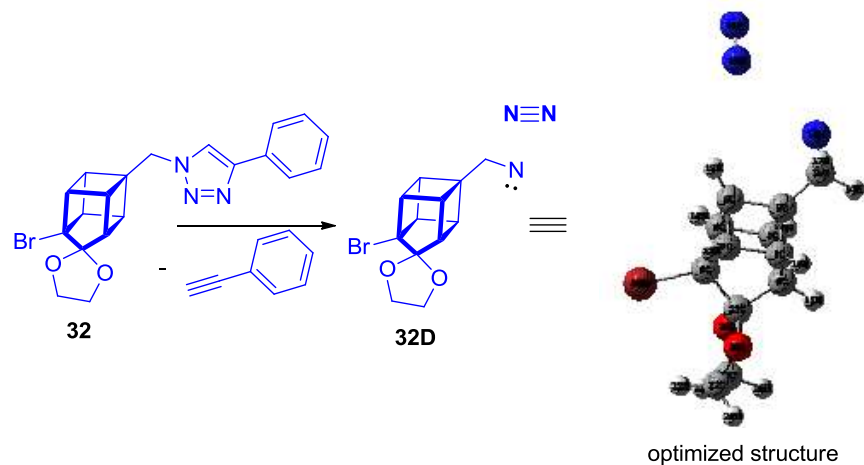

| Center Number | Atomic Symbol | Coordinates (Angstroms) |   |   |
|---------------|---------------|-------------------------|---|---|
|               |               | X                       | Y | Z |

|    |    |           |           |           |
|----|----|-----------|-----------|-----------|
| 1  | C  | 0.277468  | -0.329924 | -0.528001 |
| 2  | C  | 1.845412  | -0.349502 | -0.614628 |
| 3  | C  | 1.793476  | 1.191618  | -0.322270 |
| 4  | C  | 0.260428  | 1.225947  | -0.596628 |
| 5  | C  | 0.400219  | 0.785415  | 1.642989  |
| 6  | C  | 1.891225  | 0.884677  | 1.224647  |
| 7  | C  | 0.374713  | -0.635341 | 1.018909  |
| 8  | C  | 1.938192  | -0.650372 | 0.917234  |
| 9  | H  | 2.466808  | 1.930871  | -0.749682 |
| 10 | H  | 2.606441  | 1.430583  | 1.832845  |
| 11 | H  | -0.091052 | 1.697581  | -1.512329 |
| 12 | H  | 2.594736  | -1.368964 | 1.401496  |
| 13 | H  | -0.241553 | -1.419982 | 1.448545  |
| 14 | H  | -0.389888 | -0.934314 | -1.139510 |
| 15 | C  | 2.634645  | -1.015872 | -1.729363 |
| 16 | H  | 2.306580  | -0.615456 | -2.706674 |
| 17 | H  | 2.415037  | -2.099368 | -1.741722 |
| 18 | N  | 4.032851  | -0.830730 | -1.601081 |
| 19 | N  | 4.733768  | -3.933545 | 0.718503  |
| 20 | N  | 5.803453  | -4.159679 | 0.787833  |
| 21 | C  | -0.402697 | 1.710435  | 0.698610  |
| 22 | C  | -2.432476 | 2.618451  | 1.293596  |
| 23 | C  | -1.456917 | 3.743818  | 0.968661  |
| 24 | H  | -3.413970 | 2.737612  | 0.833709  |
| 25 | H  | -2.539958 | 2.471184  | 2.372137  |
| 26 | H  | -1.646844 | 4.173608  | -0.021994 |
| 27 | H  | -1.434732 | 4.538415  | 1.715012  |
| 28 | O  | -0.190257 | 3.078396  | 0.985252  |
| 29 | O  | -1.797426 | 1.481656  | 0.694865  |
| 30 | Br | 0.003233  | 0.912737  | 3.550955  |

---

**Table S67.** Atomic coordinates for optimized structure of biradical **33A** obtained using the B3LYP/6-311++G(d,p) level of theory

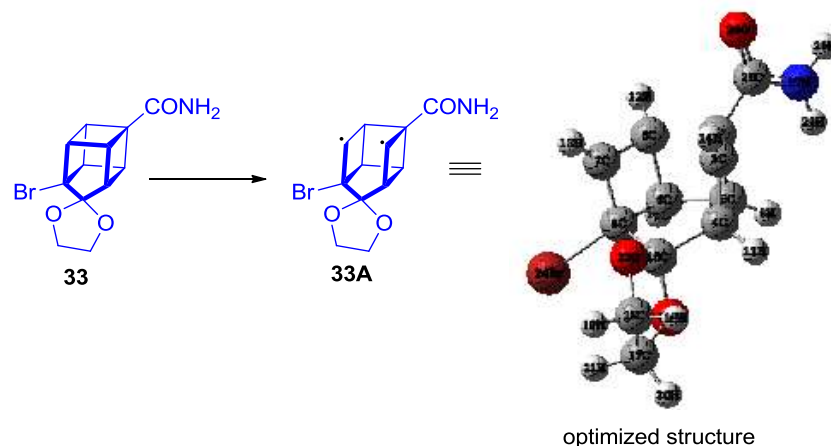

| Center Number | Atomic Symbol | Coordinates (Angstroms) |           |           |
|---------------|---------------|-------------------------|-----------|-----------|
|               |               | X                       | Y         | Z         |
| 1             | C             | 0.048762                | -0.731571 | -0.033689 |
| 2             | C             | 1.606842                | -0.921813 | 0.169447  |
| 3             | C             | 1.802883                | 0.406103  | -0.489139 |
| 4             | C             | 0.333395                | 0.725477  | -0.525631 |
| 5             | C             | -0.033321               | 0.839333  | 1.889423  |
| 6             | C             | 1.362253                | 0.556289  | 2.305093  |
| 7             | C             | -0.183562               | -0.662735 | 1.494093  |
| 8             | C             | 1.348109                | -0.833615 | 1.776373  |
| 9             | H             | 2.669343                | 1.055571  | -0.561365 |
| 10            | H             | 2.129828                | 1.207595  | 2.703077  |
| 11            | H             | -0.084163               | 1.044127  | -1.484874 |
| 12            | H             | 1.789460                | -1.670546 | 2.316443  |
| 13            | H             | -0.949855               | -1.263608 | 1.973062  |
| 14            | H             | -0.541767               | -1.404514 | -0.650089 |
| 15            | C             | -0.208541               | 1.680001  | 0.584067  |
| 16            | C             | -1.725319               | 3.346043  | 0.063416  |

|    |    |           |           |           |
|----|----|-----------|-----------|-----------|
| 17 | C  | -0.489446 | 3.962292  | 0.709982  |
| 18 | H  | -1.744588 | 3.510320  | -1.020332 |
| 19 | H  | -2.664776 | 3.683248  | 0.502657  |
| 20 | H  | -0.104729 | 4.834668  | 0.181110  |
| 21 | H  | -0.656978 | 4.205331  | 1.762565  |
| 22 | O  | -1.575137 | 1.951087  | 0.345696  |
| 23 | O  | 0.478940  | 2.910293  | 0.590814  |
| 24 | Br | -1.173755 | 1.528940  | 3.400738  |
| 25 | C  | 2.325633  | -2.185565 | -0.255669 |
| 26 | O  | 2.231869  | -3.228684 | 0.371155  |
| 27 | N  | 3.065243  | -2.076549 | -1.396604 |
| 28 | H  | 3.509673  | -2.903235 | -1.765216 |
| 29 | H  | 3.076053  | -1.223357 | -1.931603 |

**Table S68.** Atomic coordinates for optimized structure of biradical **33B** obtained using the B3LYP/6-311++G(d,p) level of theory

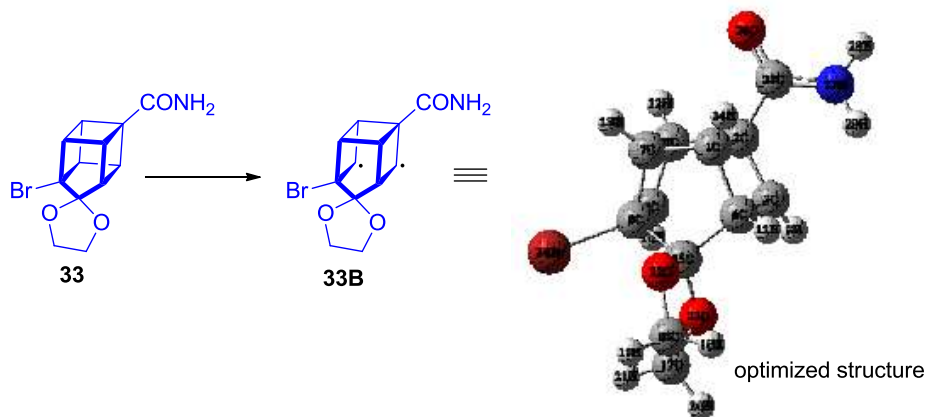

| Center Number | Atomic Symbol | Coordinates (Angstroms) |           |           |
|---------------|---------------|-------------------------|-----------|-----------|
|               |               | X                       | Y         | Z         |
| 1             | C             | 0.125245                | -0.473024 | -0.731578 |

|    |    |           |           |           |
|----|----|-----------|-----------|-----------|
| 2  | C  | 1.313682  | -1.026374 | -0.020677 |
| 3  | C  | 1.895447  | 0.436307  | 0.052328  |
| 4  | C  | 0.534929  | 0.958630  | -0.523095 |
| 5  | C  | 0.338244  | 0.987513  | 1.912067  |
| 6  | C  | 1.767917  | 0.451563  | 1.596331  |
| 7  | C  | -0.118771 | -0.413530 | 2.081736  |
| 8  | C  | 1.166148  | -0.995812 | 1.613886  |
| 9  | H  | 2.823097  | 0.756279  | -0.420119 |
| 10 | H  | 2.596534  | 0.763979  | 2.224292  |
| 11 | H  | 0.560018  | 1.602677  | -1.406245 |
| 12 | H  | 1.607513  | -1.860454 | 2.110843  |
| 13 | H  | -1.096028 | -0.822181 | 2.301838  |
| 14 | H  | -0.798199 | -0.933421 | -1.058138 |
| 15 | C  | -0.166003 | 1.733939  | 0.639461  |
| 16 | C  | -1.996803 | 3.049250  | 0.175179  |
| 17 | C  | -0.871135 | 3.936002  | 0.694672  |
| 18 | H  | -2.091946 | 3.104521  | -0.915653 |
| 19 | H  | -2.964230 | 3.245286  | 0.637657  |
| 20 | H  | -0.690601 | 4.821258  | 0.083834  |
| 21 | H  | -1.024885 | 4.224295  | 1.737830  |
| 22 | O  | -1.573054 | 1.739717  | 0.569583  |
| 23 | O  | 0.273047  | 3.078773  | 0.582670  |
| 24 | Br | 0.118942  | 2.094862  | 3.579182  |
| 25 | C  | 1.953186  | -2.296526 | -0.534905 |
| 26 | O  | 1.352165  | -3.356610 | -0.515856 |
| 27 | N  | 3.236754  | -2.181091 | -0.985206 |
| 28 | H  | 3.681650  | -2.996824 | -1.378216 |
| 29 | H  | 3.689487  | -1.288078 | -1.078700 |

---
