# Supplementary material for: Synthesis and energetic properties of homocubane based high energy density materials
Source: Royal Society of Chemistry journal article supplement (doi:10.1039/d0qo01084g), 2020-10-23
Supplement: d0qo01084g2.pdf [file d0qo01084g2.pdf]

## Crystal Data

For

### Synthesis and Energetic Properties of Homocubane Based High Energy Density Materials

Sohan Lal,<sup>a</sup> Arindrajit Chowdhury,<sup>b\*</sup> Neeraj Kumbhakarna,<sup>b\*</sup> Sundaramoorthy Nandagopal,<sup>c</sup> Arvind Kumar,<sup>c</sup> Irishi N. N. Namboothiri<sup>a\*</sup>

*Department of Chemistry,<sup>a</sup> Department of Mechanical Engineering,<sup>b</sup> Indian Institute of Technology Bombay, Mumbai, 400 076, India' irishi@iitb.ac.in, arindra@iitb.ac.in, neeraj\_k@iitb.ac.in*

*High Energy Materials Research Laboratory, Defence Research And Development Organisation, Pune 411 021, Maharashtra, India<sup>c</sup>*

| <b>Entry</b> | <b>Table of Contents</b>                                 | <b>Page</b> |
|--------------|----------------------------------------------------------|-------------|
| 1            | Table XR1. Crystal Data and Structure Refinement for 8   | 2           |
| 2            | Table XR1. Crystal Data and Structure Refinement for 9   | 2           |
| 3            | Table XR2. Crystal Data and Structure Refinement for 10  | 3           |
| 4            | Table XR2. Crystal Data and Structure Refinement for 12  | 3           |
| 5            | Table XR3. Crystal Data and Structure Refinement for 15  | 5           |
| 6            | Table XR3. Crystal Data and Structure Refinement for 15  | 5           |
| 7            | Table XR4. Crystal Data and Structure Refinement for 21a | 7           |
| 8            | Table XR4. Crystal Data and Structure Refinement for 21b | 7           |
| 9            | Table XR5. Crystal Data and Structure Refinement for 24  | 9           |
| 10           | Table XR5. Crystal Data and Structure Refinement for 27  | 9           |
| 11           | Table XR6. Crystal Data and Structure Refinement for 28  | 11          |
| 12           | Table XR6. Crystal Data and Structure Refinement for 30b | 11          |

**Table XR1. Single crystal X-ray data and structure refinement for compounds 8 and 9.**

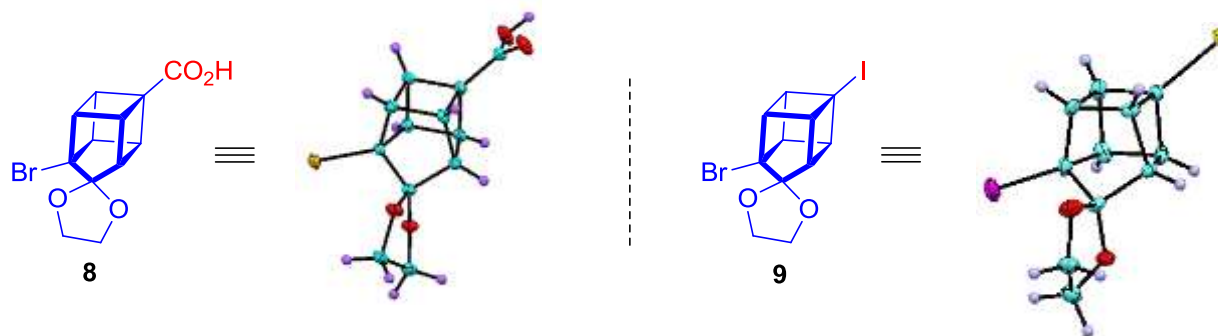

| Identification code                | <b>8</b>                                         | <b>9</b>                                          |
|------------------------------------|--------------------------------------------------|---------------------------------------------------|
| CCDC                               | 1967802                                          | 1967801                                           |
| Empirical formula                  | C <sub>12</sub> H <sub>11</sub> BrO <sub>4</sub> | C <sub>11</sub> H <sub>10</sub> BrIO <sub>2</sub> |
| Formula weight                     | 299.12                                           | 381.00                                            |
| Temperature/K                      | 150                                              | 150                                               |
| Crystal system                     | triclinic                                        | monoclinic                                        |
| Space group                        | P-1                                              | P2 <sub>1</sub> /c                                |
| a/Å                                | 5.8311(2)                                        | 14.4803                                           |
| b/Å                                | 7.7293(3)                                        | 6.2437                                            |
| c/Å                                | 12.1411(5)                                       | 12.7594                                           |
| α/°                                | 100.726(3)                                       | 90                                                |
| β/°                                | 100.614(3)                                       | 106.322                                           |
| γ/°                                | 90.063(3)                                        | 90                                                |
| Volume/Å <sup>3</sup>              | 528.09(4)                                        | 1107.09                                           |
| Z                                  | 2                                                | 4                                                 |
| ρ <sub>calc</sub> /cm <sup>3</sup> | 1.881                                            | 2.286                                             |

|                                                |                                                               |                                                               |
|------------------------------------------------|---------------------------------------------------------------|---------------------------------------------------------------|
| $\mu/\text{mm}^{-1}$                           | 3.891                                                         | 6.477                                                         |
| F(000)                                         | 300.0                                                         | 720.0                                                         |
| Crystal size/ $\text{mm}^3$                    | $0.203 \times 0.132 \times 0.09$                              | $0.168 \times 0.181 \times 0.111$                             |
| Radiation                                      | MoK $\alpha$ ( $\lambda = 0.71073$ )                          | MoK $\alpha$ ( $\lambda = 0.71073$ )                          |
| 2 $\theta$ range for data collection/ $^\circ$ | 5.816 to 62.554                                               | 5.864 to 49.988                                               |
| Index ranges                                   | $-8 \leq h \leq 8, -11 \leq k \leq 11, -17 \leq l \leq 17$    | $-17 \leq h \leq 17, -7 \leq k \leq 7, -15 \leq l \leq 15$    |
| Reflections collected                          | 14118                                                         | 11920                                                         |
| Independent reflections                        | 3159 [ $R_{\text{int}} = 0.0386, R_{\text{sigma}} = 0.0254$ ] | 1902 [ $R_{\text{int}} = 0.0303, R_{\text{sigma}} = 0.0164$ ] |
| Data/restraints/parameters                     | 3159/0/158                                                    | 1899/0/136                                                    |
| Goodness-of-fit on $F^2$                       | 1.063                                                         | 1.073                                                         |
| Final R indexes [ $I \geq 2\sigma(I)$ ]        | $R_1 = 0.0259, wR_2 = 0.0590$                                 | $R_1 = 0.0182, wR_2 = 0.0441$                                 |
| Final R indexes [all data]                     | $R_1 = 0.0292, wR_2 = 0.0606$                                 | $R_1 = 0.0195, wR_2 = 0.0446$                                 |
| Largest diff. peak/hole / $e \text{ \AA}^{-3}$ | 0.43/-0.49                                                    | 0.44/-0.53                                                    |

**Table XR2. Single crystal X-ray data and structure refinement for compounds 10 and 12.**

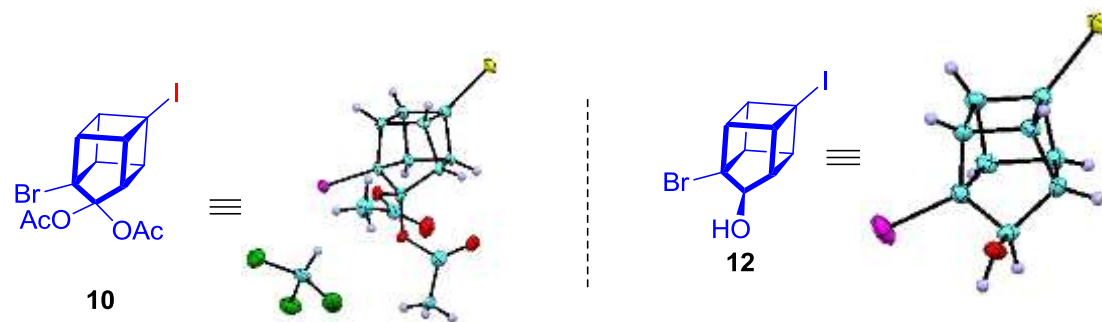

Identification code

10

12

|                                      |                                                                   |                                                                  |
|--------------------------------------|-------------------------------------------------------------------|------------------------------------------------------------------|
| CCDC                                 | 1964255                                                           | 1964254                                                          |
| Empirical formula                    | C <sub>14</sub> H <sub>13</sub> BrCl <sub>3</sub> IO <sub>4</sub> | C <sub>9</sub> H <sub>8</sub> BrIO                               |
| Formula weight                       | 558.40                                                            | 338.96                                                           |
| Temperature/K                        | 150                                                               | 150                                                              |
| Crystal system                       | monoclinic                                                        | monoclinic                                                       |
| Space group                          | P2 <sub>1</sub> /n                                                | P2 <sub>1</sub> /c                                               |
| a/Å                                  | 9.9006(5)                                                         | 6.6943(5)                                                        |
| b/Å                                  | 9.5204(5)                                                         | 22.5033(16)                                                      |
| c/Å                                  | 19.1866(11)                                                       | 19.5658(13)                                                      |
| α/°                                  | 90                                                                | 90                                                               |
| β/°                                  | 93.750(5)                                                         | 98.063(7)                                                        |
| γ/°                                  | 90                                                                | 90                                                               |
| Volume/Å <sup>3</sup>                | 1804.61(17)                                                       | 2918.3(4)                                                        |
| Z                                    | 4                                                                 | 4                                                                |
| ρ <sub>calc</sub> /g/cm <sup>3</sup> | 2.055                                                             | 2.314                                                            |
| μ/mm <sup>-1</sup>                   | 4.447                                                             | 7.348                                                            |
| F(000)                               | 1072.0                                                            | 1896.0                                                           |
| Crystal size/mm <sup>3</sup>         | 0.171 × 0.140 × 0.037                                             | 0.315 × 0.139 × 0.063                                            |
| Radiation                            | MoKα (λ = 0.71073)                                                | MoKα (λ = 0.71073)                                               |
| 2θ range for data collection/°       | 4.762 to 49.996                                                   | 5.55 to 50                                                       |
| Index ranges                         | -11 ≤ h ≤ 11, -11 ≤ k ≤ 11,<br>-22 ≤ l ≤ 22                       | -7 ≤ h ≤ 5, -26 ≤ k ≤ 24,<br>-22 ≤ l ≤ 23                        |
| Reflections collected                | 18421                                                             | 10139                                                            |
| Independent reflections              | 3178 [R <sub>int</sub> = 0.0973,<br>R <sub>sigma</sub> = 0.0755]  | 5017 [R <sub>int</sub> = 0.0265,<br>R <sub>sigma</sub> = 0.0307] |
| Data/restraints/parameters           | 3178/0/210                                                        | 5017/0/331                                                       |
| Goodness-of-fit on F <sup>2</sup>    | 1.044                                                             | 1.035                                                            |

|                                                |                                  |                                  |
|------------------------------------------------|----------------------------------|----------------------------------|
| Final R indexes [ $I \geq 2\sigma(I)$ ]        | $R_1 = 0.0454$ , $wR_2 = 0.0640$ | $R_1 = 0.0284$ , $wR_2 = 0.0622$ |
| Final R indexes [all data]                     | $R_1 = 0.0756$ , $wR_2 = 0.0732$ | $R_1 = 0.0343$ , $wR_2 = 0.0654$ |
| Largest diff. peak/hole / $e \text{ \AA}^{-3}$ | 0.76/-0.64                       | 1.23/-0.88                       |

**Table XR3. Single crystal X-ray data and structure refinement for compounds 12 and 16.**

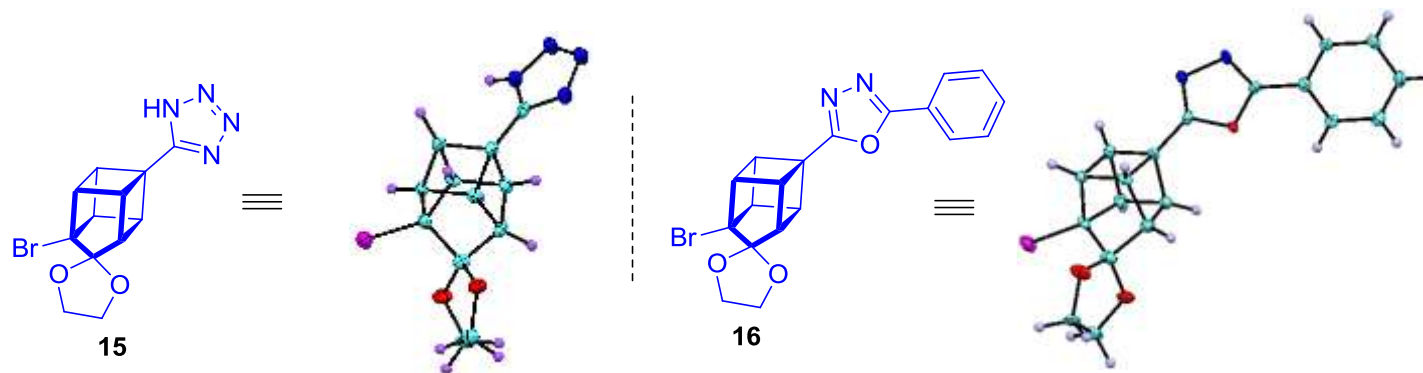

| Identification code | <b>15</b>              | <b>16</b>              |
|---------------------|------------------------|------------------------|
| CCDC                | 1964252                | 1964251                |
| Empirical formula   | $C_{12}H_{11}BrN_4O_2$ | $C_{19}H_{15}BrN_2O_3$ |
| Formula weight      | 323.16                 | 399.24                 |
| Temperature/K       | 150                    | 150                    |
| Crystal system      | monoclinic             | monoclinic             |
| Space group         | $P2_1/c$               | $P2_1/n$               |
| $a/\text{\AA}$      | 16.0595(9)             | 7.2387(3)              |
| $b/\text{\AA}$      | 9.6446(6)              | 11.2396(4)             |
| $c/\text{\AA}$      | 7.9955(4)              | 38.4923(15)            |
| $\alpha/^\circ$     | 90                     | 90                     |
| $\beta/^\circ$      | 96.110(5)              | 91.568(4)              |

|                                               |                                                               |                                                               |
|-----------------------------------------------|---------------------------------------------------------------|---------------------------------------------------------------|
| $\gamma/^\circ$                               | 90                                                            | 90                                                            |
| Volume/ $\text{\AA}^3$                        | 1231.37(12)                                                   | 3130.6(2)                                                     |
| Z                                             | 4                                                             | 8                                                             |
| $\rho_{\text{calc}}/\text{g/cm}^3$            | 1.743                                                         | 1.694                                                         |
| $\mu/\text{mm}^{-1}$                          | 3.342                                                         | 2.649                                                         |
| F(000)                                        | 648.0                                                         | 1616.0                                                        |
| Crystal size/ $\text{mm}^3$                   | $0.209 \times 0.185 \times 0.026$                             | $0.201 \times 0.065 \times 0.039$                             |
| Radiation                                     | MoK $\alpha$ ( $\lambda = 0.71073$ )                          | MoK $\alpha$ ( $\lambda = 0.71073$ )                          |
| $2\Theta$ range for data collection/ $^\circ$ | 4.934 to 49.992                                               | 3.776 to 49.998                                               |
| Index ranges                                  | $-19 \leq h \leq 14, -11 \leq k \leq 11, -9 \leq l \leq 9$    | $-8 \leq h \leq 6, -13 \leq k \leq 13, -45 \leq l \leq 45$    |
| Reflections collected                         | 5984                                                          | 27220                                                         |
| Independent reflections                       | 2167 [ $R_{\text{int}} = 0.0549, R_{\text{sigma}} = 0.0615$ ] | 5503 [ $R_{\text{int}} = 0.0824, R_{\text{sigma}} = 0.0644$ ] |
| Data/restraints/parameters                    | 2167/0/172                                                    | 5503/0/451                                                    |
| Goodness-of-fit on $F^2$                      | 1.041                                                         | 1.096                                                         |
| Final R indexes [ $I \geq 2\sigma(I)$ ]       | $R_1 = 0.0377, wR_2 = 0.0900$                                 | $R_1 = 0.0514, wR_2 = 0.1085$                                 |
| Final R indexes [all data]                    | $R_1 = 0.0518, wR_2 = 0.0976$                                 | $R_1 = 0.0690, wR_2 = 0.1180$                                 |
| Largest diff. peak/hole / $e \text{\AA}^{-3}$ | 0.45/-0.60                                                    | 1.10/-0.58                                                    |

**Table XR4. Single crystal X-ray data and structure refinement for compounds 21a and 21b.**

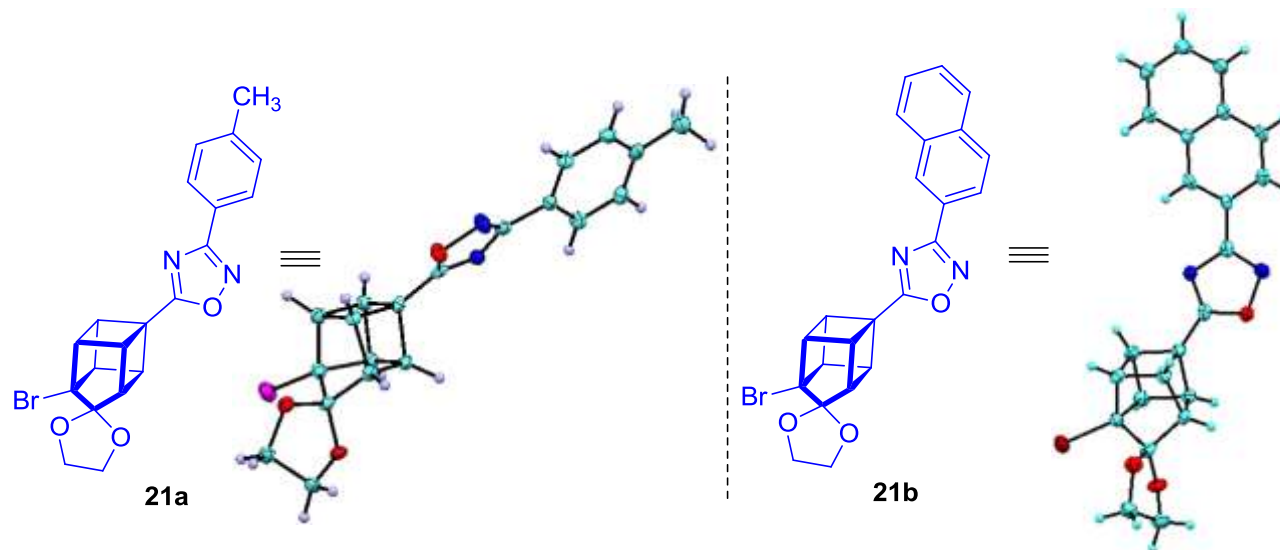

| Identification code | <b>21a</b>                                                      | <b>21b</b>                                                      |
|---------------------|-----------------------------------------------------------------|-----------------------------------------------------------------|
| CCDC                | 1964250                                                         | 1982149                                                         |
| Empirical formula   | C <sub>20</sub> H <sub>17</sub> BrN <sub>2</sub> O <sub>3</sub> | C <sub>23</sub> H <sub>17</sub> BrN <sub>2</sub> O <sub>3</sub> |
| Formula weight      | 413.26                                                          | 449.29                                                          |
| Temperature/K       | 150                                                             | 150.0                                                           |
| Crystal system      | triclinic                                                       | monoclinic                                                      |
| Space group         | P-1                                                             | P2 <sub>1</sub> /n                                              |
| a/Å                 | 6.3380(3)                                                       | 6.1192(3)                                                       |
| b/Å                 | 8.3852(4)                                                       | 25.3018(12)                                                     |
| c/Å                 | 16.4495(8)                                                      | 12.0093(6)                                                      |
| $\alpha$ /°         | 83.445(4)                                                       | 90                                                              |

|                                               |                                                                    |                                                               |
|-----------------------------------------------|--------------------------------------------------------------------|---------------------------------------------------------------|
| $\beta/^\circ$                                | 82.649(4)                                                          | 92.571(5)                                                     |
| $\gamma/^\circ$                               | 79.039(4)                                                          | 90                                                            |
| Volume/ $\text{\AA}^3$                        | 847.58(8)                                                          | 1857.49(16)                                                   |
| Z                                             | 2                                                                  | 4                                                             |
| $\rho_{\text{calc}}/\text{g}/\text{cm}^3$     | 1.619                                                              | 1.607                                                         |
| $\mu/\text{mm}^{-1}$                          | 2.449                                                              | 2.242                                                         |
| F(000)                                        | 420.0                                                              | 912.0                                                         |
| Crystal size/ $\text{mm}^3$                   | $0.331 \times 0.063 \times 0.035$                                  | $0.208 \times 0.125 \times 0.103$                             |
| Radiation                                     | MoK $\alpha$ ( $\lambda = 0.71073$ )                               | MoK $\alpha$ ( $\lambda = 0.71073$ )                          |
| $2\Theta$ range for data collection/ $^\circ$ | 4.97 to 50                                                         | 4.68 to 49.988                                                |
| Index ranges                                  | $-7 \leq h \leq 5, -9 \leq k \leq 9,$<br>$-19 \leq l \leq 19$      | $-6 \leq h \leq 7, -30 \leq k \leq 28, -14 \leq l \leq 14$    |
| Reflections collected                         | 5492                                                               | 10517                                                         |
| Independent reflections                       | 2929 [ $R_{\text{int}} = 0.0498,$<br>$R_{\text{sigma}} = 0.0558$ ] | 3271 [ $R_{\text{int}} = 0.0505, R_{\text{sigma}} = 0.0492$ ] |
| Data/restraints/parameters                    | 2929/0/236                                                         | 3271/0/262                                                    |
| Goodness-of-fit on $F^2$                      | 1.041                                                              | 1.056                                                         |
| Final R indexes [ $I \geq 2\sigma(I)$ ]       | $R_1 = 0.0376, wR_2 = 0.0806$                                      | $R_1 = 0.0363, wR_2 = 0.0768$                                 |
| Final R indexes [all data]                    | $R_1 = 0.0463, wR_2 = 0.0858$                                      | $R_1 = 0.0526, wR_2 = 0.0843$                                 |
| Largest diff. peak/hole / $e \text{\AA}^{-3}$ | 0.36/-0.50                                                         | 0.37/-0.43                                                    |



**Table XR5. Single crystal X-ray data and structure refinement for compounds 24 and 27.**

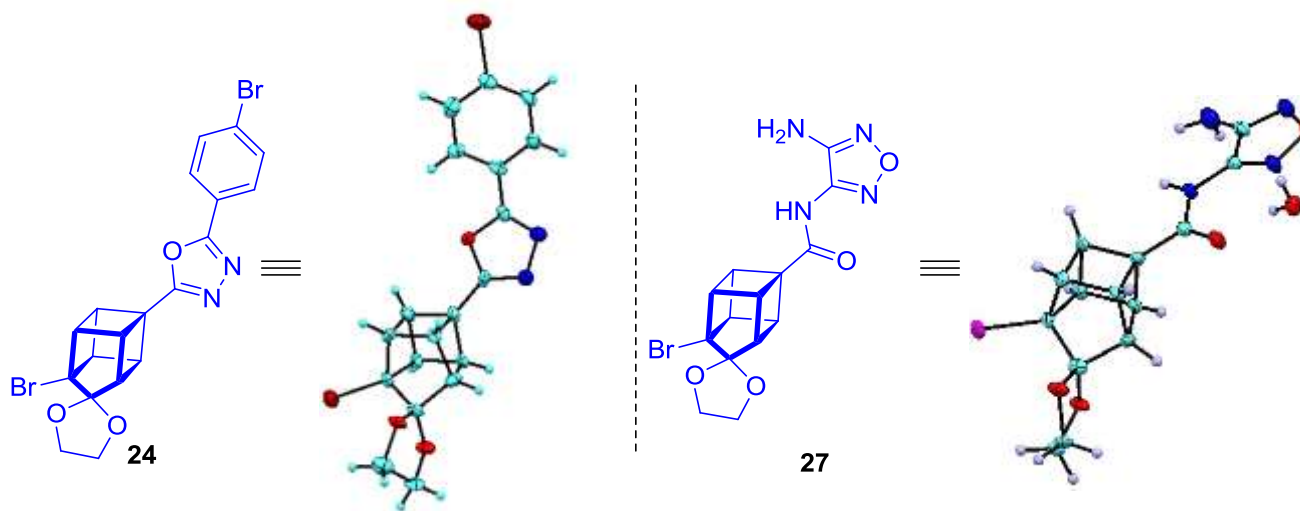

| Identification code | 24                                                                            | 27                                                                                |
|---------------------|-------------------------------------------------------------------------------|-----------------------------------------------------------------------------------|
| CCDC                | 1982155                                                                       | 1963901                                                                           |
| Empirical formula   | C <sub>19</sub> H <sub>14</sub> Br <sub>2</sub> N <sub>2</sub> O <sub>3</sub> | C <sub>14</sub> H <sub>13</sub> BrN <sub>4</sub> O <sub>4</sub> ·H <sub>2</sub> O |
| Formula weight      | 478.14                                                                        | 399.21                                                                            |
| Temperature/K       | 150.0                                                                         | 150                                                                               |
| Crystal system      | monoclinic                                                                    | triclinic                                                                         |
| Space group         | P2 <sub>1</sub> /c                                                            | P-1                                                                               |
| a/Å                 | 22.348(2)                                                                     | 5.8063(3)                                                                         |
| b/Å                 | 6.2154(6)                                                                     | 6.9352(4)                                                                         |
| c/Å                 | 12.4894(11)                                                                   | 19.2746(11)                                                                       |
| α/°                 | 90                                                                            | 86.817(4)                                                                         |
| β/°                 | 90.245(9)                                                                     | 85.678(5)                                                                         |

|                                               |                                                               |                                                               |
|-----------------------------------------------|---------------------------------------------------------------|---------------------------------------------------------------|
| $\gamma/^\circ$                               | 90                                                            | 72.799(5)                                                     |
| Volume/ $\text{\AA}^3$                        | 1734.8(3)                                                     | 738.87(7)                                                     |
| Z                                             | 4                                                             | 2                                                             |
| $\rho_{\text{calc}}/\text{g/cm}^3$            | 1.831                                                         | 1.794                                                         |
| $\mu/\text{mm}^{-1}$                          | 4.695                                                         | 2.818                                                         |
| F(000)                                        | 944.0                                                         | 404.0                                                         |
| Crystal size/ $\text{mm}^3$                   | $0.179 \times 0.126 \times 0.092$                             | $0.2 \times 0.11 \times 0.05$                                 |
| Radiation                                     | MoK $\alpha$ ( $\lambda = 0.71073$ )                          | MoK $\alpha$ ( $\lambda = 0.71073$ )                          |
| $2\Theta$ range for data collection/ $^\circ$ | 6.524 to 49.994                                               | 6.154 to 50                                                   |
| Index ranges                                  | $-26 \leq h \leq 26, -7 \leq k \leq 7, -14 \leq l \leq 14$    | $-6 \leq h \leq 6, -8 \leq k \leq 8, -14 \leq l \leq 22$      |
| Reflections collected                         | 18506                                                         | 5842                                                          |
| Independent reflections                       | 3069 [ $R_{\text{int}} = 0.1694, R_{\text{sigma}} = 0.1277$ ] | 2589 [ $R_{\text{int}} = 0.0734, R_{\text{sigma}} = 0.0782$ ] |
| Data/restraints/parameters                    | 3069/0/235                                                    | 2589/0/221                                                    |
| Goodness-of-fit on $F^2$                      | 1.050                                                         | 1.073                                                         |
| Final R indexes [ $I \geq 2\sigma(I)$ ]       | $R_1 = 0.0698, wR_2 = 0.1310$                                 | $R_1 = 0.0454, wR_2 = 0.0848$                                 |
| Final R indexes [all data]                    | $R_1 = 0.1246, wR_2 = 0.1684$                                 | $R_1 = 0.0601, wR_2 = 0.0928$                                 |
| Largest diff. peak/hole / $e \text{\AA}^{-3}$ | 0.97/-0.97                                                    | 0.78/-0.60                                                    |

**Table XR6. Single crystal X-ray data and structure refinement for compounds 28 and 30b.**

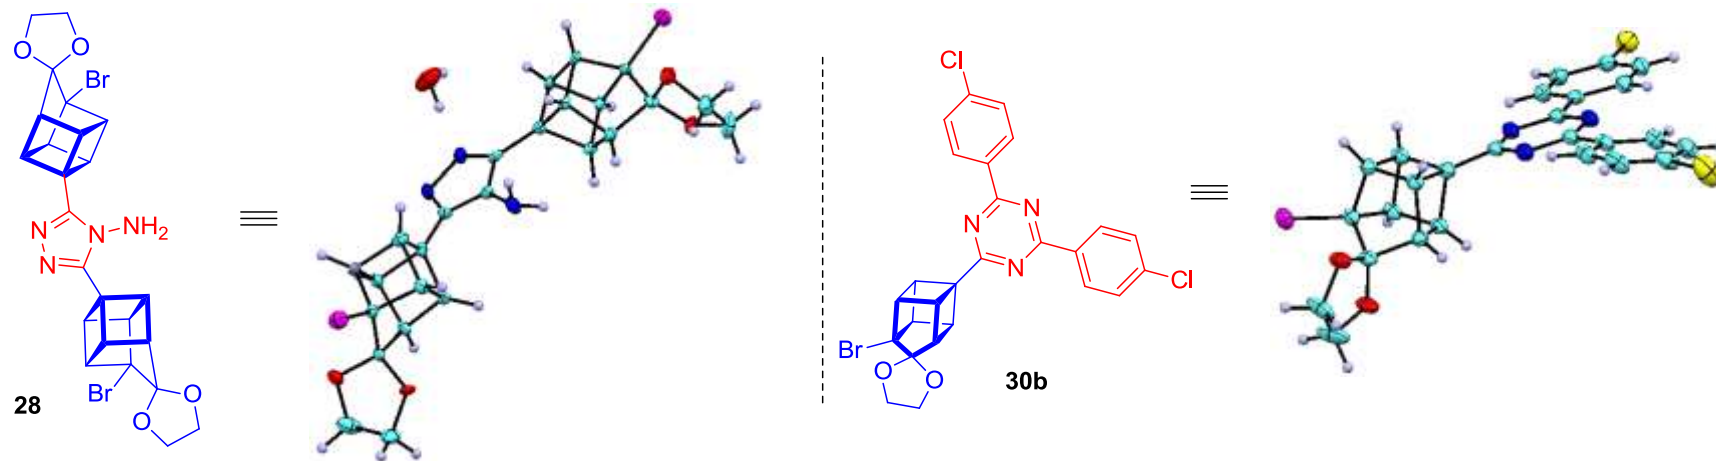

| Identification code | <b>28</b>                | <b>30b</b>                 |
|---------------------|--------------------------|----------------------------|
| CCDC                | 1973818                  | 1963891                    |
| Empirical formula   | $C_{24}H_{24}Br_2N_4O_5$ | $C_{26}H_{18}BrCl_2N_3O_2$ |
| Formula weight      | 608.29                   | 555.24                     |
| Temperature/K       | 150.0                    | 150 K                      |
| Crystal system      | monoclinic               | monoclinic                 |
| Space group         | $P2_1/c$                 | $P21/n$                    |
| $a/\text{\AA}$      | 10.5956(5)               | 5.90980(10)                |
| $b/\text{\AA}$      | 22.2440(10)              | 23.7889(6)                 |
| $c/\text{\AA}$      | 10.0485(4)               | 16.2608(4)                 |
| $\alpha/^\circ$     | 90                       | 90                         |
| $\beta/^\circ$      | 107.185(5)               | 96.123(2)                  |
| $\gamma/^\circ$     | 90                       | 90                         |

|                                             |                                                               |                                                                  |
|---------------------------------------------|---------------------------------------------------------------|------------------------------------------------------------------|
| Volume/Å <sup>3</sup>                       | 2262.58(18)                                                   | 2273.03(9)                                                       |
| Z                                           | 4                                                             | 4                                                                |
| ρ <sub>calc</sub> /cm <sup>3</sup>          | 1.7856                                                        | 1.623                                                            |
| μ/mm <sup>-1</sup>                          | 3.629                                                         | 2.075                                                            |
| F(000)                                      | 1222.3                                                        | 1120.0                                                           |
| Crystal size/mm <sup>3</sup>                | 0.157 × 0.102 × 0.059                                         | 0.21 × 0.141 × 0.089                                             |
| Radiation                                   | Mo Kα (λ = 0.71073)                                           | MoKα (λ = 0.71073)                                               |
| 2θ range for data collection/°              | 3.66 to 50                                                    | 5.322 to 50                                                      |
| Index ranges                                | -14 ≤ h ≤ 14, -32 ≤ k ≤ 30, -14 ≤ l ≤ 13                      | -7 ≤ h ≤ 7, -28 ≤ k ≤ 28,<br>-19 ≤ l ≤ 19                        |
| Reflections collected                       | 24988                                                         | 21939                                                            |
| Independent reflections                     | 3969 [R <sub>int</sub> = 0.0869, R <sub>sigma</sub> = 0.1068] | 3917 [R <sub>int</sub> = 0.0277,<br>R <sub>sigma</sub> = 0.0169] |
| Data/restraints/parameters                  | 3969/0/320                                                    | 3917/0/307                                                       |
| Goodness-of-fit on F <sup>2</sup>           | 1.066                                                         | 1.033                                                            |
| Final R indexes [I >= 2σ (I)]               | R <sub>1</sub> = 0.0522, wR <sub>2</sub> = 0.1148             | R <sub>1</sub> = 0.0258, wR <sub>2</sub> = 0.0644                |
| Final R indexes [all data]                  | R <sub>1</sub> = 0.0732, wR <sub>2</sub> = 0.1259             | R <sub>1</sub> = 0.0285, wR <sub>2</sub> = 0.0659                |
| Largest diff. peak/hole / e Å <sup>-3</sup> | 1.06/-0.85                                                    | 0.34/-0.30                                                       |
