# Supplementary material for: Synthesis and energetic properties of homocubane based high energy density materials
Source: Royal Society of Chemistry journal article supplement (doi:10.1039/d0qo01084g), 2020-10-23
Supplement: d0qo01084g5.pdf [file d0qo01084g5.pdf]

TGA/DTG Data  
For  
**Synthesis and Energetic Properties of Homocubane Based High  
Energy Density Materials**

Sohan Lal,<sup>a</sup> Arindrajit Chowdhury,<sup>b\*</sup> Neeraj Kumbhakarna,<sup>b\*</sup> Sundaramoorthy  
Nandagopal,<sup>c</sup> Arvind Kumar,<sup>c</sup> Irishi N. N. Namboothiri<sup>a\*</sup>

*Department of Chemistry,<sup>a</sup> Department of Mechanical Engineering,<sup>b</sup> Indian Institute of  
Technology Bombay, Mumbai 400 076, India, irishi@iitb.ac.in, arindra@iitb.ac.in,  
neeraj\_k@iitb.ac.in*

*High Energy Materials Research Laboratory, Defence Research and Development  
Organisation, Pune 411 021, Maharashtra, India<sup>c</sup>*

| Entry | Table of Contents                              | Page |
|-------|------------------------------------------------|------|
| 1     | <b>Fig-T1.</b> TGA-DTG of compound <b>8</b>    | 2    |
| 2     | <b>Fig-T2.</b> TGA-DTG of compound <b>9</b>    | 2    |
| 3     | <b>Fig-T3.</b> TGA-DTG of compound <b>10</b>   | 3    |
| 4     | <b>Fig-T4.</b> TGA-DTG of compound <b>11</b>   | 3    |
| 5     | <b>Fig-T5.</b> TGA-DTG of Compound <b>12</b>   | 4    |
| 6     | <b>Fig-T6.</b> TGA-DTG of Compound <b>13</b>   | 4    |
| 7     | <b>Fig-T7.</b> TGA-DTG of Compound <b>14</b>   | 5    |
| 8     | <b>Fig-T8.</b> TGA-DTG of Compound <b>15</b>   | 5    |
| 9     | <b>Fig-T9.</b> TGA-DTG of Compound <b>18</b>   | 6    |
| 10    | <b>Fig-T10.</b> TGA-DTG of Compound <b>19</b>  | 6    |
| 11    | <b>Fig-T11.</b> TGA-DTG of Compound <b>21a</b> | 7    |
| 12    | <b>Fig-T12.</b> TGA-DTG of Compound <b>25</b>  | 7    |
| 13    | <b>Fig-T13.</b> TGA-DTG of Compound <b>27</b>  | 8    |
| 14    | <b>Fig-T14.</b> TGA-DTG of Compound <b>28</b>  | 8    |
| 15    | <b>Fig-T15.</b> TGA-DTG of Compound <b>30a</b> | 9    |
| 16    | <b>Fig-T16.</b> TGA-DTG of Compound <b>30b</b> | 9    |
| 17    | <b>Fig-T17.</b> TGA-DTG of Compound <b>30c</b> | 10   |

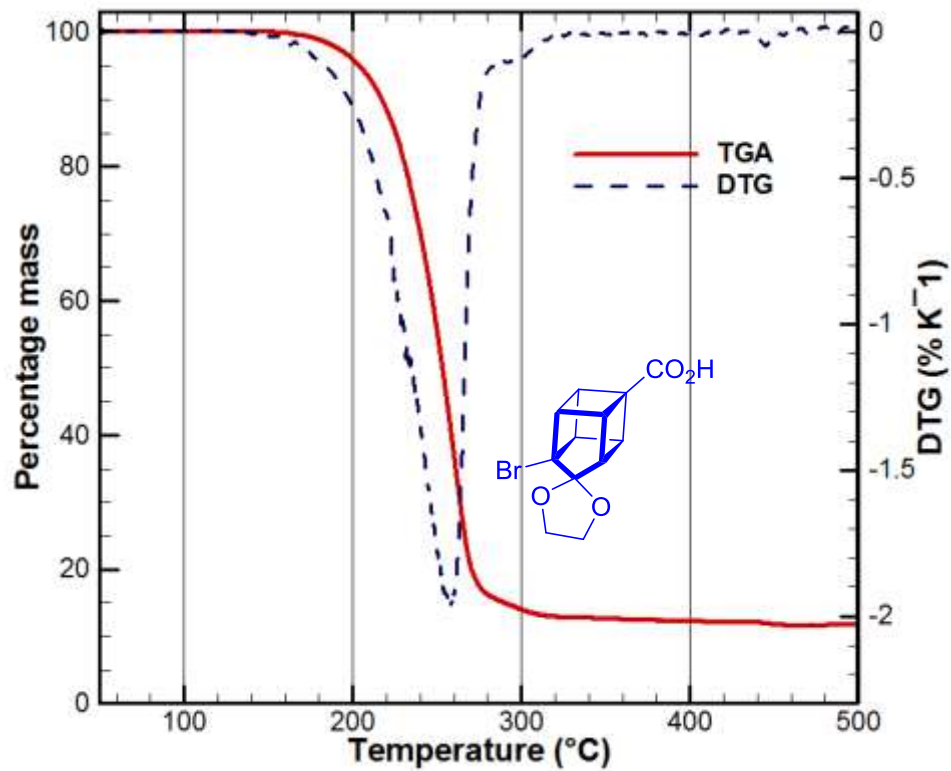

**Fig-T1.** TGA-DTG of Compound **8** at  $15\text{K min}^{-1}$

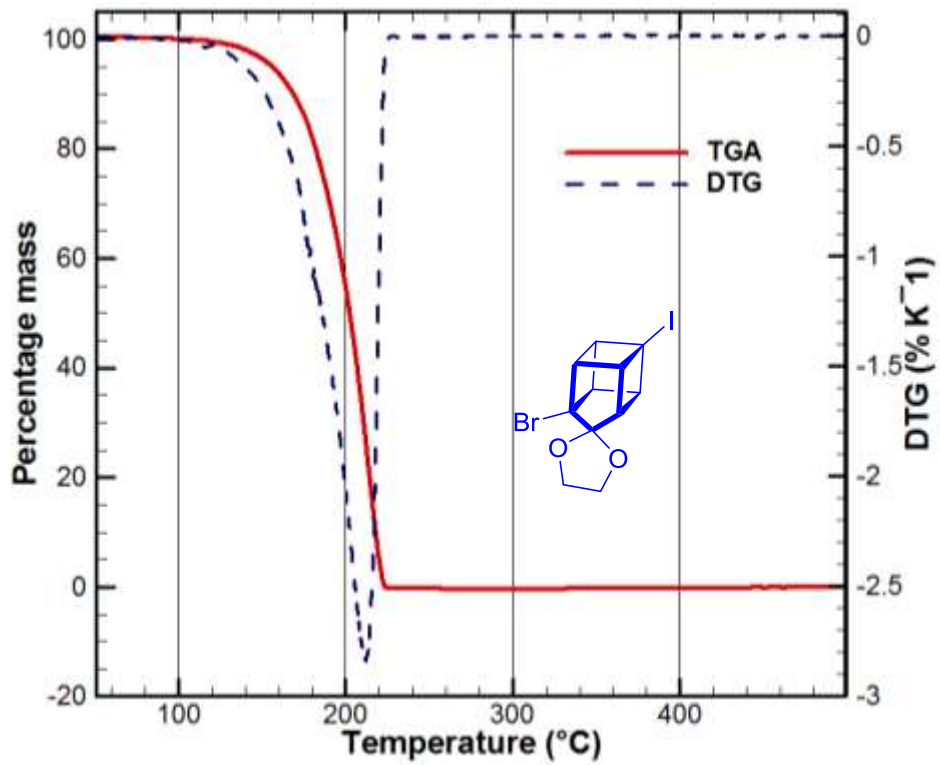

**Fig-T2.** TGA-DTG of compound **9** at  $15\text{K min}^{-1}$

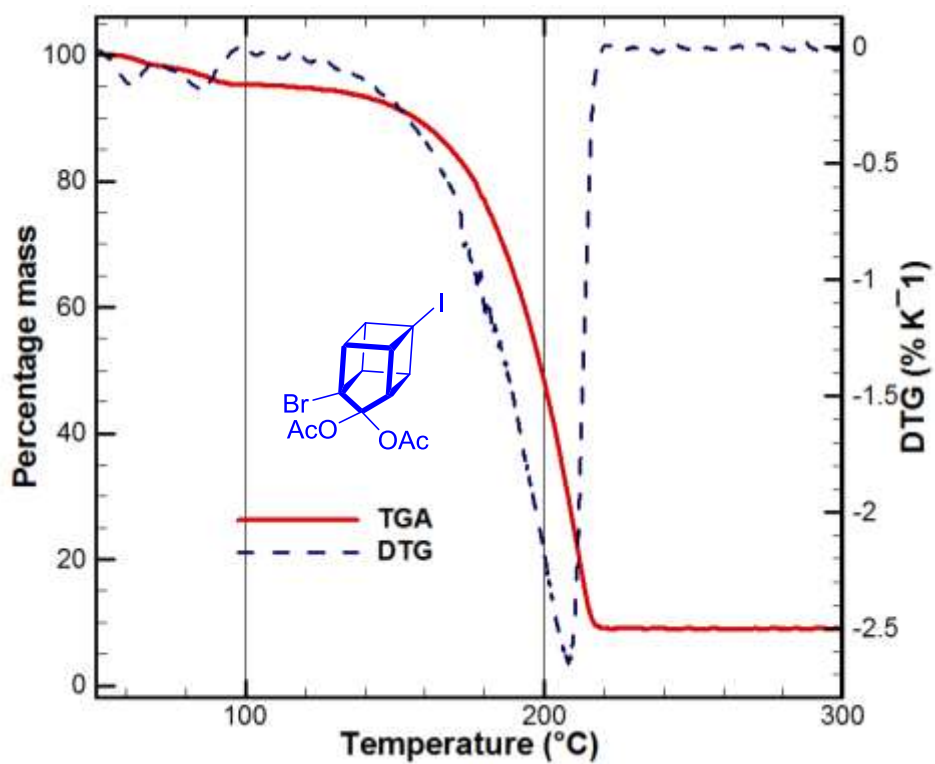

Fig-T3. TGA-DTG of compound **10** at 15K min<sup>-1</sup>

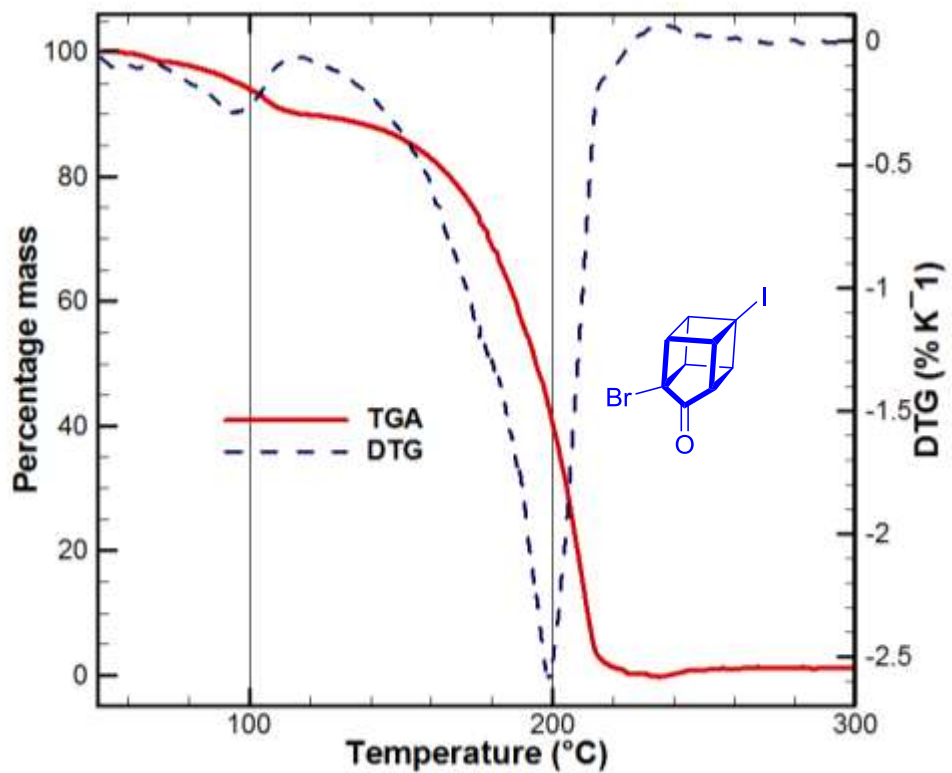

Fig-T4. TGA-DTG of compound **11** at 15K min<sup>-1</sup>

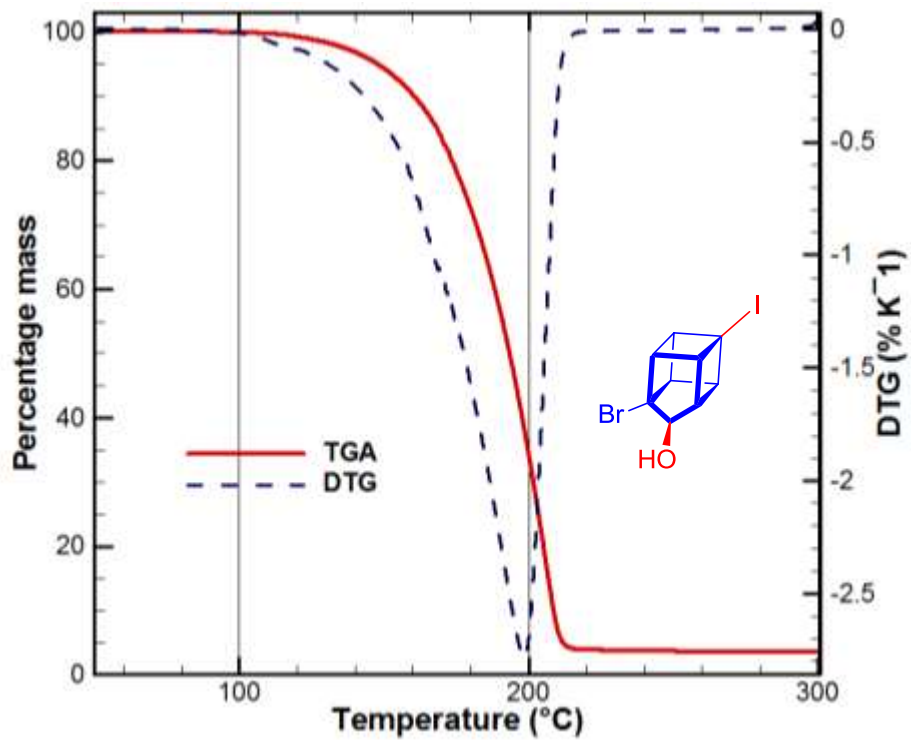

Fig-T5. TGA-DTG of Compound 12 at 15K min<sup>-1</sup>

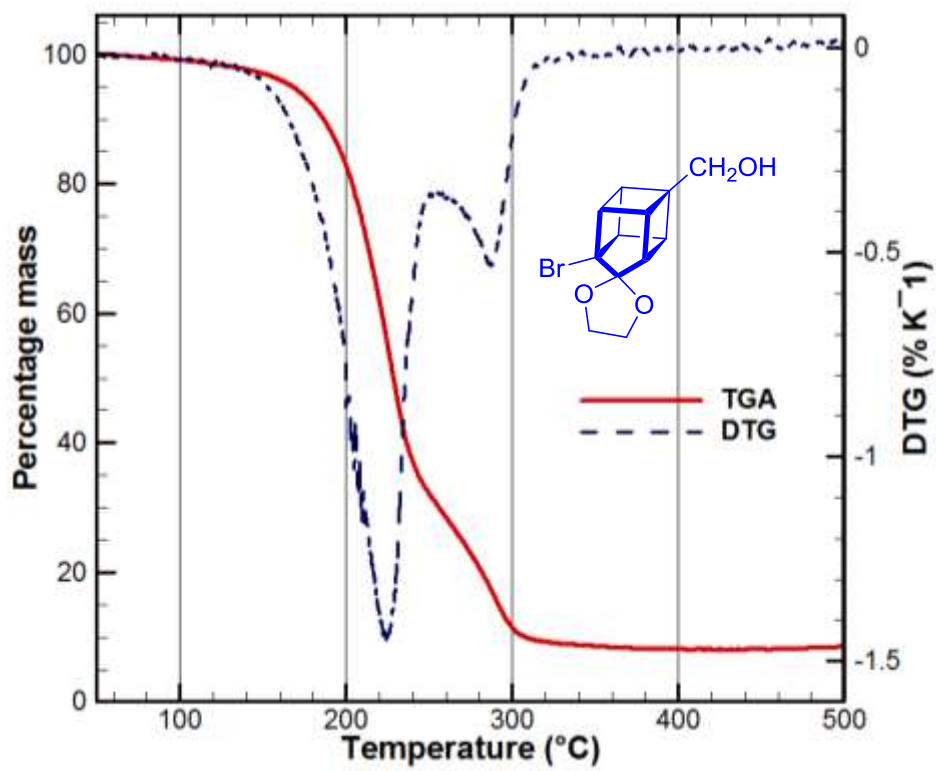

Fig-T6. TGA-DTG of Compound 13 at 15K min<sup>-1</sup>

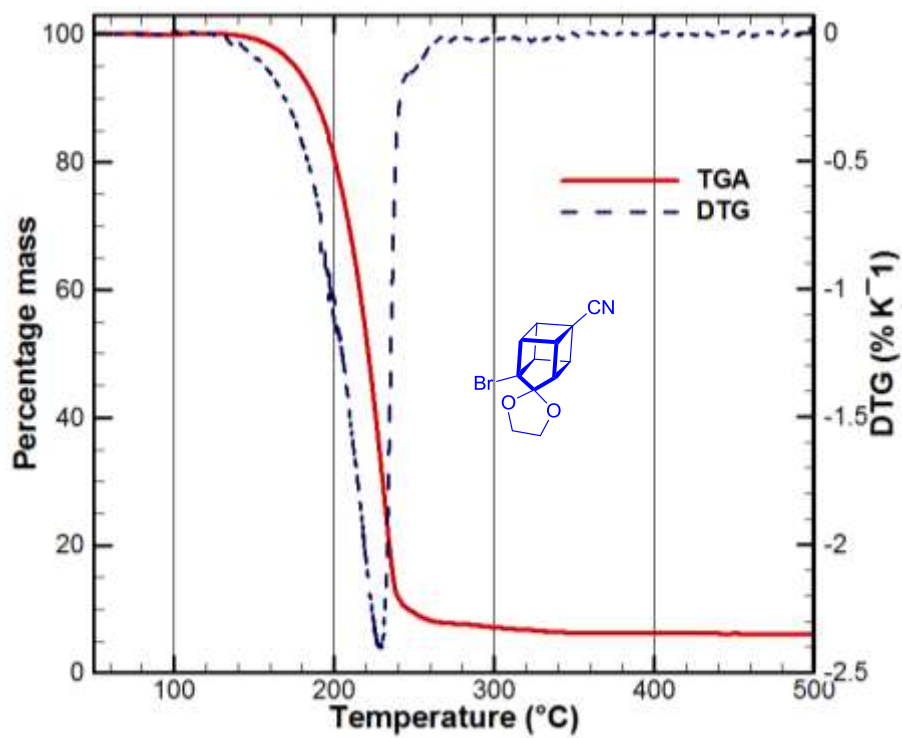

**Fig-T7.** TGA-DTG of Compound **14** at  $15\text{K min}^{-1}$

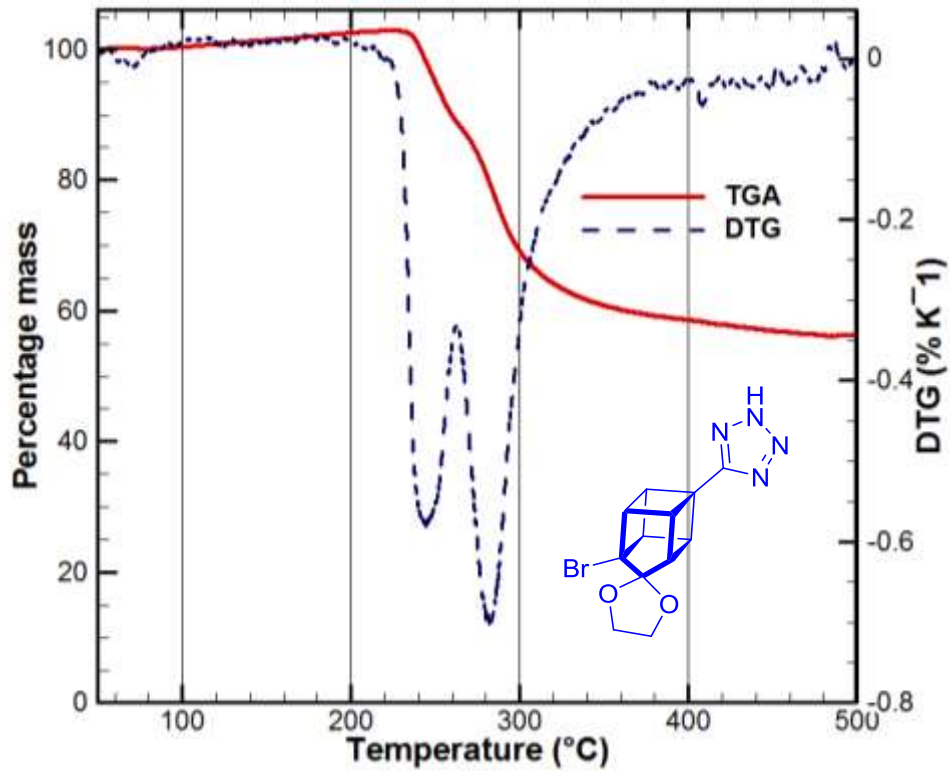

**Fig-T8.** TGA-DTG of Compound **15** at  $15\text{K min}^{-1}$

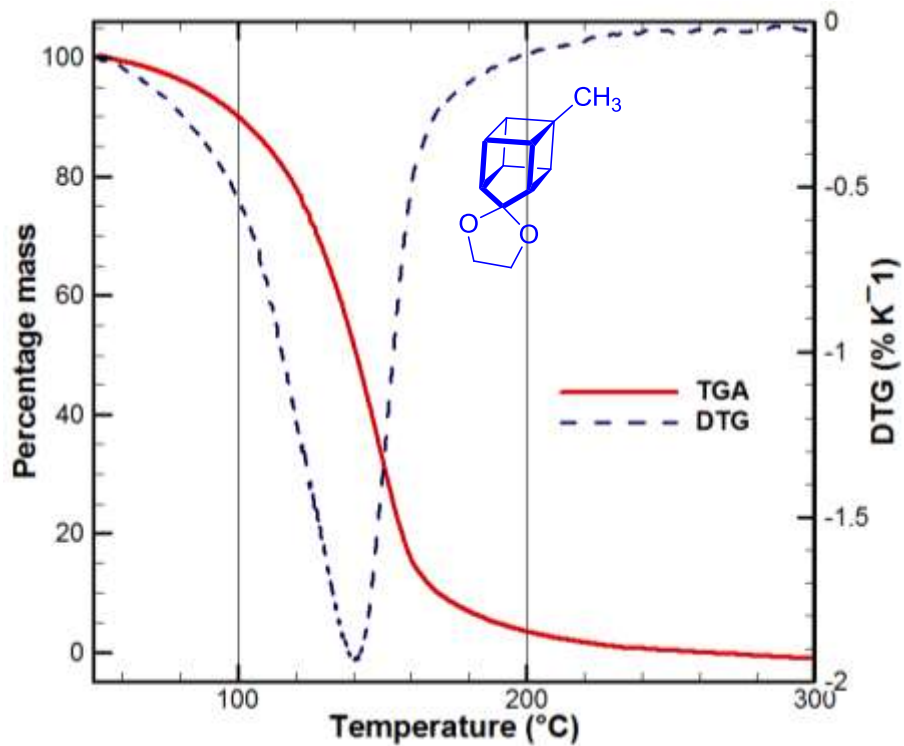

**Fig-T9.** TGA-DTG of Compound **18** at  $15\text{K min}^{-1}$

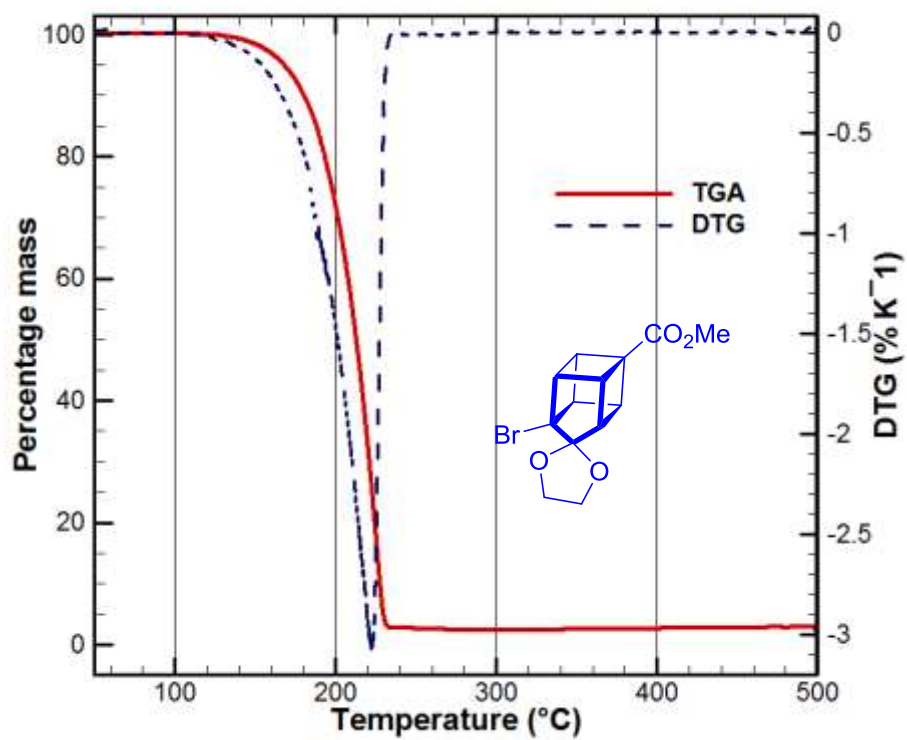

**Fig-T10.** TGA-DTG of Compound **19** at  $15\text{K min}^{-1}$

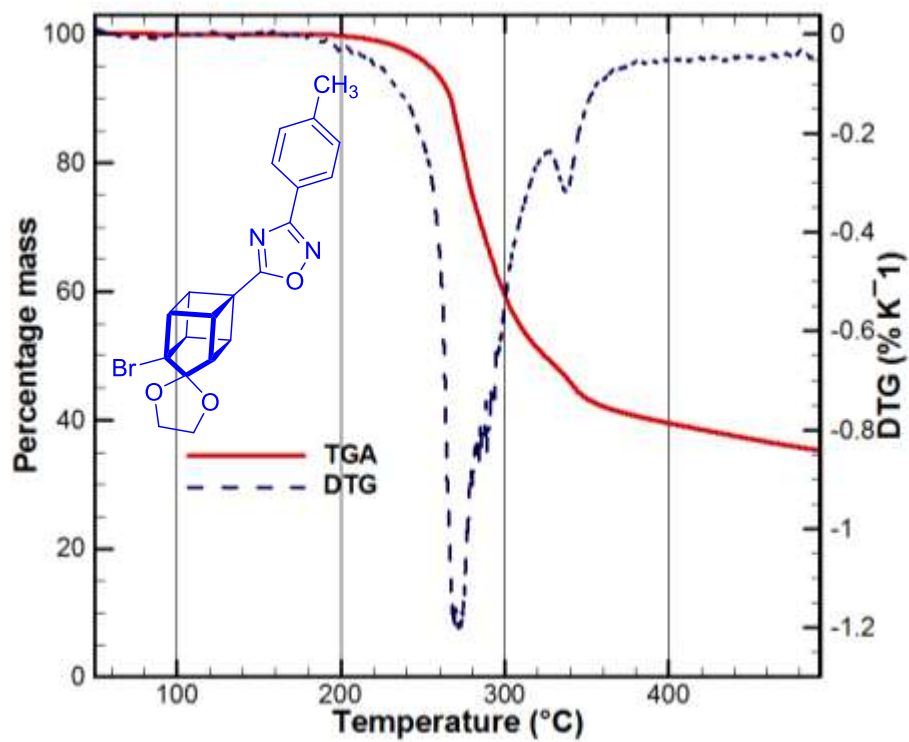

**Fig-T11.** TGA-DTG of compound **21a** at 15K min<sup>-1</sup>

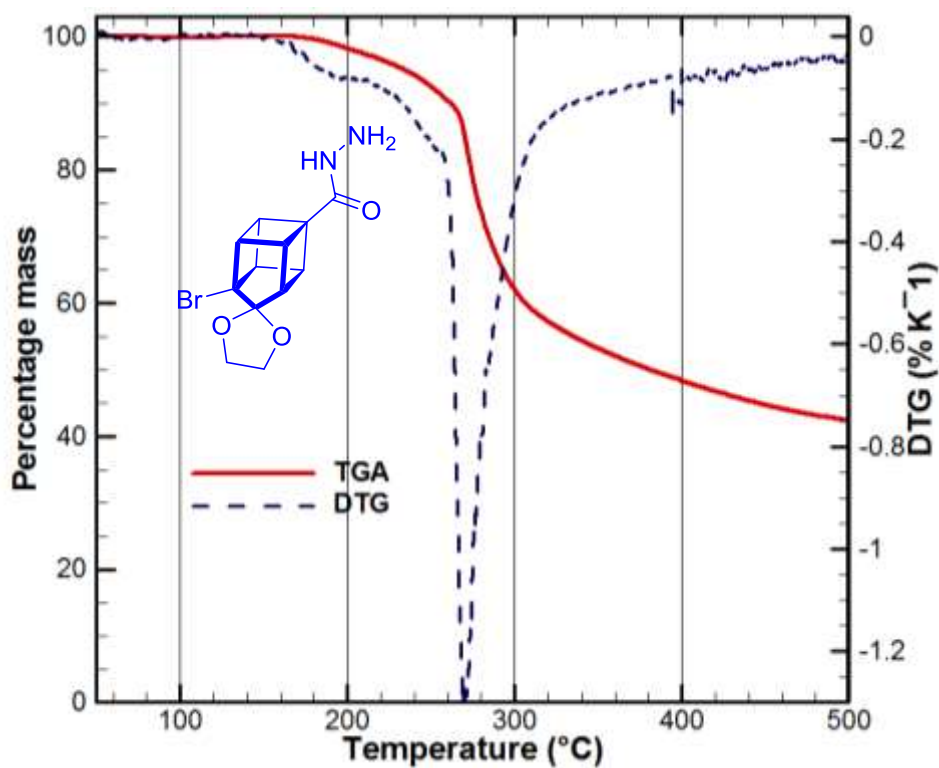

**Fig-T12.** TGA-DTG of Compound **25** at 15K min<sup>-1</sup>

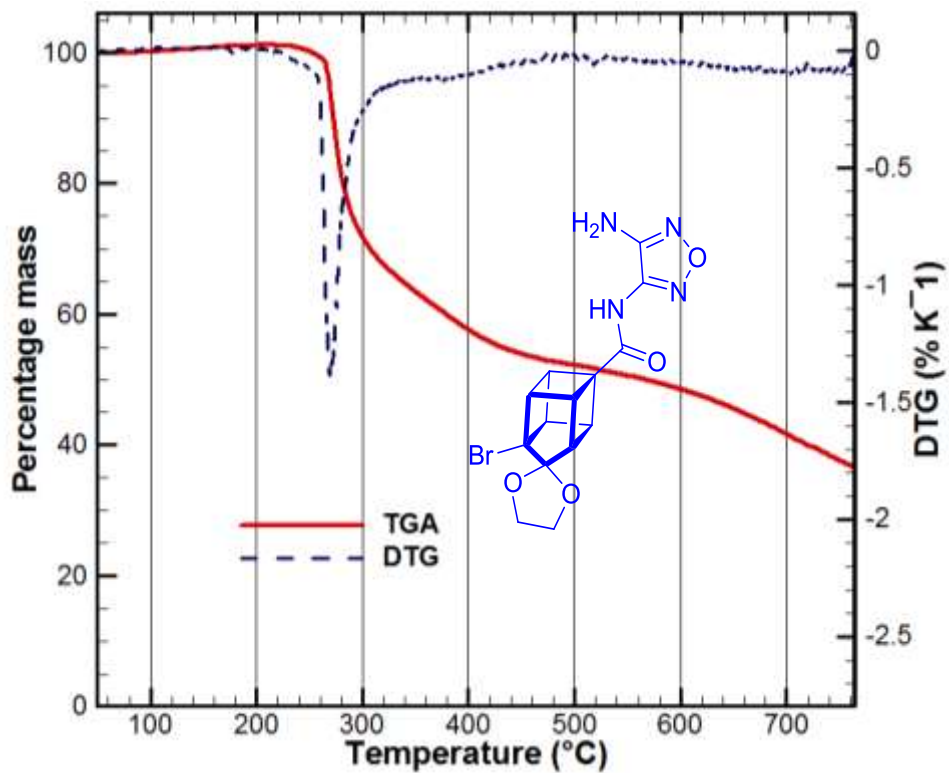

Fig-T13. TGA-DTG of compound **27** at 15K min<sup>-1</sup>

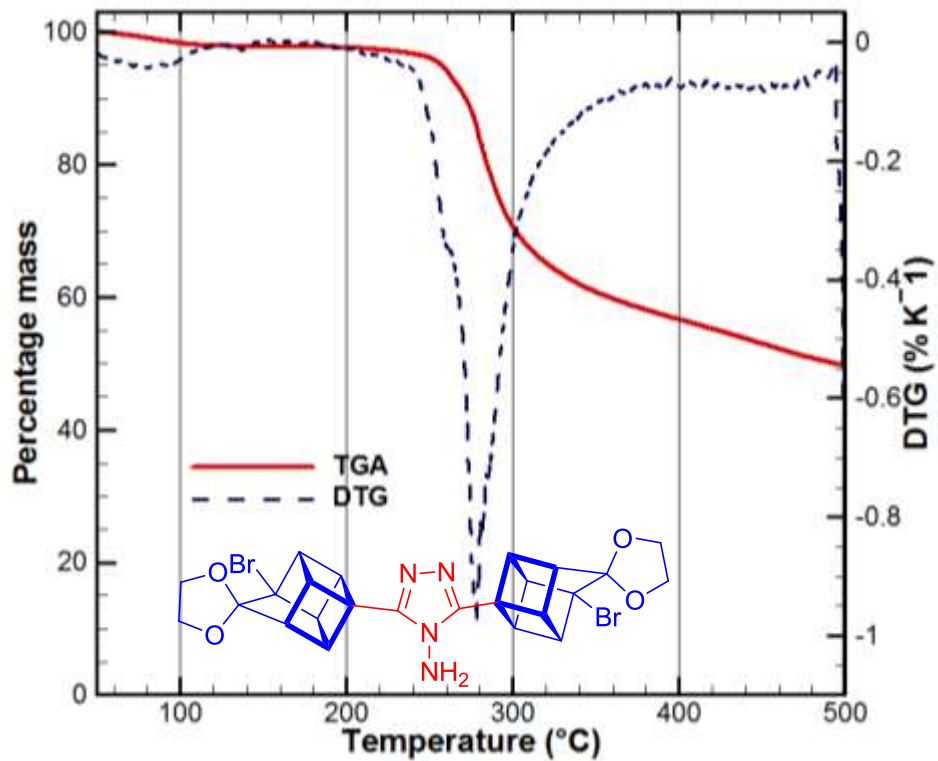

Fig-T14. TGA-DTG of Compound **28** at 15K min<sup>-1</sup>



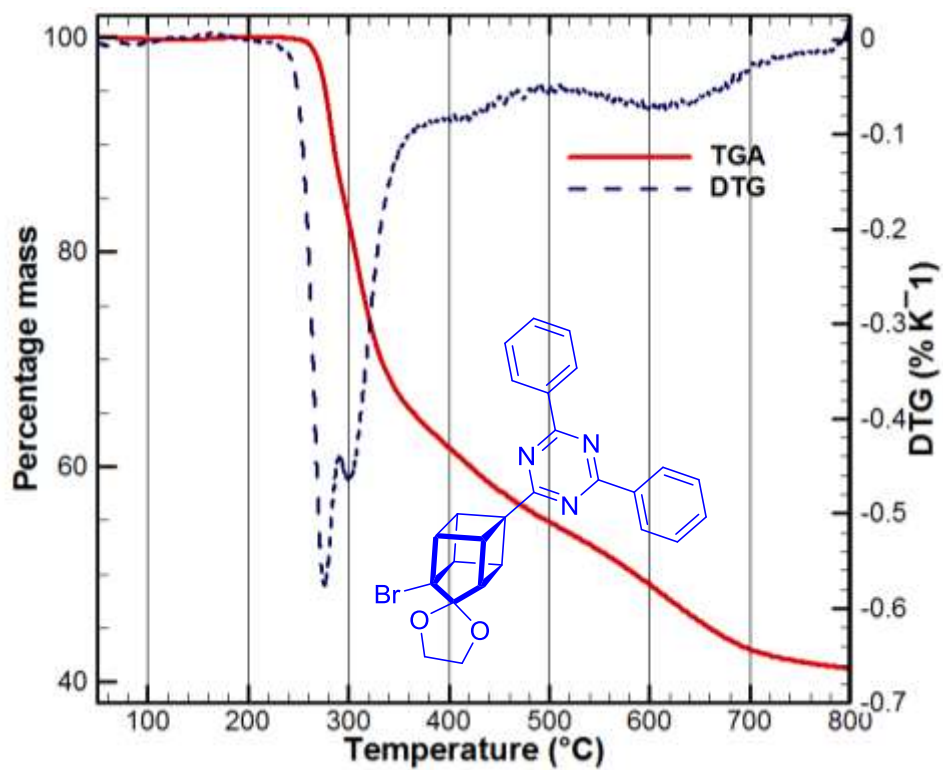

Fig-T15. TGA-DTG of Compound **30a** at  $15\text{K min}^{-1}$

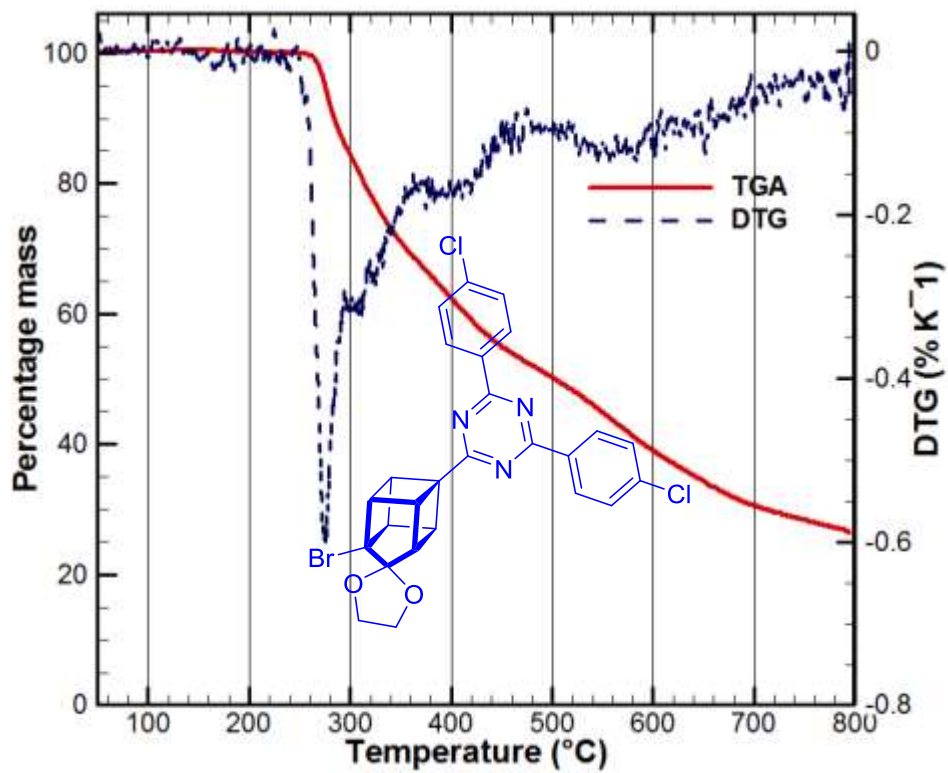

Fig-T16. TGA-DTG of Compound **30b** at  $15\text{K min}^{-1}$

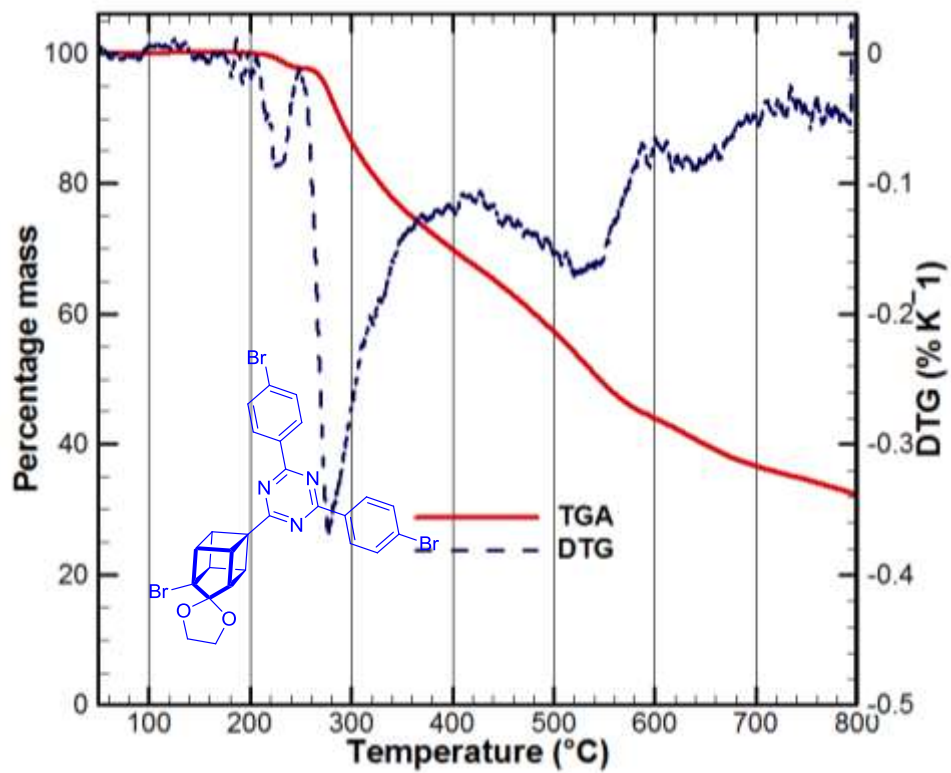

**Fig-T17.** TGA-DTG of Compound **30c** at 15K min<sup>-1</sup>
